# Supplementary material for: Direct methylthiolation ofC-,S-, andP-nucleophiles with sodiumS-methyl thiosulfate
Source: Royal Society of Chemistry journal article supplement (doi:10.1039/d2ob02056d), 2022-12-26

## Supporting Information

### Direct methylthiolation of *C*-, *S*-, and *P*- nucleophiles with Sodium *S*-Methyl Thiosulfate

Fanmin Liu<sup>\*a</sup>

<sup>a</sup> Division of Specialty Chemicals, Institute of Zhejiang University-Quzhou, Quzhou, 324000, P. R. China. Fax: +86-0570-8017322; Tel: +86-0570-8017322.

\* Corresponding Author E-mail: liufm@zju.edu.cn

|                                    |            |
|------------------------------------|------------|
| <b>1. General Information.....</b> | <b>S2</b>  |
| <b>2. Screening Reaction.....</b>  | <b>S3</b>  |
| <b>3. General procedure.....</b>   | <b>S7</b>  |
| <b>4. NMR Spectra.....</b>         | <b>S21</b> |

## 1 General Information

All chemical reagents are obtained from commercial suppliers and used without further purification. All known compounds are identified by appropriate technique such as  $^1\text{H}$  NMR,  $^{13}\text{C}$  NMR and compared with previously reported data. All unknown compounds are characterized by  $^1\text{H}$  NMR,  $^{13}\text{C}$  NMR and HRMS. Analytical thin-layer chromatography are performed on glass plates precoated with silica gel impregnated with a fluorescent indicator (254 nm), and the plates are visualized by exposure to ultraviolet light. Mass spectra are taken on a Finnigan TSQ Quantum-MS instrument in the electrospray ionization (ESI) mode.  $^1\text{H}$ ,  $^{19}\text{F}$  and  $^{13}\text{C}$  NMR spectra were recorded on a 500 MHz Bruker DRX 500 and tetramethylsilane (TMS) was used as a reference. Chemical shifts were reported in parts per million (ppm), and the residual solvent peak was used as an internal reference: proton (chloroform  $\delta$  7.26), carbon (chloroform  $\delta$  77.26) and chemical shifts are reported in ppm. Some impurity peak in proton spectrum was water  $\delta$  1.59 and hexane  $\delta$  1.26. GC analyses are performed on an Agilent 7890A instrument (Column: Agilent 19091J-413: 30 m  $\times$  320  $\mu\text{m}$   $\times$  0.25  $\mu\text{m}$ , carrier gas:  $\text{H}_2$ , FID detection. GC-MS data was recorded on a 5975C Mass Selective Detector, coupled with a 7890A Gas Chromatograph (Agilent Technologies). High resolution mass spectral data were acquired on Waters Micromass GCT Premier Spectrometer (electrospray ionization: EI) and Waters Q-Tof microTM (electrospray ionization: ESI).

## 2 Screening Reaction

**Table S1.** Optimization of conditions for reaction of 1,3-diketone with sodium *S*-methyl sulfothioate <sup>a</sup>

$\text{CH}_3\text{SSO}_3\text{Na}$  (**1**) +  $\text{Ph-CO-CH(F)-CO-Ph}$  (**4**)  $\xrightarrow[\text{solvent, temp, time}]{\text{catalyst, base}}$   $\text{Ph-CO-CH(F)(SCH}_3\text{)-CO-Ph}$  (**5**)

| Entry | Catalyse                         | Base                            | Solvent    | Temp (°C) | Time (h) | Yield <sup>b</sup> (%)    |
|-------|----------------------------------|---------------------------------|------------|-----------|----------|---------------------------|
| 1     | CuSO <sub>4</sub><br>(0.2 equiv) |                                 | DMF        | 80        | 10       | 23                        |
| 2     | CuSO <sub>4</sub>                |                                 | DMF        | 80        | 10       | 53                        |
| 4     | CuI                              |                                 | DMF        | 80        | 10       | 33                        |
| 5     | Cu(OAc) <sub>2</sub>             |                                 | DMF        | 80        | 10       | 14                        |
| 6     | CuSO <sub>4</sub>                | Cs <sub>2</sub> CO <sub>3</sub> | DMF        | 80        | 10       | 42                        |
| 7     | CuSO <sub>4</sub>                | KF                              | DMF        | 80        | 10       | 35                        |
| 8     | CuSO <sub>4</sub>                | NaH                             | DMF        | 80        | 10       | 47                        |
| 9     | CuSO <sub>4</sub>                |                                 | DMSO       | 80        | 10       | 51                        |
| 10    | CuSO <sub>4</sub>                |                                 | THF        | 80        | 10       | 32                        |
| 11    | CuSO <sub>4</sub>                |                                 | DMF        | 50        | 10       | 59                        |
| 12    | CuSO <sub>4</sub>                |                                 | DMF        | 30        | 10       | 48                        |
| 13    | CuSO <sub>4</sub>                |                                 | DMF        | 110       | 10       | 52                        |
| 14    | CuSO <sub>4</sub>                |                                 | DMF        | 50        | 12       | 65                        |
| 15    | <b>CuSO<sub>4</sub></b>          |                                 | <b>DMF</b> | <b>50</b> | 24       | <b>74(70<sup>c</sup>)</b> |

<sup>a</sup> Unless otherwise specified, the reaction was carried out in the presence of  $\beta$ -ketoester (0.4 mmol, 1.0 equiv), sodium *S*-methyl sulfothioate **1** (99 mg, 0.6 mmol, 1.5 equiv), catalyst (0.2 mmol, 0.5 equiv), base (0.4 mmol, 1.0 equiv) and solvent (4 mL), air. <sup>b</sup> GC yield. <sup>c</sup> isolated yield.



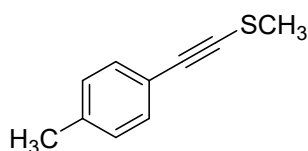

Chemical Formula: C<sub>10</sub>H<sub>10</sub>S  
Exact Mass: 162.0503

Methyl(p-tolyethynyl)sulfane. **3b<sup>1</sup>**, Purification by column chromatography on silica gel (petroleum ether) afforded a yellow oil (86%, 55.7 mg). <sup>1</sup>H NMR (500 MHz, Chloroform-d) δ 7.34 – 7.28 (m, 2H), 7.10 (d, J = 7.8 Hz, 2H), 2.47 (s, 3H), 2.34 (s, 3H); <sup>13</sup>C NMR (126 MHz, Chloroform-d) δ 138.52 , 131.75 , 129.28 , 120.55 , 92.15 , 80.11 , 21.71 , 19.70.

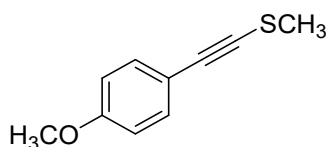

Chemical Formula: C<sub>10</sub>H<sub>10</sub>OS  
Exact Mass: 178.0452

((4-Methoxyphenyl)ethynyl)(methyl)sulfane. **3c<sup>1</sup>**, Purification by column

chromatography on silica gel (petroleum ether/Ethyl acetate=20:1) afforded a light yellow oil (88%, 62.6 mg). <sup>1</sup>H NMR (500 MHz, Chloroform-d) δ 7.41 – 7.33 (m, 2H), 6.85 – 6.79 (m, 2H), 3.81 (s, 3H), 2.46 (s, 3H); <sup>13</sup>C NMR (126 MHz, Chloroform-d) δ 159.85 , 133.63 , 115.74 , 114.16 , 91.86 , 79.19 , 55.53 , 19.76 .

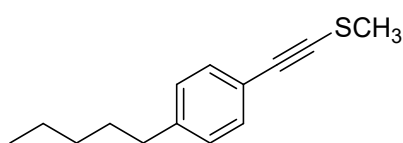

Chemical Formula: C<sub>14</sub>H<sub>18</sub>S  
Exact Mass: 218.1129

Methyl((4-pentylphenyl)ethynyl)sulfane. **3d**, Purification by column chromatography on silica gel (petroleum ether) afforded a colorless oil (83%, 72.4 mg). <sup>1</sup>H NMR (500 MHz, Chloroform-d) δ 7.33 (d, J = 7.9 Hz, 2H), 7.10 (d, J = 7.8 Hz, 2H), 2.58 (t, J = 7.8 Hz, 2H), 2.46 (s, 3H), 1.60 (q, J = 7.6 Hz, 2H), 1.30 (dtt, J = 17.9, 8.6, 5.1 Hz, 4H), 0.88 (t, J = 6.8 Hz, 3H); <sup>13</sup>C NMR (126 MHz, Chloroform-d) δ 143.58 , 131.77 , 128.63 , 120.72 , 92.20 , 80.10 , 36.08 , 31.66 , 31.14 , 22.75 , 19.72 , 14.25 . HRMS (EI) Calcd. for C<sub>14</sub>H<sub>18</sub>S 218.1129, found 218.1135.

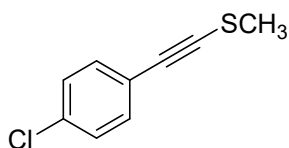

Chemical Formula: C<sub>9</sub>H<sub>7</sub>ClS  
Exact Mass: 181.9957

((4-Chlorophenyl)ethynyl)(methyl)sulfane. **3e<sup>1</sup>**, Purification by column chromatography on silica gel (petroleum ether) afforded a light yellow oil (75%, 54.6 mg). <sup>1</sup>H NMR (500 MHz, Chloroform-d) δ 7.35 – 7.31 (m, 2H), 7.28 – 7.26 (m, 2H), 2.48 (s, 3H); <sup>13</sup>C NMR (126 MHz, Chloroform-d) δ 134.27 , 132.87 , 128.86 , 122.15 , 91.00 , 82.45 , 19.58 .

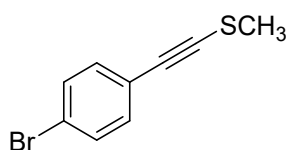

Chemical Formula: C<sub>9</sub>H<sub>7</sub>BrS  
Exact Mass: 225.9452

((4-Bromophenyl)ethynyl)(methyl)sulfane. **3f<sup>1</sup>**, Purification by column

chromatography on silica gel (petroleum ether) afforded a yellow oil (74%, 66.9 mg).  $^1\text{H}$  NMR (500 MHz, Chloroform-*d*)  $\delta$  7.42 (d,  $J$  = 8.5 Hz, 2H), 7.27 (s, 1H), 7.25 (s, 1H), 2.48 (s, 3H);  $^{13}\text{C}$  NMR (126 MHz, Chloroform-*d*)  $\delta$  133.04 , 131.78 , 122.62 , 122.43 , 91.09 , 82.70 , 19.56 .

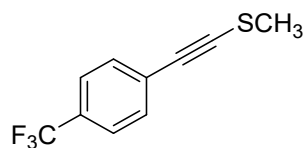

Chemical Formula:  $\text{C}_{10}\text{H}_7\text{F}_3\text{S}$   
Exact Mass: 216.0221

Methyl((4-(trifluoromethyl)phenyl)ethynyl)sulfane. **3g<sup>2</sup>**, Purification by column chromatography on silica gel (petroleum ether) afforded a yellow oil (81%, 70.0 mg).  $^1\text{H}$  NMR (500 MHz, Chloroform-*d*)  $\delta$  7.54 (d,  $J$  = 8.1 Hz, 2H), 7.48 (d,  $J$  = 8.1 Hz, 2H), 2.50 (s, 3H);  $^{13}\text{C}$  NMR (126 MHz, Chloroform-*d*)  $\delta$  131.47 , 129.87 , 129.61 , 129.35 , 127.45 , 125.46 , 125.27 , 123.09 , 91.08 , 84.70 , 19.54 ;  $^{19}\text{F}$  NMR (470 MHz, Chloroform-*d*)  $\delta$  -62.72 .

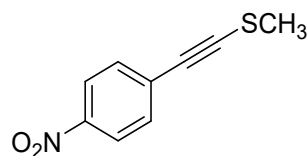

Chemical Formula:  $\text{C}_9\text{H}_7\text{NO}_2\text{S}$   
Exact Mass: 193.0197

Methyl((4-nitrophenyl)ethynyl)sulfane. **3h<sup>3</sup>**, Purification by column chromatography on silica gel (petroleum ether/Ethyl acetate=10:1, v/v) afforded a red solid (63%, 48.6 mg). Mp: 71-75 °C.  $^1\text{H}$  NMR (500 MHz, Chloroform-*d*)  $\delta$  8.25 (d,  $J$  = 8.9 Hz, 2H), 8.05 (d,  $J$  = 8.8 Hz, 2H), 2.61 (s, 3H);  $^{13}\text{C}$  NMR (126 MHz, Chloroform-*d*)  $\delta$  150.60 , 141.60 , 129.54 , 124.10 , 93.10 , 79.96 , 27.23 .

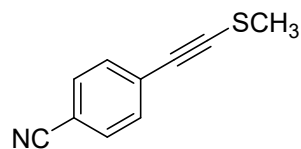

Chemical Formula:  $\text{C}_{10}\text{H}_7\text{NS}$   
Exact Mass: 173.0299

4-((Methylthio)ethynyl)benzonitrile. **3i**, Purification by column chromatography on silica gel (petroleum ether/Ethyl acetate=10:1, v/v) afforded a yellow solid (70%, 48.5 mg). Mp: 74-79 °C.  $^1\text{H}$  NMR (500 MHz, Chloroform-*d*)  $\delta$  8.05 (d,  $J$  = 8.7 Hz, 2H), 7.82 – 7.73 (m, 2H), 2.65 (s, 3H);  $^{13}\text{C}$  NMR (126 MHz, Chloroform-*d*)  $\delta$  140.17 , 132.77 , 128.95 , 118.17 , 116.69 , 95.38 , 81.82 , 27.01 . HRMS (EI) Calcd. for  $\text{C}_{10}\text{H}_7\text{NS}$  173.0299, found 173.0303.

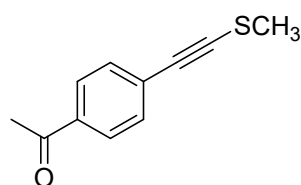

Chemical Formula:  $\text{C}_{11}\text{H}_{10}\text{OS}$   
Exact Mass: 190.0452

1-(4-((methylthio)ethynyl)phenyl)ethan-1-one. **3j**, Purification by column chromatography on silica gel (petroleum ether/Ethyl acetate=3:1, v/v) afforded a yellow solid (68%, 51.7 mg). Mp: 71-74 °C.  $^1\text{H}$  NMR (500 MHz, Chloroform-*d*)  $\delta$  7.91 – 7.85 (m, 2H), 7.48 – 7.42 (m, 2H), 2.59 (s, 3H), 2.51 (s, 3H);  $^{13}\text{C}$  NMR (126 MHz, Chloroform-*d*)  $\delta$  197.23 , 135.81 , 131.00 , 128.32 , 128.26 , 91.58 , 85.55 , 26.57 , 19.38 . HRMS (EI) Calcd. for  $\text{C}_{11}\text{H}_{10}\text{OS}$  190.0452, found 190.0457.

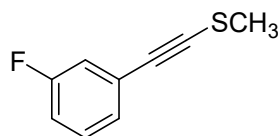

Chemical Formula: C<sub>9</sub>H<sub>7</sub>FS  
Exact Mass: 166.0252

((3-Fluorophenyl)ethynyl)(methyl)sulfane. **3k**, Purification by column chromatography on silica gel (petroleum ether) afforded a light yellow oil (72%, 47.8 mg). <sup>1</sup>H NMR (500 MHz, Chloroform-d) δ 7.24 (dd, J = 8.0, 5.8 Hz, 1H), 7.20 – 7.15 (m, 1H), 7.09 (ddd, J = 9.5, 2.6, 1.4 Hz, 1H), 7.03 – 6.96 (m, 1H), 2.48 (s, 3H); <sup>13</sup>C NMR (126 MHz, Chloroform-d) δ 162.58 (d, J = 246.5 Hz), 130.07, 127.39, 125.49, 118.28 (d, J = 22.7 Hz), 115.56 (d, J = 21.0 Hz), 90.97, 82.68, 19.55; <sup>19</sup>F NMR (470 MHz, Chloroform-d) δ -112.99. HRMS (EI) Calcd. for C<sub>9</sub>H<sub>7</sub>FS 166.0252, found 166.0247.

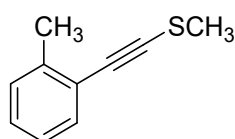

Chemical Formula: C<sub>10</sub>H<sub>10</sub>S  
Exact Mass: 162.0503

Methyl(*o*-tolylethynyl)sulfane. **3l**, Purification by column chromatography on silica gel (petroleum ether) afforded a yellow oil (74%, 47.9 mg). <sup>1</sup>H NMR (500 MHz, Chloroform-d) δ 7.25 – 7.15 (m, 3H), 7.10 (d, J = 7.6 Hz, 1H), 2.47 (s, 3H), 2.31 (s, 3H); <sup>13</sup>C NMR (126 MHz, Chloroform-d) δ 138.19, 132.27, 129.21, 128.76, 128.40, 123.42, 92.27, 80.67, 21.44, 19.68. HRMS (EI) Calcd. for C<sub>10</sub>H<sub>10</sub>S 162.0503, found 162.0510.

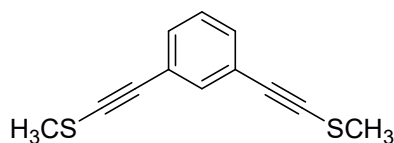

Chemical Formula: C<sub>12</sub>H<sub>10</sub>S<sub>2</sub>  
Exact Mass: 218.0224

1,3-Bis((methylthio)ethynyl)benzene. **3m<sup>4</sup>**, Purification by column chromatography on silica gel (petroleum ether/Ethyl acetate=10:1, v/v) afforded a yellow oil (65%, 56.7 mg). <sup>1</sup>H NMR (500 MHz, Chloroform-d) δ 7.45 – 7.43 (m, 1H), 7.32 – 7.29 (m, 2H), 7.22 (m, 1H), 2.47 (s, 6H); <sup>13</sup>C NMR (126 MHz, Chloroform-d) δ 134.17, 130.86, 128.45, 123.79, 91.20, 81.96, 19.49.

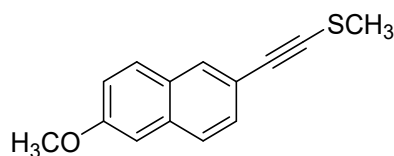

Chemical Formula: C<sub>14</sub>H<sub>12</sub>OS  
Exact Mass: 228.0609

((6-Methoxynaphthalen-2-yl)ethynyl)(methyl)sulfane. **3n<sup>1</sup>**, Purification by column chromatography on silica gel (petroleum ether/Ethyl acetate=10:1, v/v) afforded a yellow solid (70%, 63.8 mg). Mp: 94-97 °C. <sup>1</sup>H NMR (500 MHz, Chloroform-d) δ 7.86 (s, 1H), 7.65 (dd, J = 12.5, 8.7 Hz, 2H), 7.43 (dd, J = 8.5, 1.7 Hz, 1H), 7.14 (dd, J = 9.0, 2.5 Hz, 1H), 7.09 (d, J = 2.6 Hz, 1H), 3.91 (s, 3H), 2.50 (s, 3H); <sup>13</sup>C NMR (126 MHz, Chloroform-d) δ 158.52, 134.26, 131.51, 129.51, 129.25, 128.66, 126.98, 119.62, 118.51, 106.02, 92.58, 80.52, 55.59, 19.77.

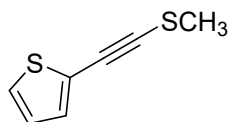

Chemical Formula: C<sub>7</sub>H<sub>6</sub>S<sub>2</sub>  
Exact Mass: 153.9911

2-((Methylthio)ethynyl)thiophene. **3o<sup>5</sup>**, Purification by column chromatography on silica gel (petroleum ether) afforded a colorless oil (62%, 38.2mg). <sup>1</sup>H NMR (500 MHz, Chloroform-d) δ 7.26 – 7.24 (m, 1H), 7.21 (dd, J = 3.6, 1.2 Hz, 1H), 6.96 (dd, J = 5.2, 3.7 Hz, 1H), 2.46 (s, 3H); <sup>13</sup>C NMR (126 MHz, Chloroform-d) δ 133.18 , 127.99 , 127.16 , 123.82 , 85.60 , 84.84 , 19.76 .

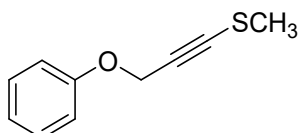

Chemical Formula: C<sub>10</sub>H<sub>10</sub>OS  
Exact Mass: 178.0452

Methyl(3-phenoxyprop-1-yn-1-yl)sulfane. **3p**, Purification by column chromatography on silica gel (petroleum ether) afforded a yellow oil (87%, 61.9 mg). <sup>1</sup>H NMR (500 MHz, Chloroform-d) δ 7.33 – 7.27 (m, 2H), 7.01 – 6.92 (m, 3H), 4.78 (s, 2H), 2.38 (s, 3H); <sup>13</sup>C NMR (126 MHz, Chloroform-d) δ 157.90 , 129.68 , 121.63 , 115.16 , 88.30 , 80.30 , 57.05 , 19.21 . HRMS (EI) Calcd. for C<sub>10</sub>H<sub>10</sub>OS 178.0452, found 178.0446.

### 3.3 General procedures for methylthiolation of 1,3-diketones

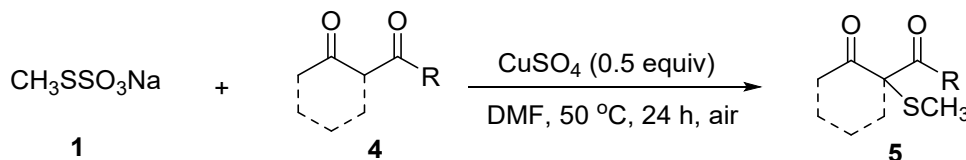

A flask was charged with 1,3-diketones (0.4 mmol, 1.0 equiv), sodium *S*-methyl sulfonate **1** (99 mg, 0.6 mmol, 1.5 equiv), CuSO<sub>4</sub> (32 mg, 0.2 mmol, 0.5 equiv) and DMF (4 mL). The reaction mixture was stirred at 50 °C in air for 24 h. After completion of the reaction as monitored by TLC, the mixture was cooled to room temperature, poured into EtOAc (20 mL) and H<sub>2</sub>O (20 mL), and extracted several times with EtOAc (3 \* 15 mL). The combined organic layers were washed with water and brine, dried over Na<sub>2</sub>SO<sub>4</sub>, and filtered. The solvent was removed in vacuum and the residue was purified by column chromatography (silica gel, Petroleum ether/ Ethyl acetate) to afford the methylthiolated product **5**.

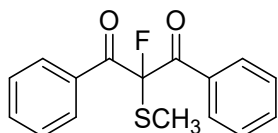

Chemical Formula: C<sub>16</sub>H<sub>13</sub>FO<sub>2</sub>S  
Exact Mass: 288.0620

2-Fluoro-2-(methylthio)-1,3-diphenylpropane-1,3-dione. **5a**, Purification by column chromatography on silica gel (petroleum ether/Ethyl acetate=5:1, v/v) afforded a colorless oil (60%, 69.1 mg). <sup>1</sup>H NMR (500 MHz, Chloroform-d) δ 8.05 (d, J = 7.7 Hz, 4H), 7.56 – 7.50 (m, 2H), 7.39 (t, J = 7.9 Hz, 4H), 2.15 (d, J = 1.9 Hz, 3H); <sup>13</sup>C



NMR (126 MHz, Chloroform-*d*)  $\delta$  189.46, 134.58, 133.41, 130.31, 130.13, 128.92, 29.96;  $^{19}\text{F}$  NMR (470 MHz, Chloroform-*d*)  $\delta$  -130.65 . HRMS (EI) Calcd. for  $\text{C}_{16}\text{H}_{13}\text{FO}_2\text{S}$  288.0620, found 288.0627.

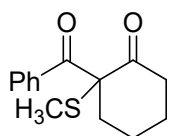

Chemical Formula:  $\text{C}_{14}\text{H}_{16}\text{O}_2\text{S}$   
Exact Mass: 248.0871

2-Benzoyl-2-(methylthio)cyclohexan-1-one. **5b**, Purification by column chromatography on silica gel (petroleum ether/Ethyl acetate=5:1, v/v) afforded a light yellow oil (32%, 31.6 mg).  $^1\text{H}$  NMR (500 MHz, Chloroform-*d*)  $\delta$  8.05 – 7.98 (m, 2H), 7.55 – 7.48 (m, 1H), 7.39 (t,  $J = 7.8$  Hz, 2H), 3.05 (dd,  $J = 13.3, 2.9$  Hz, 1H), 2.60 – 2.51 (m, 1H), 2.12 (td,  $J = 12.8, 5.8$  Hz, 1H), 2.05 – 2.00 (m, 1H), 1.91 (s, 3H), 1.86 – 1.72 (m, 4H);  $^{13}\text{C}$  NMR (126 MHz, Chloroform-*d*)  $\delta$  207.34 , 191.21 , 133.29 , 129.71 , 128.98 , 128.75 , 128.31 , 42.76 , 37.85 , 28.58 , 23.07 , 11.40 . HRMS (EI) Calcd. for  $\text{C}_{14}\text{H}_{16}\text{O}_2\text{S}$  248.0871, found 248.0869.

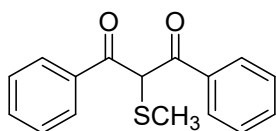

Chemical Formula:  $\text{C}_{16}\text{H}_{14}\text{O}_2\text{S}$   
Exact Mass: 270.07

2-(methylthio)-1,3-diphenylpropane-1,3-dione. **5c**, Purification by column chromatography on silica gel (petroleum ether/Ethyl acetate=10:1, v/v) afforded a yellow oil (10%, 10.8 mg).  $^1\text{H}$  NMR (500 MHz, Chloroform-*d*)  $\delta$  7.99 (d,  $J = 7.7$  Hz, 4H), 7.56 (d,  $J = 7.5$  Hz, 2H), 7.45 (t,  $J = 7.8$  Hz, 4H), 5.75 (s, 1H), 2.21 (s, 3H).  $^{13}\text{C}$  NMR (126 MHz, Chloroform-*d*)  $\delta$  191.67, 135.41, 133.99, 129.33, 129.10, 58.10, 29.96.

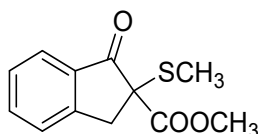

Chemical Formula:  $\text{C}_{12}\text{H}_{12}\text{O}_3\text{S}$   
Exact Mass: 236.0507

Methyl 2-(methylthio)-1-oxo-2,3-dihydro-1H-indene-2-carboxylate. **5d**, Purification by column chromatography on silica gel (petroleum ether/Ethyl acetate=3:1, v/v) afforded a yellow oil (75%, 70.8 mg).  $^1\text{H}$  NMR (500 MHz, Chloroform-*d*)  $\delta$  7.87 – 7.80 (m, 1H), 7.64 (m, 1.2 Hz, 1H), 7.50 – 7.40 (m, 2H), 3.90 (d,  $J = 17.8$  Hz, 1H), 3.81 (s, 3H), 3.16 (d,  $J = 17.7$  Hz, 1H), 2.32 (s, 3H);  $^{13}\text{C}$  NMR (126 MHz, Chloroform-*d*)  $\delta$  196.42 , 170.00 , 150.59 , 135.61 , 134.10 , 128.47 , 126.37 , 125.78 , 58.21 , 53.52 , 40.22 , 13.84 . HRMS (EI) Calcd. for  $\text{C}_{12}\text{H}_{12}\text{O}_3\text{S}$  236.0507, found 236.0504.

### 3.4 General procedures for methylthiolation of thiols

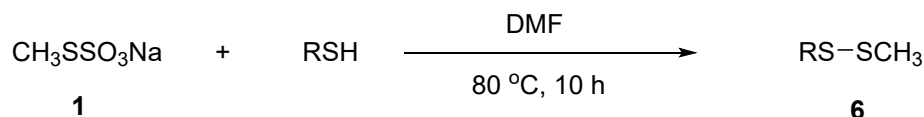

A flask was charged with thiol (0.4 mmol, 1.0 equiv), sodium *S*-methyl sulfthioate (99 mg, 0.6 mmol, 1.5 equiv) and DMF (4 mL). The reaction mixture was stirred at 80 °C for 10 h. After completion of the reaction as monitored by TLC, the mixture was cooled to room temperature, poured into EtOAc (20 mL) and H<sub>2</sub>O (20 mL), and extracted several times with EtOAc (3 \*15 mL). The combined organic layers were washed with water and brine, dried over Na<sub>2</sub>SO<sub>4</sub>, and filtered. The solvent was removed in vacuo and the residue was purified by column chromatography (silica gel, Petroleum ether/ Ethyl acetate) to afford the methylthiolated thiol **6**.

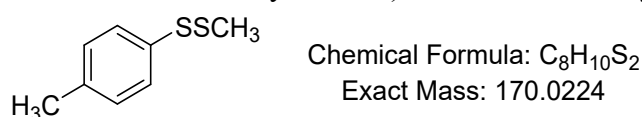

1-Methyl-2-(*p*-tolyl)disulfane. **6a**<sup>11</sup>, Purification by column chromatography on silica gel (petroleum ether) afforded a yellow oil (81%, 55.1 mg). <sup>1</sup>H NMR (500 MHz, Chloroform-*d*) δ 7.43 (d, *J* = 8.0 Hz, 2H), 7.15 (d, *J* = 7.8 Hz, 2H), 2.43 (s, 3H), 2.34 (s, 3H); <sup>13</sup>C NMR (126 MHz, Chloroform-*d*) δ 137.52, 133.74, 130.05, 128.93, 23.15, 21.28.

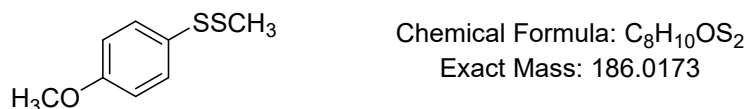

1-(4-Methoxyphenyl)-2-methyldisulfane. **6b**<sup>12</sup>, Purification by column chromatography on silica gel (petroleum ether) afforded a colorless oil (76%, 56.5 mg). <sup>1</sup>H NMR (500 MHz, Chloroform-*d*) δ 7.51 – 7.45 (m, 2H), 6.90 – 6.84 (m, 2H), 3.81 (s, 3H), 2.44 (s, 3H); <sup>13</sup>C NMR (126 MHz, Chloroform-*d*) δ 159.99, 132.34, 128.11, 114.96, 55.65, 23.12.

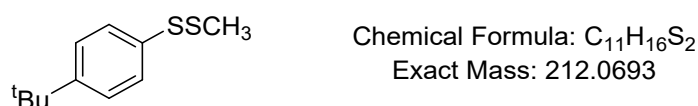

1-(4-(*tert*-Butyl)phenyl)-2-methyldisulfane. **6c**, Purification by column chromatography on silica gel (petroleum ether) afforded a colorless oil (78%, 66.1 mg). <sup>1</sup>H NMR (500 MHz, Chloroform-*d*) δ 7.46 (d, *J* = 8.6 Hz, 2H), 7.36 (d, *J* = 8.5 Hz, 2H), 2.44 (s, 3H), 1.31 (s, 9H); <sup>13</sup>C NMR (126 MHz, Chloroform-*d*) δ 150.68, 133.78, 128.41, 126.36, 34.79, 31.53, 23.26. HRMS (EI) Calcd. for C<sub>11</sub>H<sub>16</sub>S<sub>2</sub> 212.0693, found 212.0694.

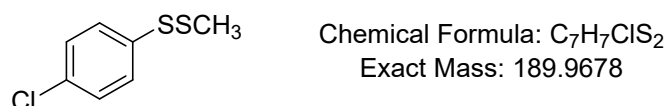

1-(4-Chlorophenyl)-2-methyldisulfane. **6d**<sup>12</sup>, Purification by column chromatography on silica gel (petroleum ether) afforded a light yellow oil (82%, 62.3 mg). <sup>1</sup>H NMR (500 MHz, Chloroform-*d*) δ 7.46 (dd, *J* = 8.6, 0.9 Hz, 2H), 7.30 (dd, *J* = 8.7, 1.0 Hz, 2H), 2.43 (s, 3H); <sup>13</sup>C NMR (126 MHz, Chloroform-*d*) δ 135.78, 133.16, 129.39,

129.25 , 23.09 .

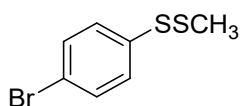

Chemical Formula: C<sub>7</sub>H<sub>7</sub>BrS<sub>2</sub>  
Exact Mass: 233.9173

1-(4-Bromophenyl)-2-methyldisulfane. **6e**<sup>13</sup>, Purification by column chromatography on silica gel (petroleum ether) afforded a yellow oil (79%, 73.9 mg). <sup>1</sup>H NMR (500 MHz, Chloroform-d) δ 7.45 (d, J = 8.5 Hz, 2H), 7.40 (d, J = 8.6 Hz, 2H), 2.43 (s, 3H); <sup>13</sup>C NMR (126 MHz, Chloroform-d) δ 136.48 , 132.31 , 129.40 , 121.02 , 23.08 .

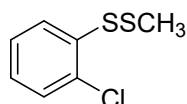

Chemical Formula: C<sub>7</sub>H<sub>7</sub>ClS<sub>2</sub>  
Exact Mass: 189.9678

1-(2-Chlorophenyl)-2-methyldisulfane. **6f**, Purification by column chromatography on silica gel (petroleum ether) afforded a yellow oil (78%, 59.3 mg). <sup>1</sup>H NMR (500 MHz, Chloroform-d) δ 7.78 (dd, J = 8.0, 1.4 Hz, 1H), 7.38 – 7.28 (m, 2H), 7.16 (t, J = 7.6 Hz, 1H), 2.44 (s, 3H); <sup>13</sup>C NMR (126 MHz, Chloroform-d) δ 135.72 , 132.27 , 130.03 , 127.60 , 127.55 , 127.28 , 22.80 . HRMS (EI) Calcd. for C<sub>7</sub>H<sub>7</sub>ClS<sub>2</sub> 189.9678, found 189.9680.

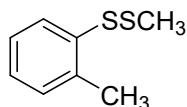

Chemical Formula: C<sub>8</sub>H<sub>10</sub>S<sub>2</sub>  
Exact Mass: 170.0224

1-Methyl-2-(o-tolyl)disulfane. **6g**<sup>14</sup>, Purification by column chromatography on silica gel (petroleum ether) afforded a yellow oil (83%, 56.4 mg). <sup>1</sup>H NMR (500 MHz, Chloroform-d) δ 7.72 – 7.67 (m, 1H), 7.24 – 7.19 (m, 1H), 7.19 – 7.13 (m, 2H), 2.41 (s, 3H), 2.40 (s, 3H); <sup>13</sup>C NMR (126 MHz, Chloroform-d) δ 137.49 , 135.53 , 130.72 , 128.20 , 127.27 , 126.78 , 22.87 , 20.17 .

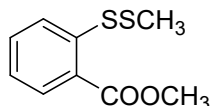

Chemical Formula: C<sub>9</sub>H<sub>10</sub>O<sub>2</sub>S<sub>2</sub>  
Exact Mass: 214.0122

Methyl 2-(methyldisulfanyl)benzoate. **6h**<sup>15</sup>, Purification by column chromatography on silica gel (petroleum ether/Ethyl acetate=10:1, v/v) afforded a yellow oil (87%, 74.5 mg). <sup>1</sup>H NMR (500 MHz, Chloroform-d) δ 8.19 – 8.11 (m, 1H), 8.03 (dd, J = 7.7, 1.5 Hz, 1H), 7.62 – 7.53 (m, 1H), 7.24 (t, J = 7.6 Hz, 1H), 3.93 (s, 3H), 2.39 (s, 3H); <sup>13</sup>C NMR (126 MHz, Chloroform-d) δ 166.99 , 141.49 , 133.09 , 131.75 , 127.19 , 125.35 , 125.29 , 52.45 , 22.22 .

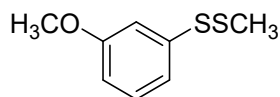

Chemical Formula: C<sub>8</sub>H<sub>10</sub>OS<sub>2</sub>  
Exact Mass: 186.0173

1-(3-Methoxyphenyl)-2-methyldisulfane. **6i**, Purification by column chromatography on silica gel (petroleum ether) afforded a light yellow oil (84%, 62.5 mg). <sup>1</sup>H NMR (500 MHz, Chloroform-d) δ 7.23 (d, J = 7.9 Hz, 1H), 7.13 – 7.06 (m, 2H), 6.77 (ddd, J = 8.2, 2.4, 1.0 Hz, 1H), 3.82 (s, 3H), 2.44 (s, 3H); <sup>13</sup>C NMR (126 MHz, Chloroform-d) 160.38 , 138.47 , 130.10 , 119.81 , 112.89 , 112.75 , 55.57 , 23.19 . HRMS (EI) Calcd. for C<sub>8</sub>H<sub>10</sub>OS<sub>2</sub> 186.0173, found 186.0179.

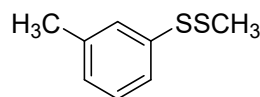

Chemical Formula: C<sub>8</sub>H<sub>10</sub>S<sub>2</sub>  
Exact Mass: 170.0224

1-Methyl-2-(m-tolyl)disulfane. **6j**<sup>14</sup>, Purification by column chromatography on silica gel (petroleum ether) afforded a yellow oil (74%, 62.9 mg). <sup>1</sup>H NMR (500 MHz, Chloroform-d) δ 7.34 (d, J = 7.3 Hz, 2H), 7.22 (td, J = 7.3, 1.5 Hz, 1H), 7.04 (d, J = 7.4 Hz, 1H), 2.44 (s, 3H), 2.36 (s, 3H); <sup>13</sup>C NMR (126 MHz, Chloroform-d) δ 139.20 , 136.94 , 129.12 , 128.50 , 128.07 , 125.05 , 23.23 , 21.63 .

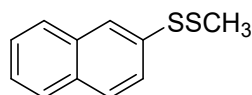

Chemical Formula: C<sub>11</sub>H<sub>10</sub>S<sub>2</sub>  
Exact Mass: 206.0224

1-Methyl-2-(naphthalen-2-yl)disulfane. **6k**, Purification by column chromatography on silica gel (petroleum ether) afforded a light yellow oil (77%, 63.4 mg). <sup>1</sup>H NMR (500 MHz, Chloroform-d) δ 7.99 (d, J = 1.8 Hz, 1H), 7.80 (t, J = 9.3 Hz, 3H), 7.61 (dd, J = 8.7, 1.9 Hz, 1H), 7.53 – 7.42 (m, 2H), 2.48 (s, 3H); <sup>13</sup>C NMR (126 MHz, Chloroform-d) δ 134.37 , 133.79 , 132.63 , 129.13 , 128.03 , 127.59 , 126.96 , 126.44 , 126.31 , 126.04 , 23.12 . HRMS (EI) Calcd. for C<sub>11</sub>H<sub>10</sub>S<sub>2</sub> 206.0224, found 206.0226.

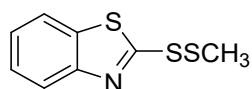

Chemical Formula: C<sub>8</sub>H<sub>7</sub>NS<sub>3</sub>  
Exact Mass: 212.9741

2-(Methylthio)benzo[d]thiazole. **6l**, Purification by column chromatography on silica gel (petroleum ether/Ethyl acetate=10:1, v/v) afforded a yellow oil (80%, 68.2 mg). <sup>1</sup>H NMR (500 MHz, Chloroform-d) δ 7.88 (d, J = 8.2 Hz, 1H), 7.84 – 7.79 (m, 1H), 7.47 – 7.40 (m, 1H), 7.37 – 7.31 (m, 1H), 2.68 (s, 3H); <sup>13</sup>C NMR (126 MHz, Chloroform-d) δ 172.54 , 155.43 , 136.11 , 126.50 , 124.84 , 122.44 , 121.41 , 23.77 . HRMS (EI) Calcd. for C<sub>8</sub>H<sub>7</sub>NS<sub>3</sub> 212.9741, found 212.9745.

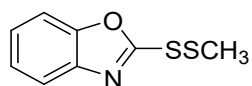

Chemical Formula: C<sub>8</sub>H<sub>7</sub>NOS<sub>2</sub>  
Exact Mass: 196.9969

2-(Methylthio)benzo[d]oxazole. **6m**, Purification by column chromatography on silica gel (petroleum ether/Ethyl acetate=10:1, v/v) afforded a light yellow oil (83%, 65.4 mg). <sup>1</sup>H NMR (500 MHz, Chloroform-d) δ 7.71 – 7.68 (m, 1H), 7.52 – 7.48 (m, 1H), 7.34 – 7.29 (m, 2H), 2.72 (s, 3H); <sup>13</sup>C NMR (126 MHz, Chloroform-d) δ 163.65 , 152.74 , 142.14 , 125.00 , 124.87 , 119.63 , 110.53 , 23.85 . HRMS (EI) Calcd. for C<sub>8</sub>H<sub>7</sub>NOS<sub>2</sub> 196.9969, found 196.9973.

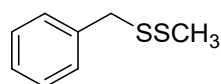

Chemical Formula: C<sub>8</sub>H<sub>10</sub>S<sub>2</sub>  
Exact Mass: 170.0224

1-Benzyl-2-methylthioethane. **6n**<sup>11</sup>, Purification by column chromatography on silica gel (petroleum ether) afforded a colorless oil (76%, 51.7 mg). <sup>1</sup>H NMR (500 MHz, Chloroform-d) δ 7.28 (d, J = 6.0 Hz, 2H), 7.25 (d, J = 7.6 Hz, 2H), 7.22 – 7.18 (m, 1H), 3.84 (s, 2H), 2.04 (s, 3H); <sup>13</sup>C NMR (126 MHz, Chloroform-d) δ 137.78 , 129.55 , 128.76 , 127.63 , 43.26 , 23.25 .

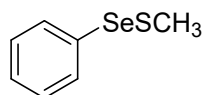

Chemical Formula: C<sub>7</sub>H<sub>8</sub>SSe  
Exact Mass: 203.9512

Methyl(phenylselanyl)sulfane. **60**<sup>10</sup>, Purification by column chromatography on silica gel (petroleum ether) afforded a yellow oil (65%, 53.0 mg). <sup>1</sup>H NMR (500 MHz, Chloroform-d) δ 7.70 – 7.64 (m, 2H), 7.40 – 7.35 (m, 2H), 7.33 (dd, J = 8.1, 1.9 Hz, 1H), 2.67 (s, 3H); <sup>13</sup>C NMR (126 MHz, Chloroform-d) δ 131.78 , 130.36 , 129.47 , 127.71 , 29.95 .

### 3.5 General procedures for methylthiolation of *H*-phosphineoxides

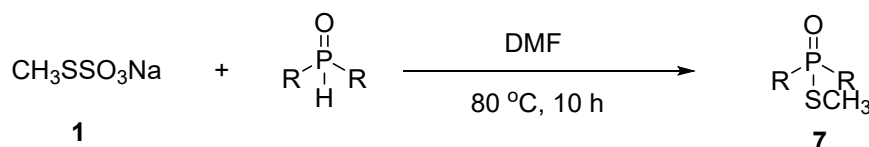

A flask was charged with *H*-phosphineoxides (0.4 mmol, 1.0 equiv), sodium *S*-methyl sulfothioate **1** (99 mg, 0.6 mmol, 1.5 equiv) and DMF (4 mL). The reaction mixture was stirred at 80 °C or 30 °C for 10-24 h. After completion of the reaction as monitored by TLC, the mixture was cooled to room temperature, poured into EtOAc (20 mL) and H<sub>2</sub>O (20 mL), and extracted several times with EtOAc (3 \*15 mL). The combined organic layers were washed with water and brine, dried over Na<sub>2</sub>SO<sub>4</sub>, and filtered. The solvent was removed in vacuum and the residue was purified by column chromatography (silica gel, Petroleum ether/ Ethyl acetate) to afford the methylthiolated *H*-phosphineoxide **7**.

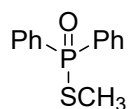

Chemical Formula: C<sub>13</sub>H<sub>13</sub>OPS  
Exact Mass: 248.0425

*S*-Methyl diphenylphosphinothioate. **7a**<sup>12</sup>, Purification by column chromatography on silica gel (petroleum ether/Ethyl acetate=30:1, v/v) afforded a colorless oil (85%, 84.3 mg). <sup>1</sup>H NMR (500 MHz, Chloroform-d) δ 7.93 – 7.82 (m, 4H), 7.61 – 7.41 (m, 6H), 2.24 (d, J = 12.1 Hz, 3H); <sup>13</sup>C NMR (126 MHz, Chloroform-d) δ 133.38 , 132.57 , 131.73 (d, J = 10.6 Hz), 128.94 (d, J = 13.2 Hz), 10.82 .

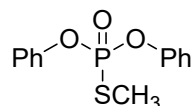

Chemical Formula: C<sub>13</sub>H<sub>13</sub>O<sub>3</sub>PS  
Exact Mass: 280.0323

*S*-Methyl *O,O*-diphenyl phosphorothioate. **7b**<sup>13</sup>, Purification by column chromatography on silica gel (petroleum ether/Ethyl acetate=10:1, v/v) afforded a yellow oil (73%, 81.8 mg). <sup>1</sup>H NMR (500 MHz, Chloroform-d) δ 7.38 (dd, J = 8.6, 7.2 Hz, 4H), 7.34 – 7.27 (m, 4H), 7.23 (td, J = 7.3, 1.2 Hz, 2H), 2.38 (d, J = 16.2 Hz, 3H); <sup>13</sup>C NMR (126 MHz, Chloroform-d) δ 150.51 , 130.11 , 125.89 , 120.85 , 13.26 .

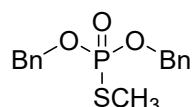

Chemical Formula: C<sub>15</sub>H<sub>17</sub>O<sub>3</sub>PS  
Exact Mass: 308.0636

*O,O*-Dibenzyl *S*-methyl phosphorothioate. **7c**, Purification by column chromatography on silica gel (petroleum ether/Ethyl acetate=10:1, v/v) afforded a

light yellow oil (76%, 93.6 mg). <sup>1</sup>H NMR (500 MHz, Chloroform-d)  $\delta$  7.43 – 7.28 (m, 10H), 5.21 – 5.05 (m, 4H), 2.19 (d, J = 15.3 Hz, 3H); <sup>13</sup>C NMR (126 MHz, Chloroform-d)  $\delta$  135.73 , 135.67 , 128.82 , 128.29 , 69.11 (d, J = 5.7 Hz), 12.54 . HRMS (EI) Calcd. for C<sub>15</sub>H<sub>17</sub>O<sub>3</sub>PS 308.0636, found 308.0644.

### 3.6 General procedures for gram-Scale Synthesis

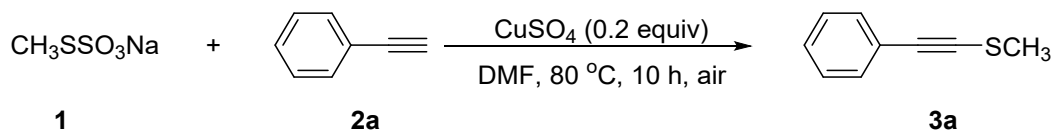

A 50 mL flask was charged with phenyl-acetylene 2a (1.04 g, 10.0 mmol, 1.0 equiv), sodium *S*-methyl sulfonothioate 1 (2.3 g, 15.0 mmol, 1.5 equiv), CuSO<sub>4</sub> (32 mg, 2.0 mmol, 0.2 equiv) and DMF (20 mL). The reaction mixture was stirred at 80 °C in air for 10 h. After completion of the reaction as monitored by TLC, the mixture was cooled to room temperature, poured into EtOAc (80 mL) and H<sub>2</sub>O (20 mL), and extracted several times with EtOAc (3 \*50 mL). The combined organic layers were washed with water and brine, dried over Na<sub>2</sub>SO<sub>4</sub>, and filtered. The solvent was removed in vacuum and the residue was purified by column chromatography (silica gel, Petroleum ether) to afford the methylthiolated alkene 3a as light yellow oil (1.02g, 69%).

### 3.7 General procedures for methylthiolation of erlotinib

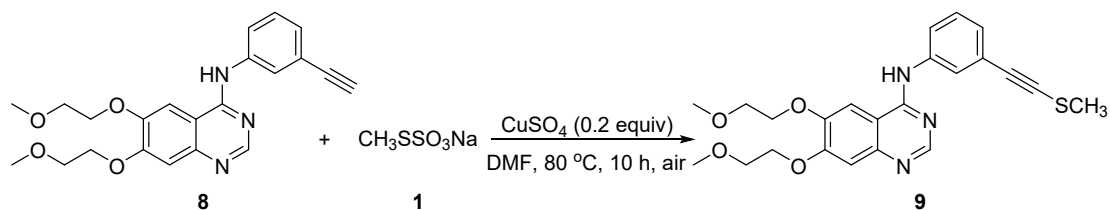

A flask was charged with erlotinib (162.0 mg, 0.4 mmol, 1.0 equiv), sodium *S*-methyl sulfonothioate 1 (99 mg, 0.6 mmol, 1.5 equiv), CuSO<sub>4</sub> (12.8 mg, 0.08 mmol, 0.2 equiv) and DMF (4 mL). The reaction mixture was stirred at 80 °C in air for 10 h. After completion of the reaction as monitored by TLC, the mixture was cooled to room temperature, poured into EtOAc (20 mL) and H<sub>2</sub>O (20 mL), and extracted several times with EtOAc (3 \*15 mL). The combined organic layers were washed with water and brine, dried over Na<sub>2</sub>SO<sub>4</sub>, and filtered. The solvent was removed in vacuum and the residue was purified by column chromatography (silica gel, Petroleum ether/ Ethyl acetate =1:50, v/v) to afford the methylthiolated erlotinib 9.

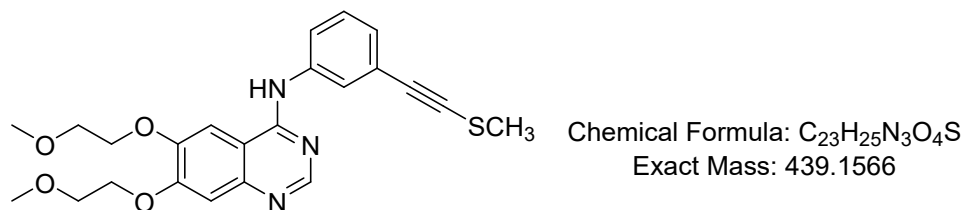

6,7-Bis(2-methoxyethoxy)-*N*-(3-((methylthio)ethynyl)phenyl)quinazolin-4-amine. **9**, a white solid (93%, 163.3 mg). Mp: 113-115 °C. <sup>1</sup>H NMR (500 MHz, Chloroform-*d*) δ 8.63 (s, 1H), 7.77 (s, 1H), 7.73 (s, 1H), 7.67 (dd, *J* = 8.1, 2.1 Hz, 1H), 7.29 (t, *J* = 7.9 Hz, 1H), 7.25 (s, 1H), 7.20 – 7.11 (m, 2H), 4.20 (dt, *J* = 11.6, 4.5 Hz, 4H), 3.79 (q, *J* = 5.1 Hz, 4H), 3.43 (s, 6H), 2.48 (s, 3H); <sup>13</sup>C NMR (126 MHz, Chloroform-*d*) δ 156.58, 154.61, 153.79, 148.91, 147.64, 139.04, 129.13, 127.30, 124.60, 124.27, 121.85, 109.41, 108.79, 102.71, 91.86, 81.54, 71.11, 70.60, 69.21, 68.42, 59.48, 59.41, 19.59. HRMS (EI) Calcd. for C<sub>23</sub>H<sub>25</sub>N<sub>3</sub>O<sub>4</sub>S 439.1566, found 439.1561.

- [1] Su, Q.; Zhao, Z.-J.; Xu, F.; Lou, P.-C.; Zhang, K.; Xie, D.-X.; Shi, L.; Cai, Q.-Y.; Peng, Z.-H.; An, D.-L. *Eur. J. Org. Chem.* **2013**, 2013, 1551.
- [2] Melzig, L.; Metzger, A.; Knochel, P. *Chem. Eur. J.* **2011**, 17, 2948.
- [3] M, L.; Nielsen, M. F.; Hammerich, O. *Acta Chemica Scandinavica* **1995**, 49, 503.
- [4] L'Abbe, G.; Haelterman, B.; Dehaen, W. *J. Chem. Soc., Perkin Transactions 1* **1994**, 2203.
- [5] Raap, R.; Micetich, R. G. *Can. J. Chem.* **1968**, 46, 1057.
- [6] Harpp, D. N.; Smith, R. A. *J. Org. Chem.* **1979**, 44, 4140.
- [7] Tsutsumi, N.; Itoh, T.; Ohsawa, A. *Chem. Pharm. Bull.* **2000**, 48, 1524.
- [8] Somasundaram, N.; Pitchumani, K.; Srinivasan, C. *J. Chem. Soc., Chem. Commun.* **1994**, 1473.
- [9] Armitage, D. A.; Clark, M. J.; Tso, C. C. *J. Chem. Soc., Perkin Transactions 1* **1972**, 680.
- [10] Baerlocher, F. J.; Baerlocher, M. O.; Langler, R. F.; MacQuarrie, S. L.; Marchand, M. E. *Australian J. Chem.* **2000**, 53, 1.
- [11] Detty, M. R. *J. Org. Chem.* **1979**, 44, 4528.
- [12] Morimoto, T.; Nezu, Y.; Achiwa, K.; Sekiya, M. *J. Chem. Soc., Chem. Commun.* **1985**, 1584.
- [13] Xia, M.; Cheng, J. *Tetrahedron Lett.* **2016**, 57, 4702.

## 4. NMR Spectra

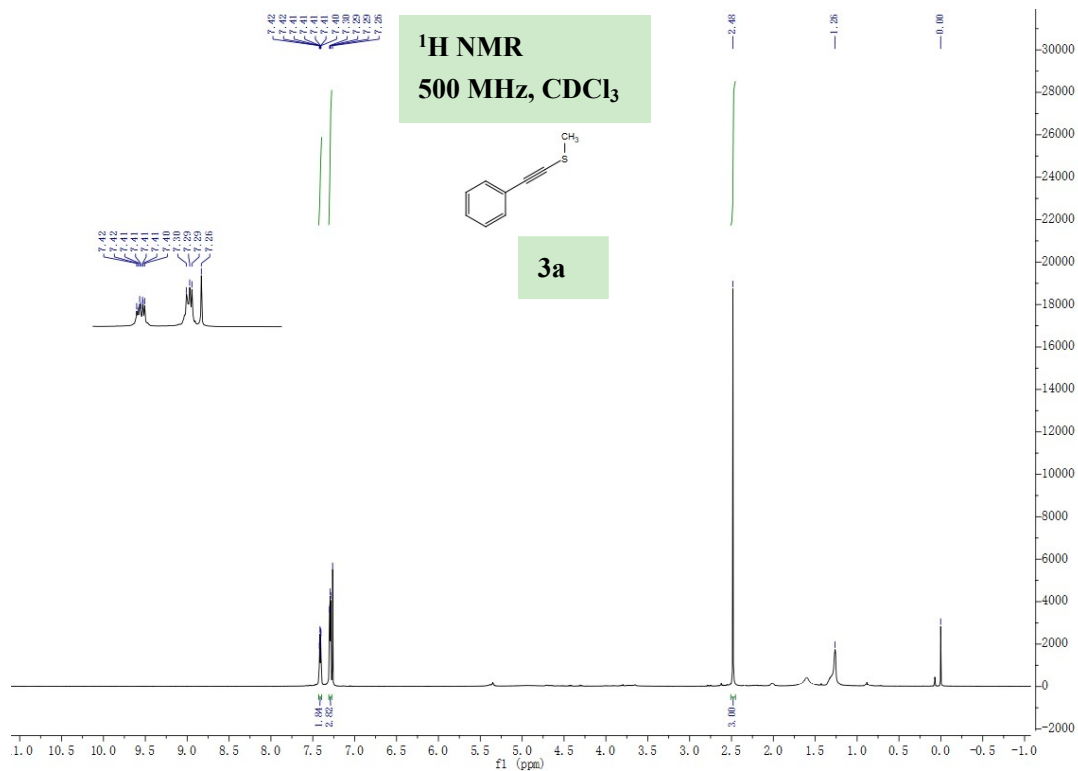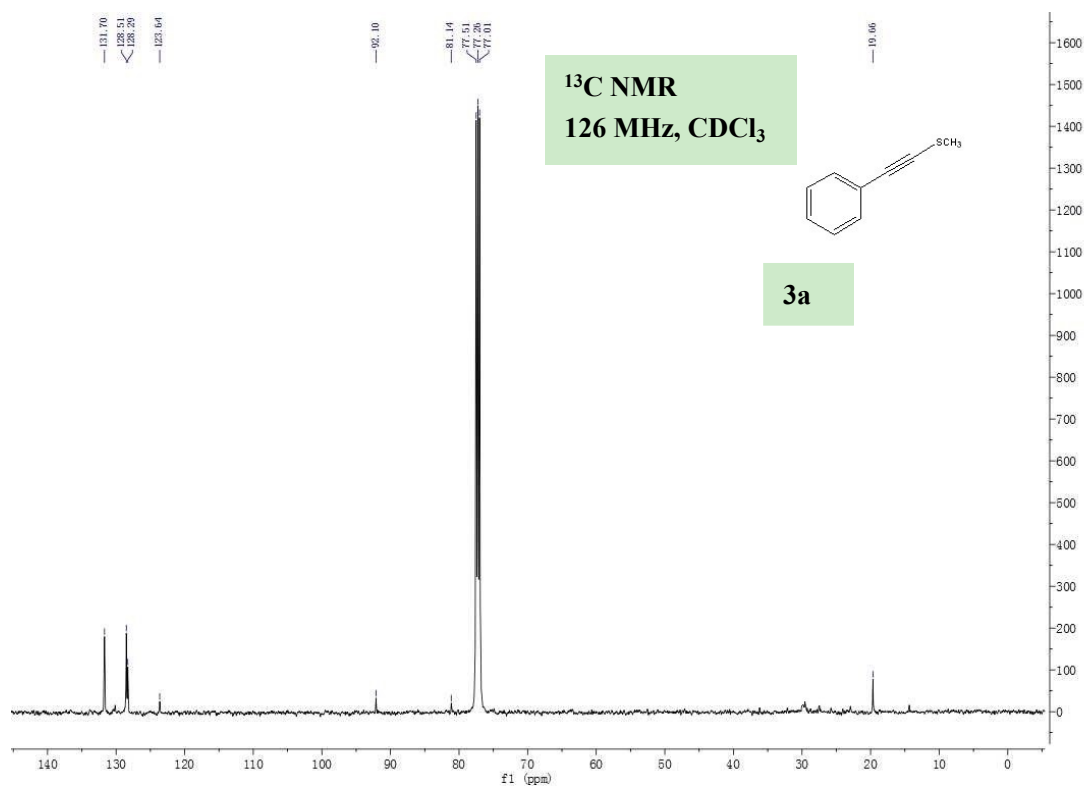



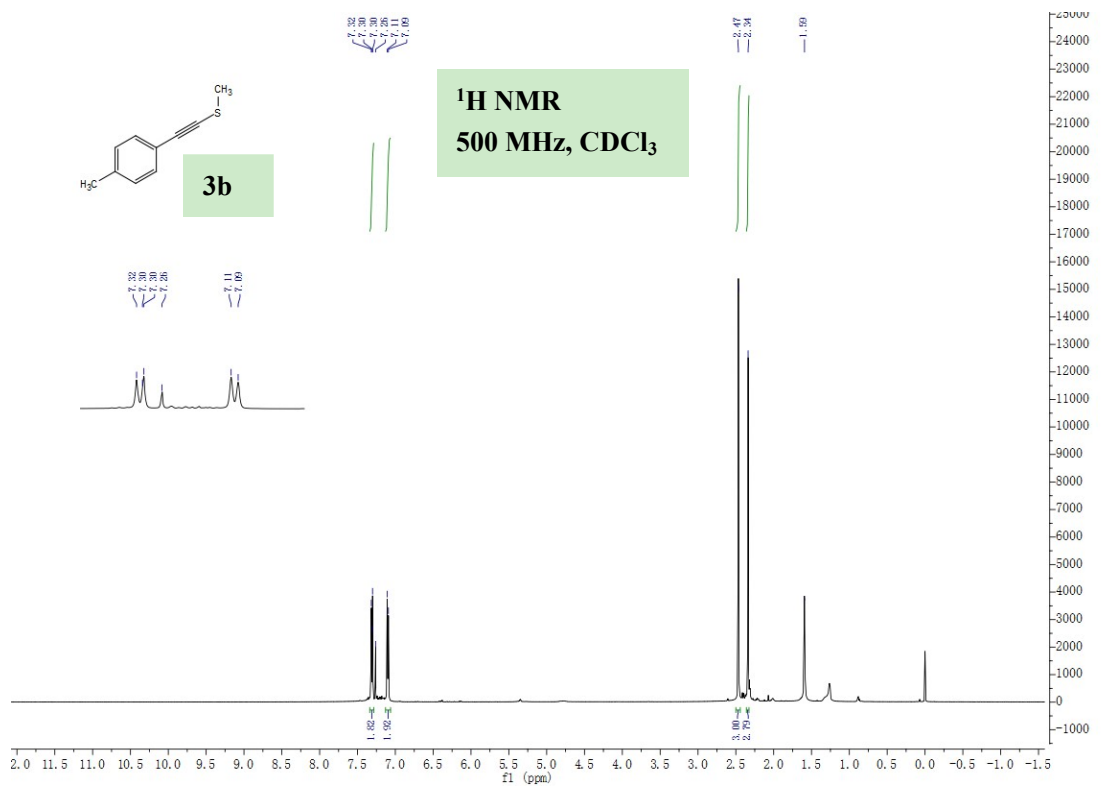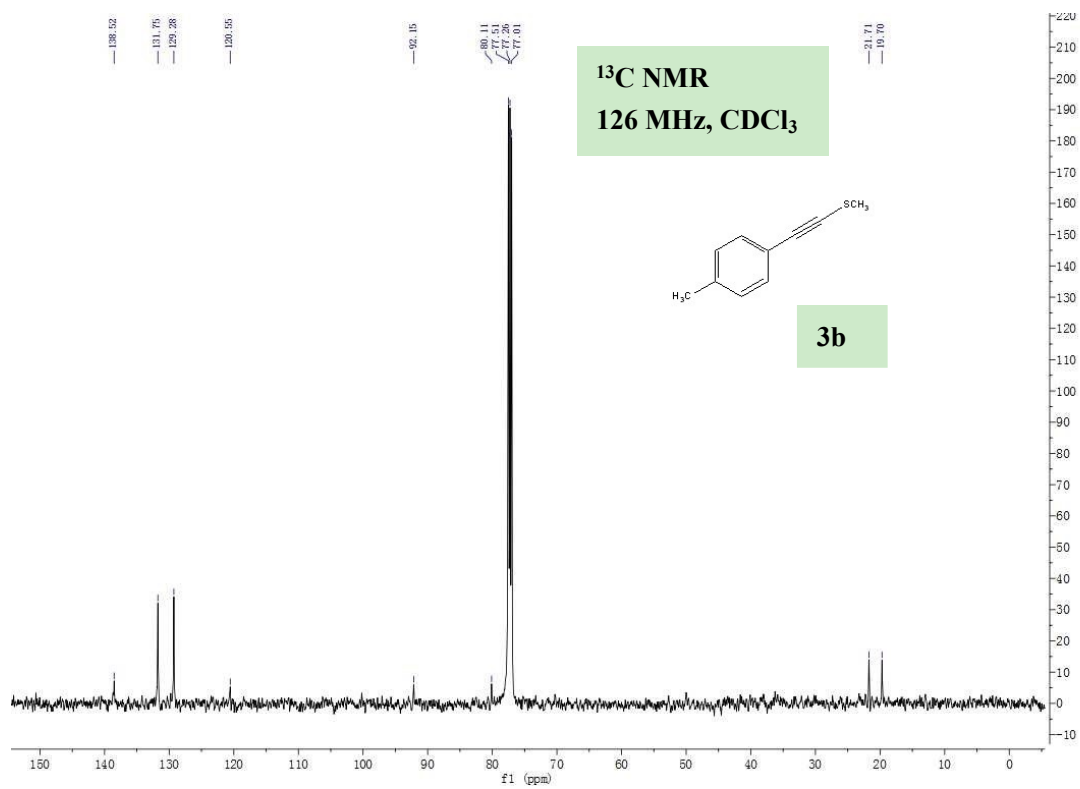

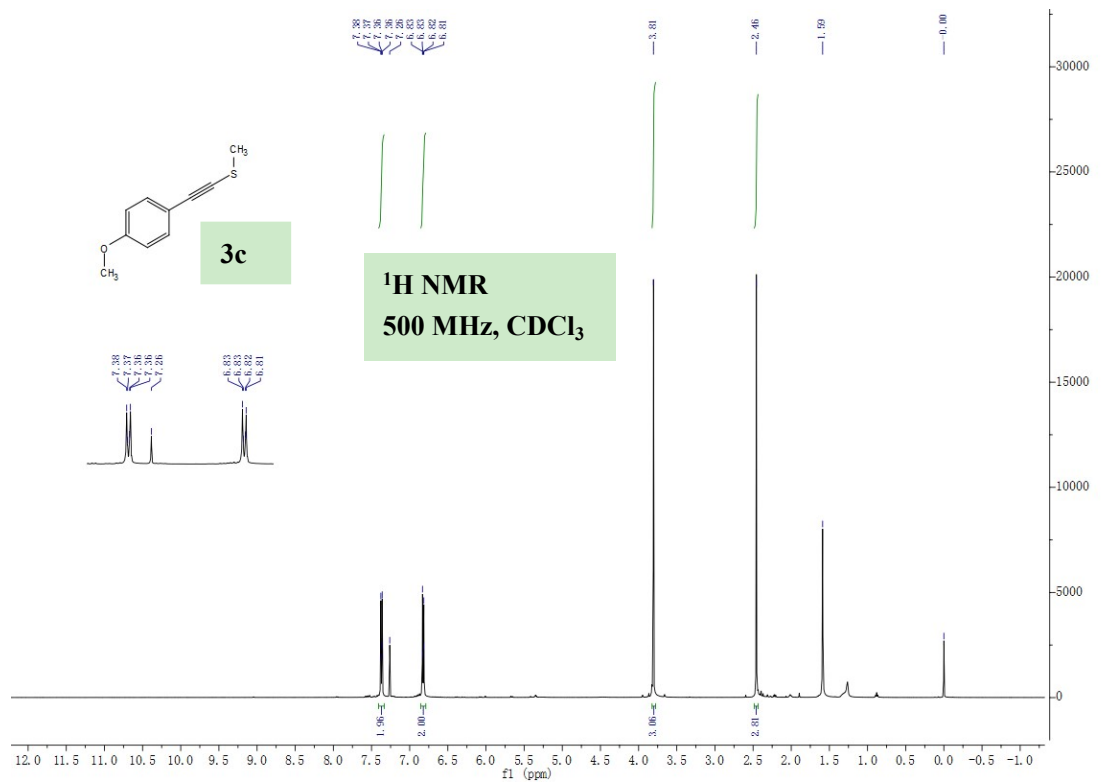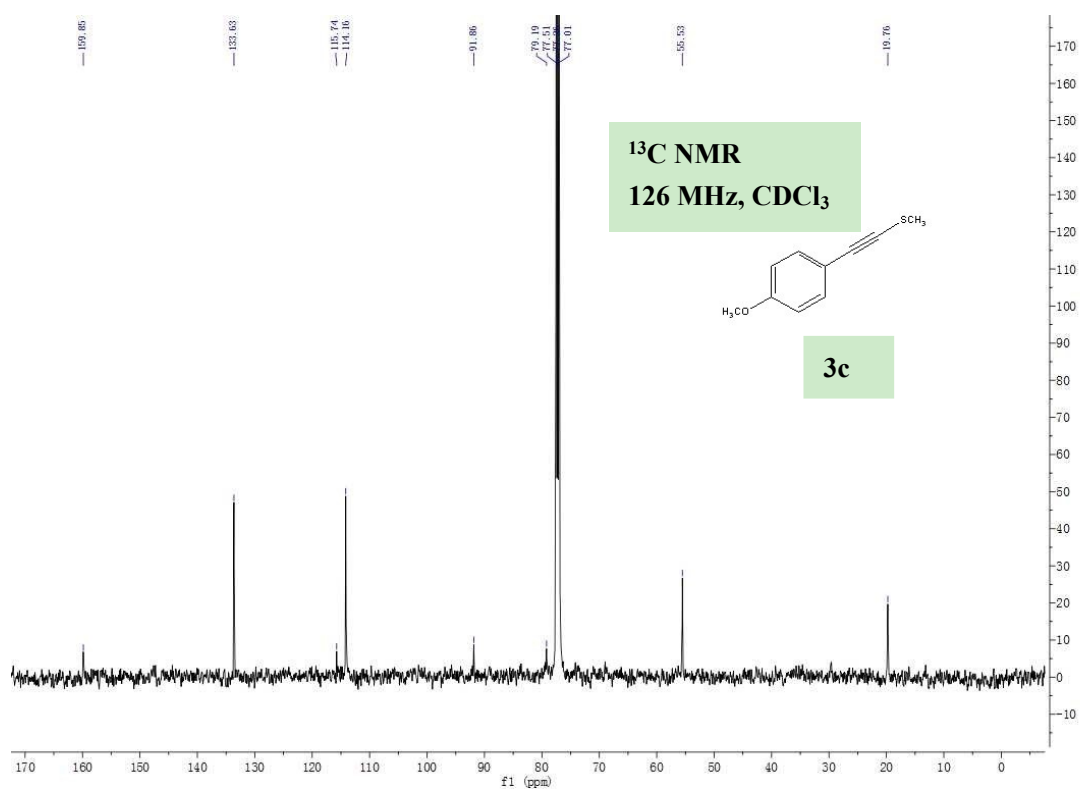

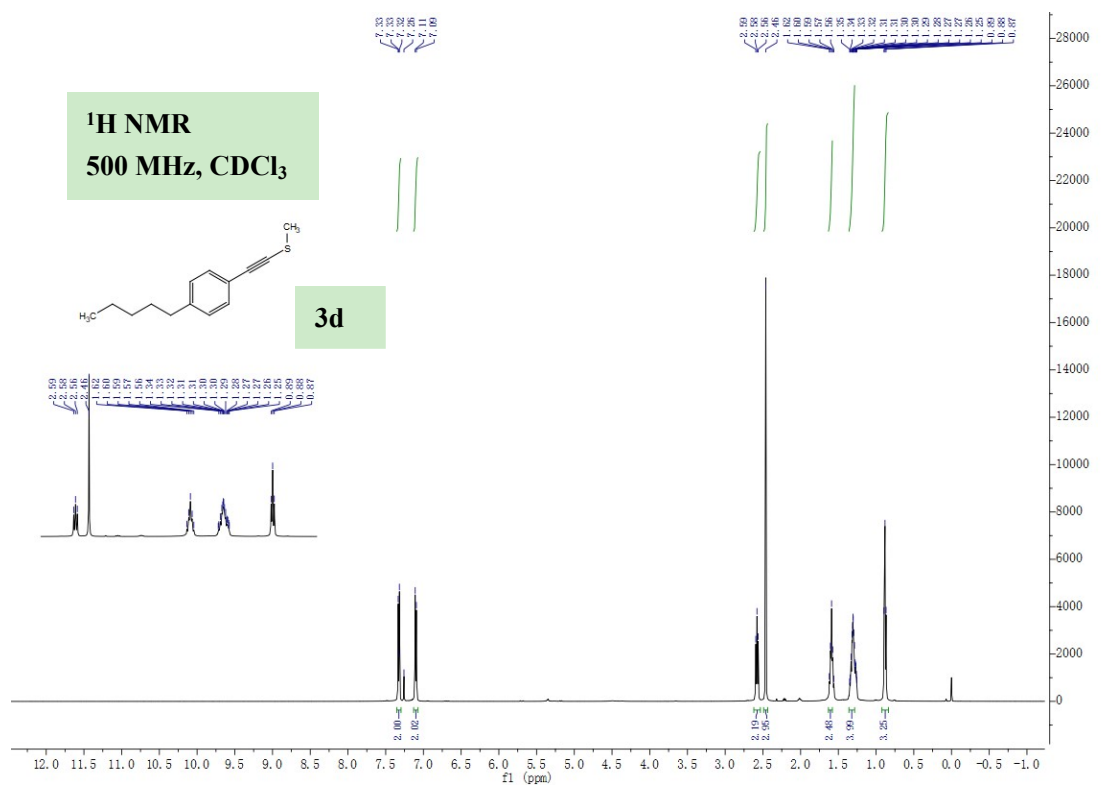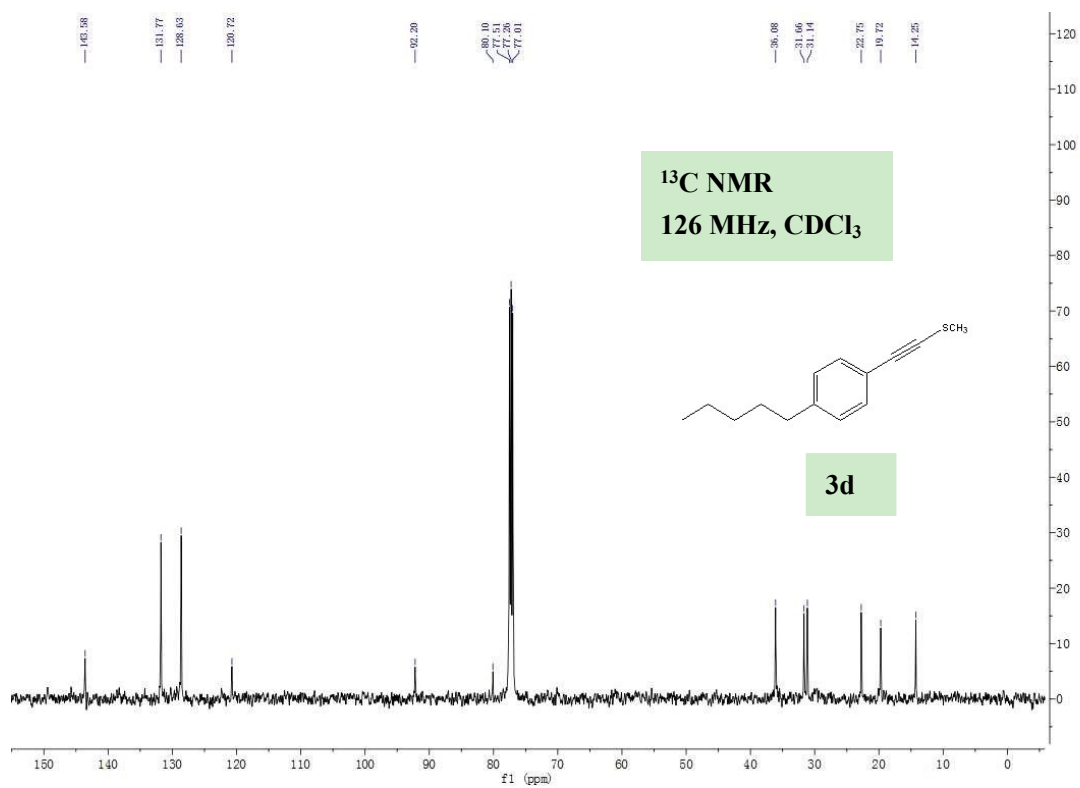

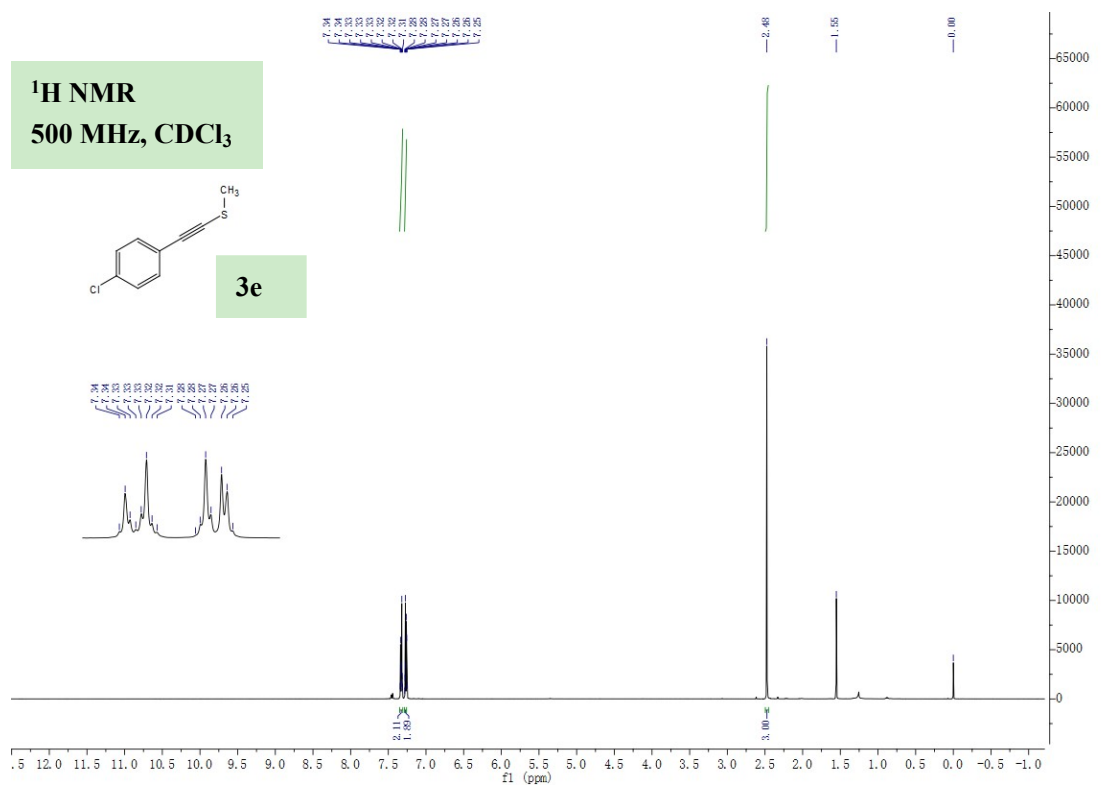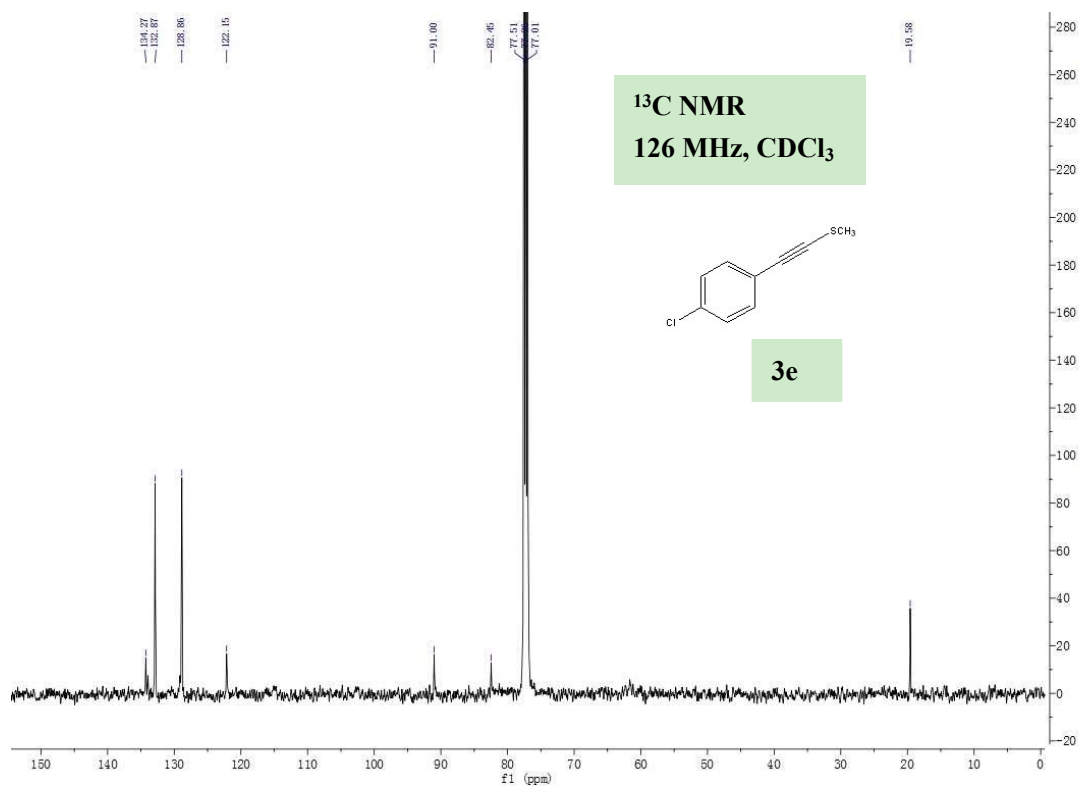

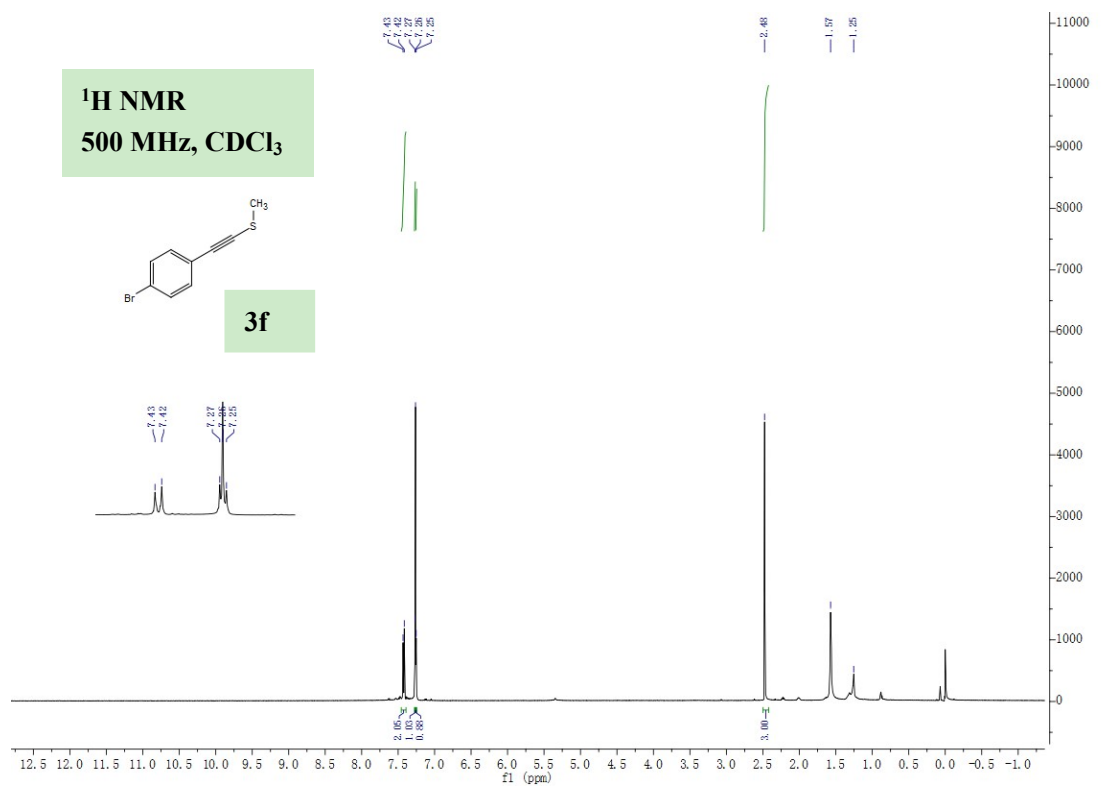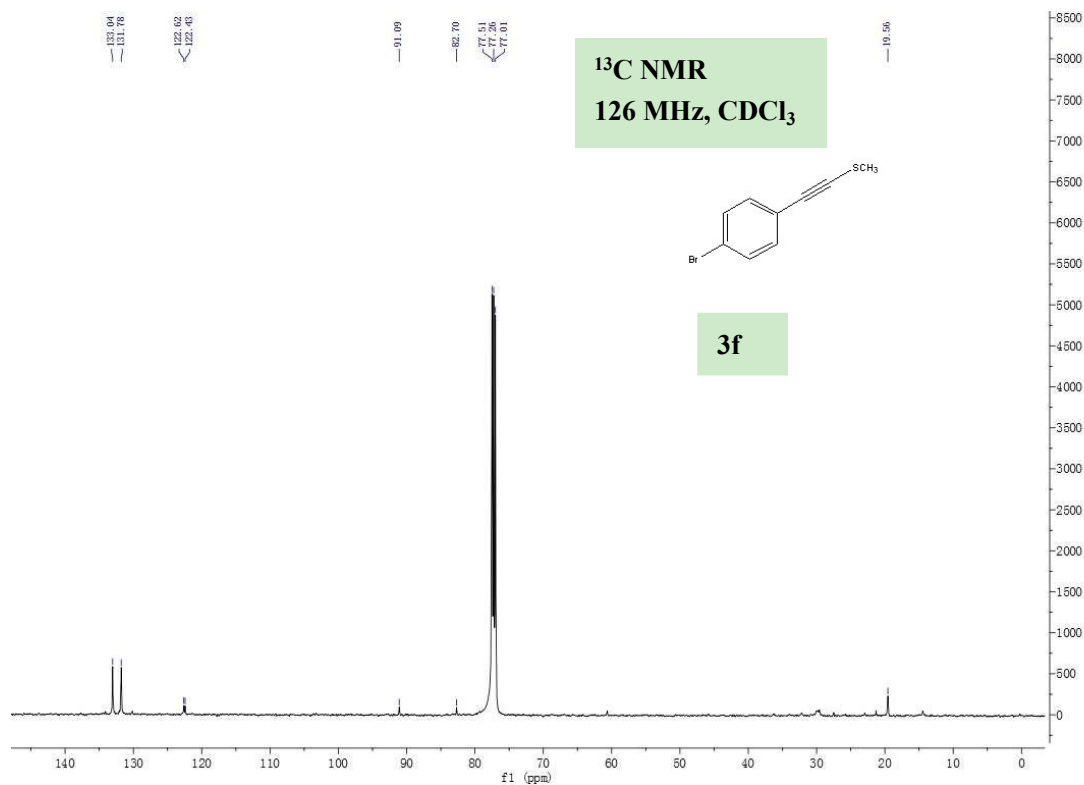

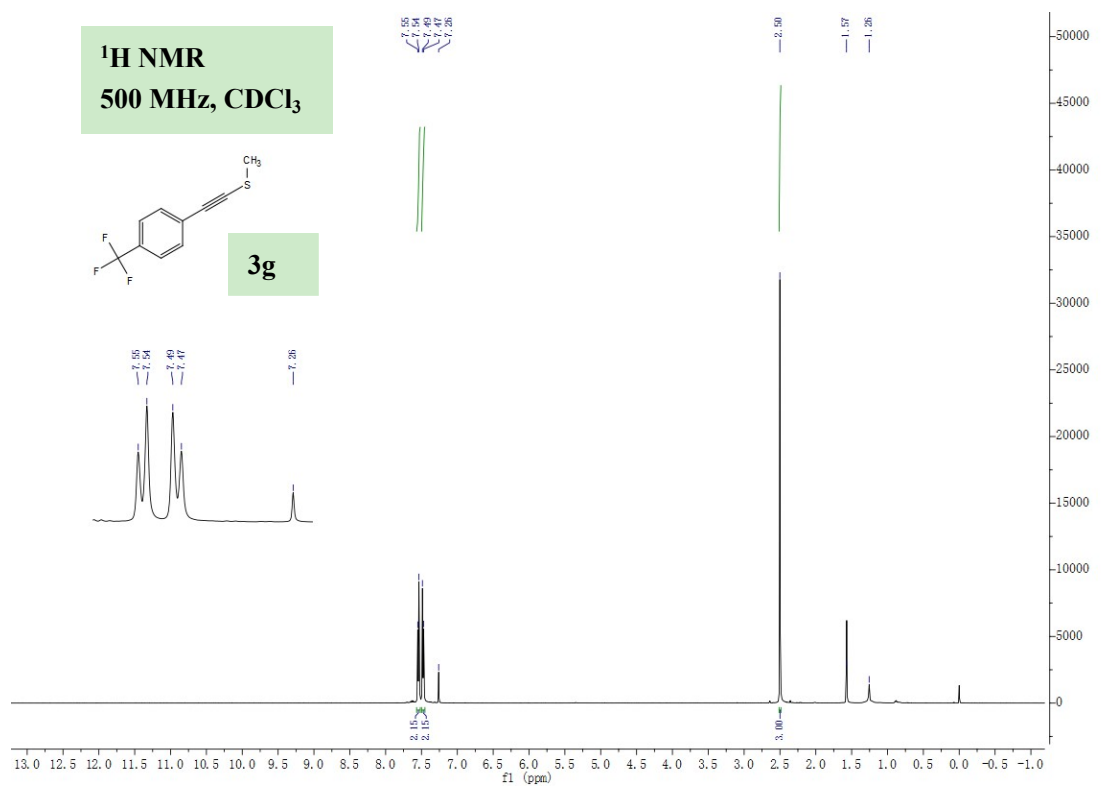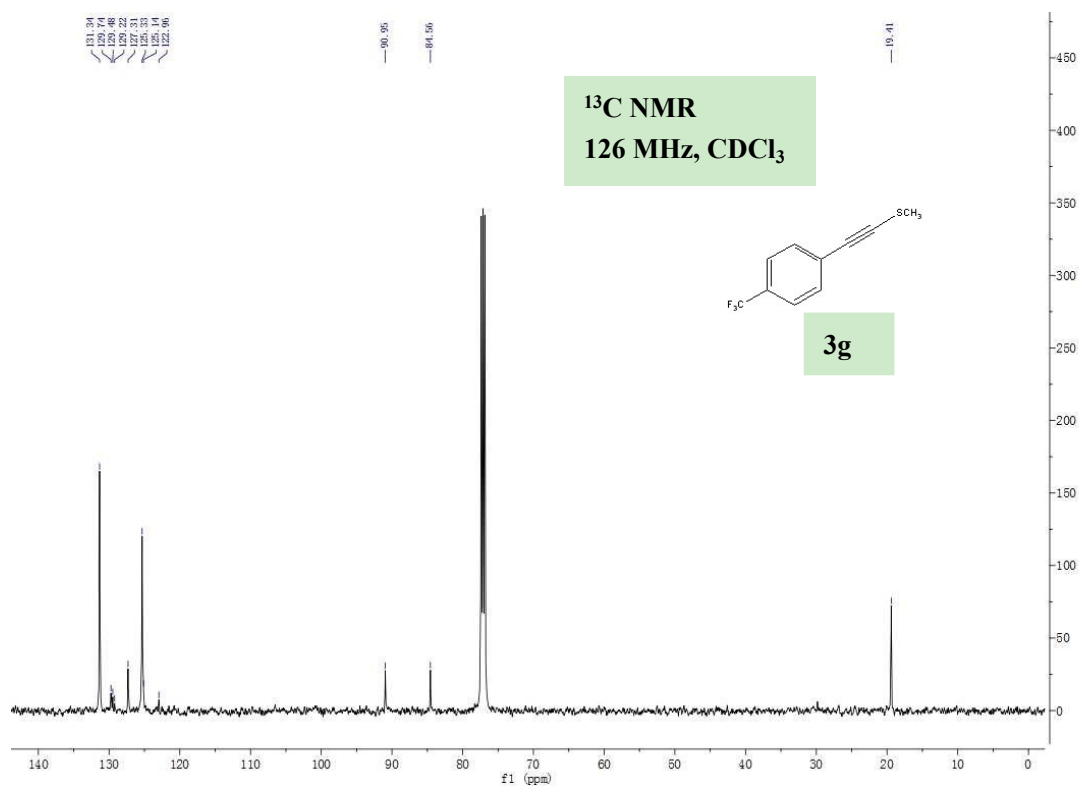

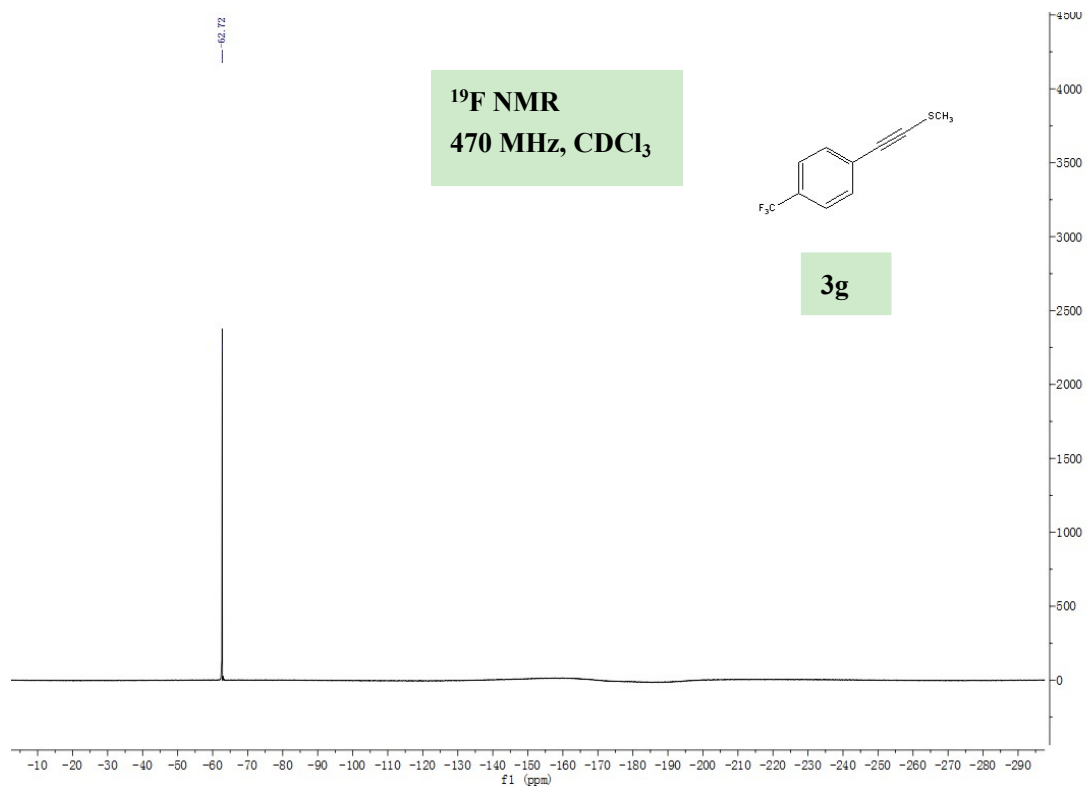

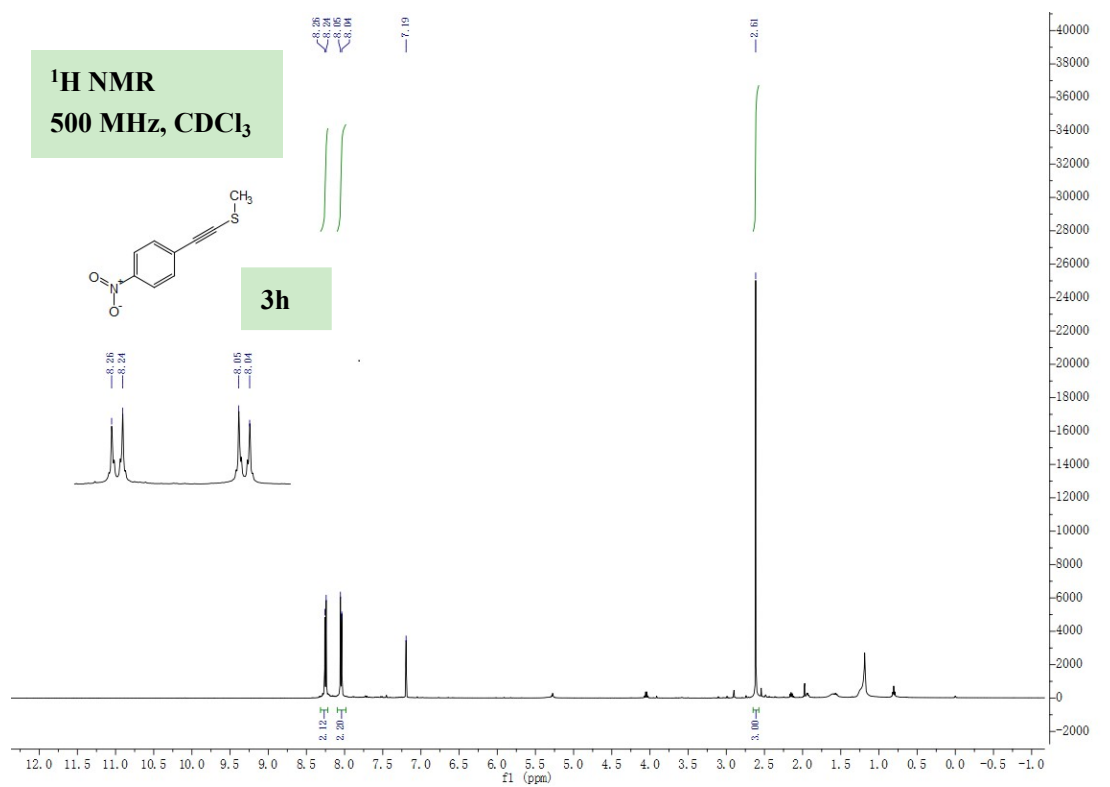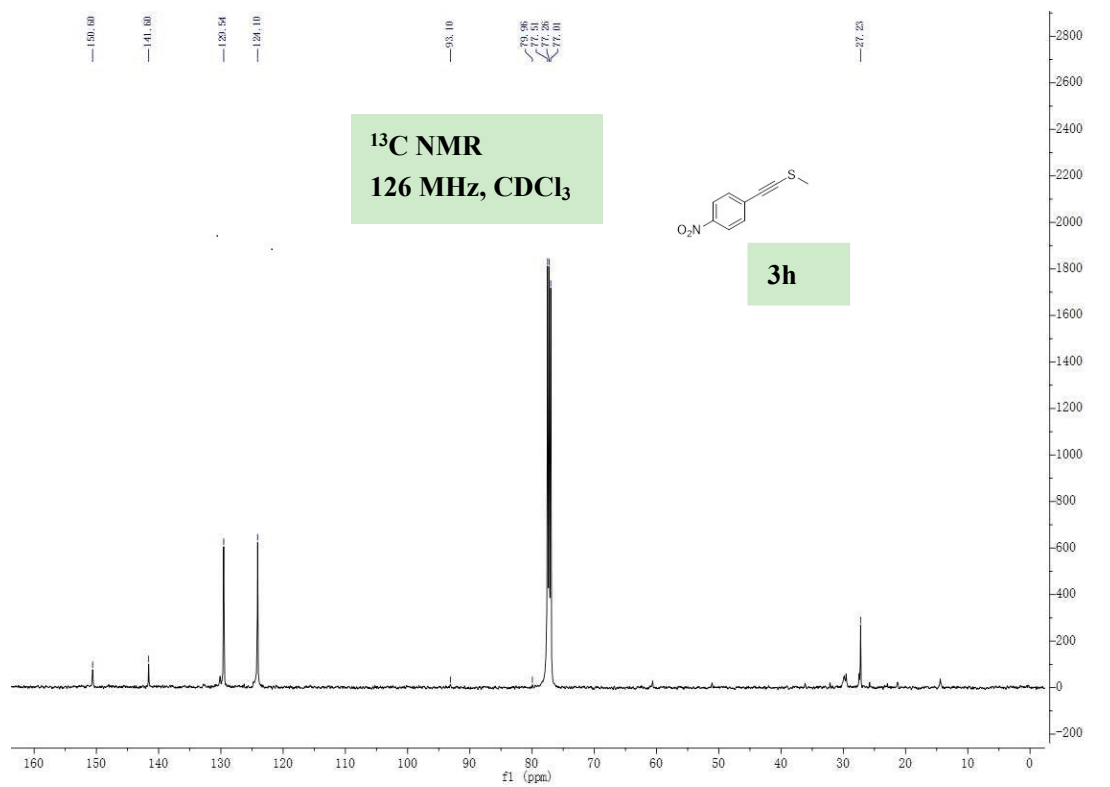



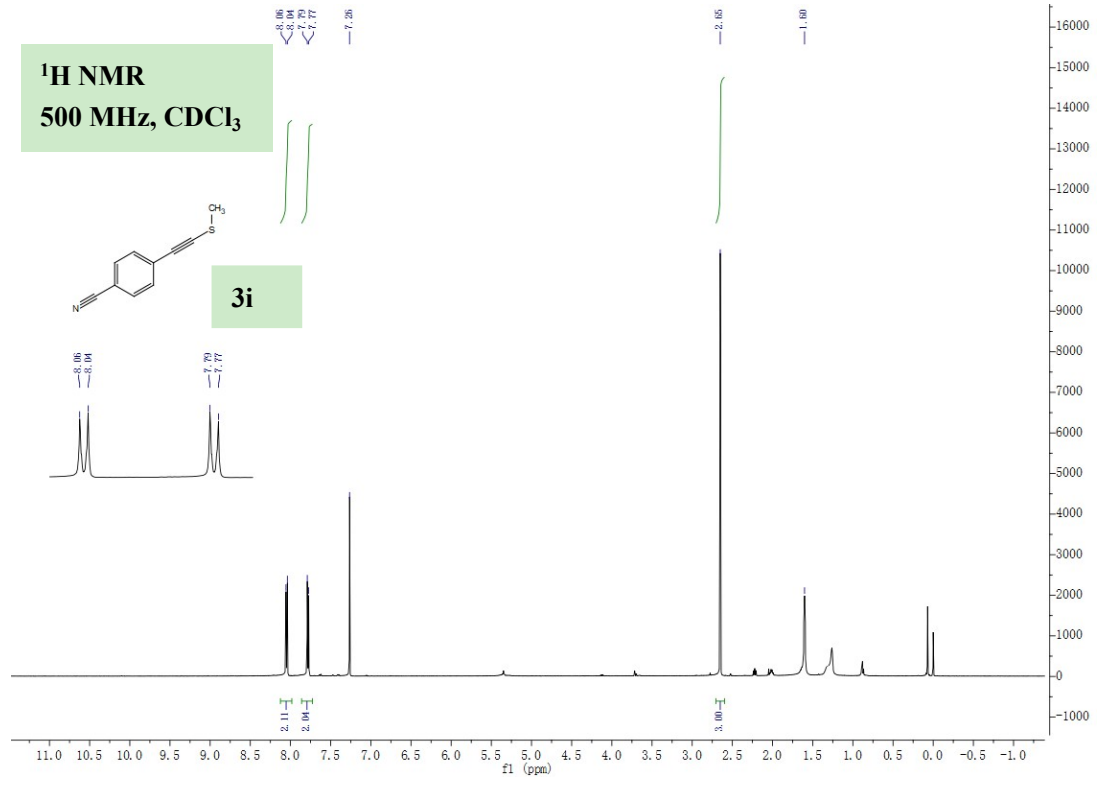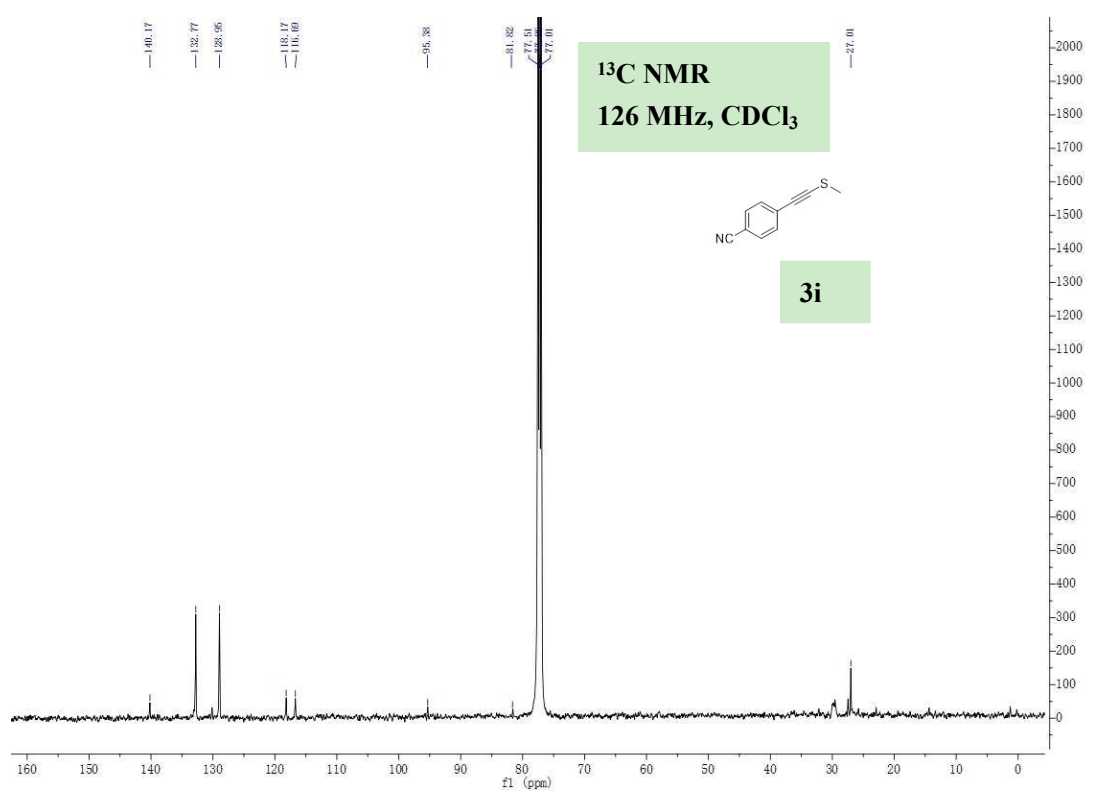

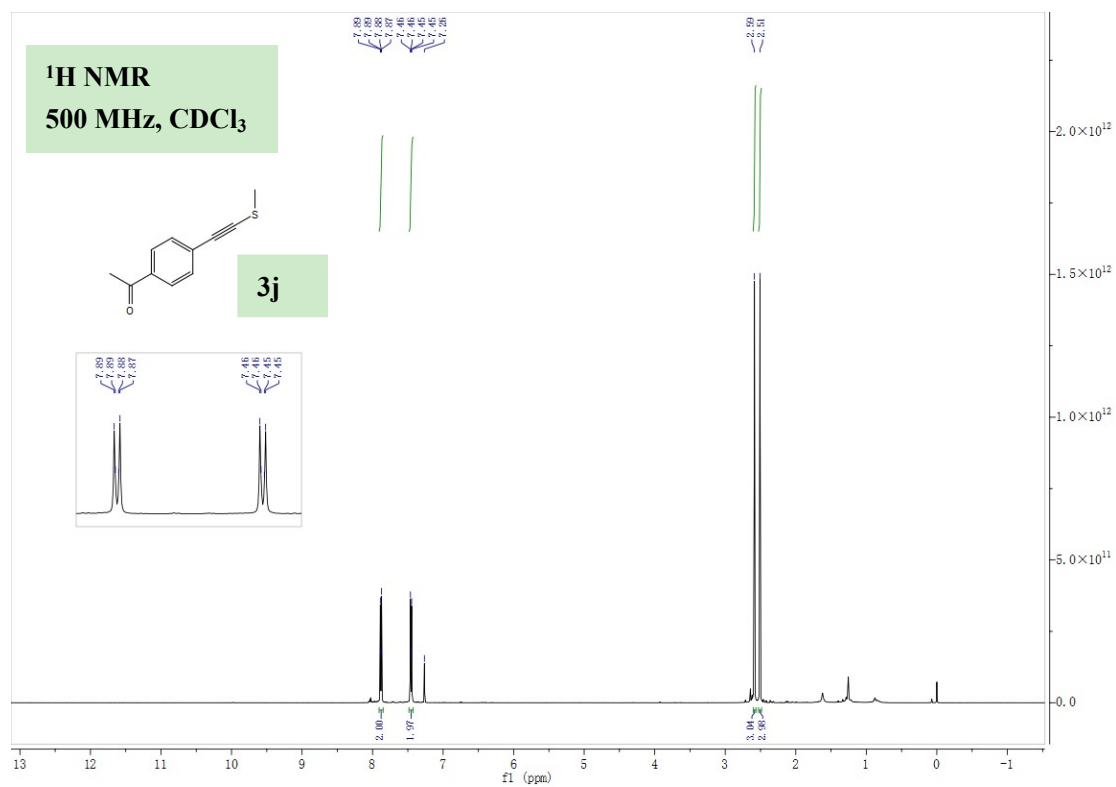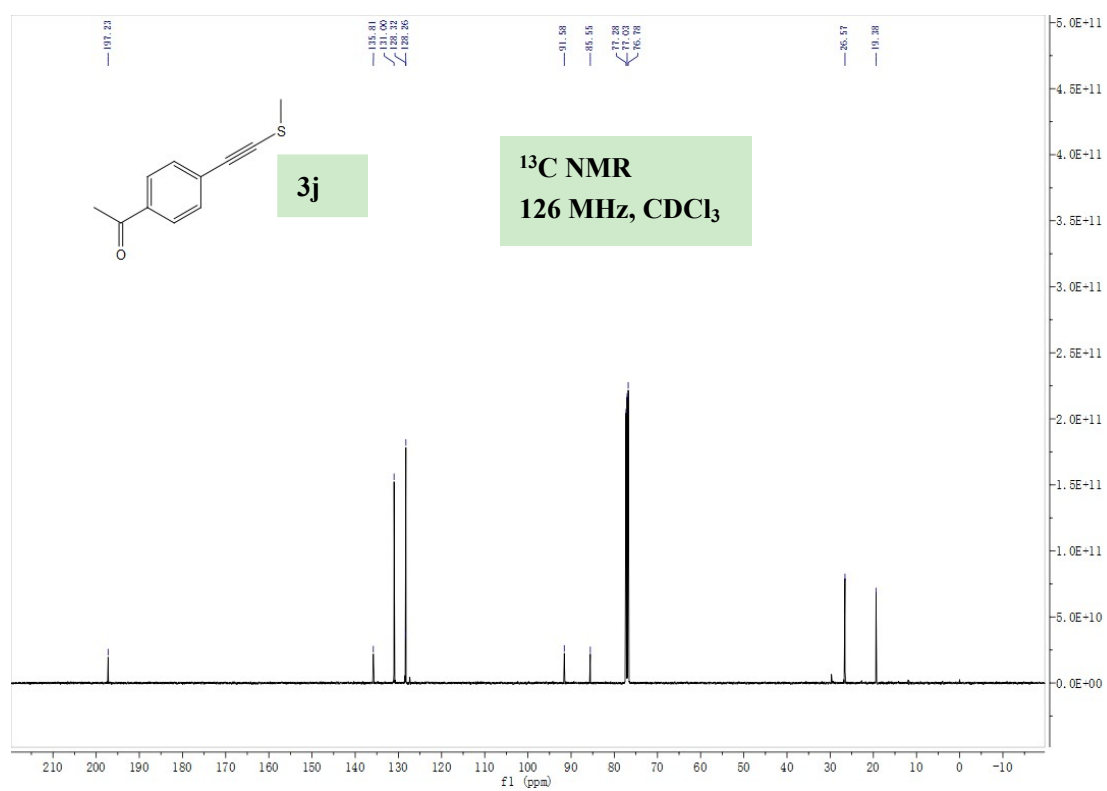

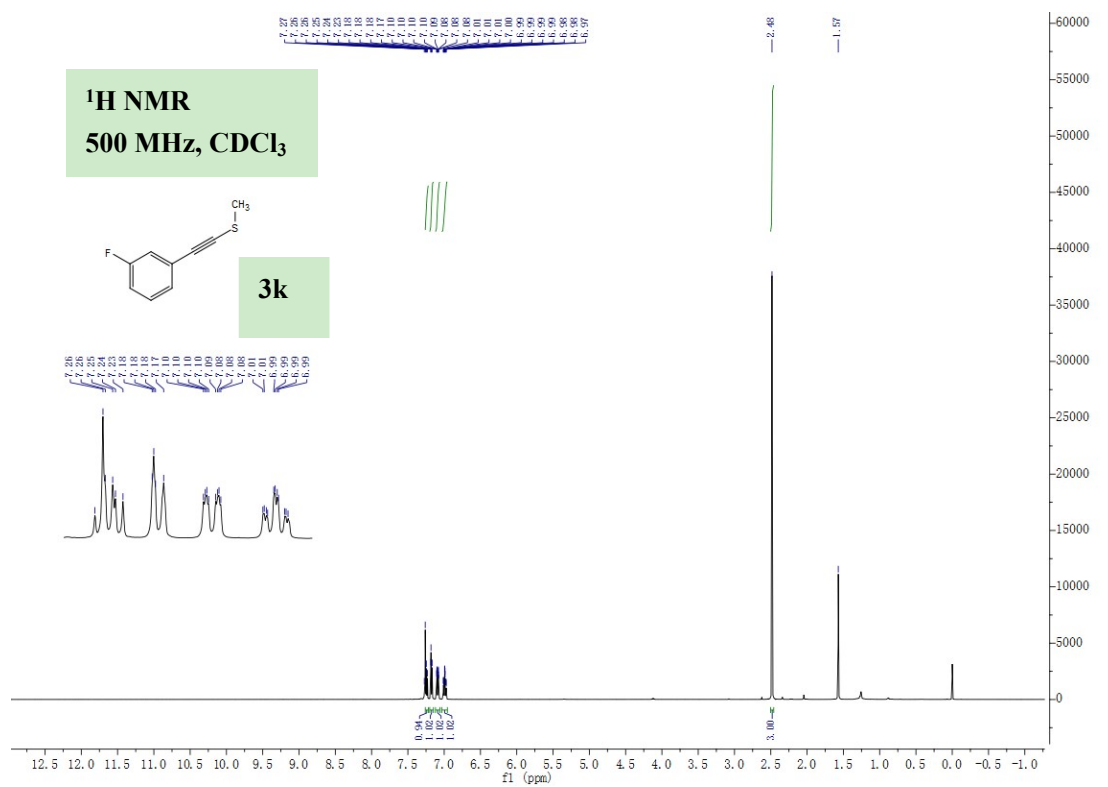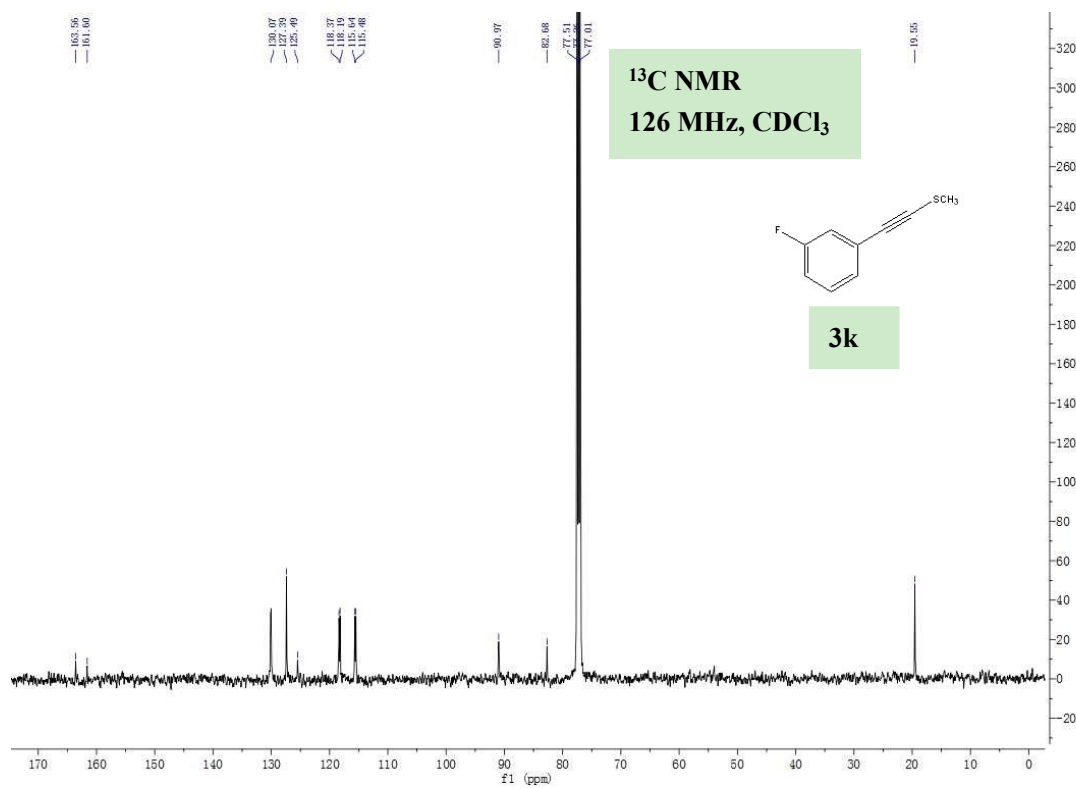

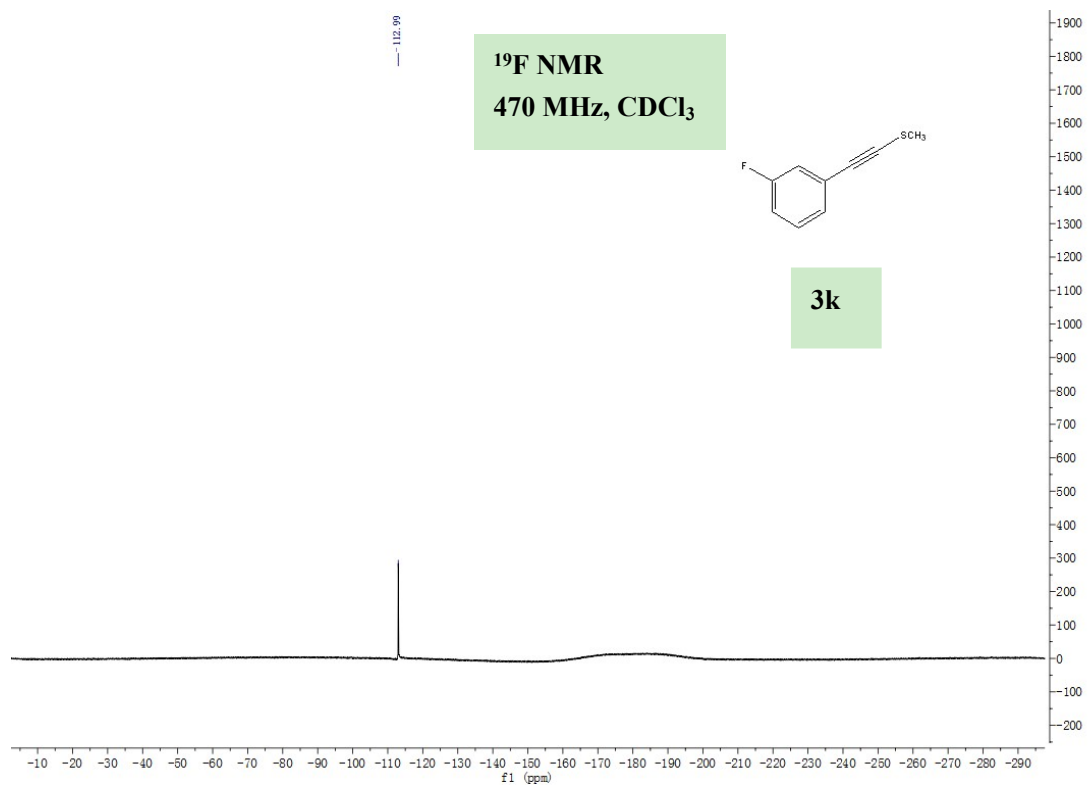

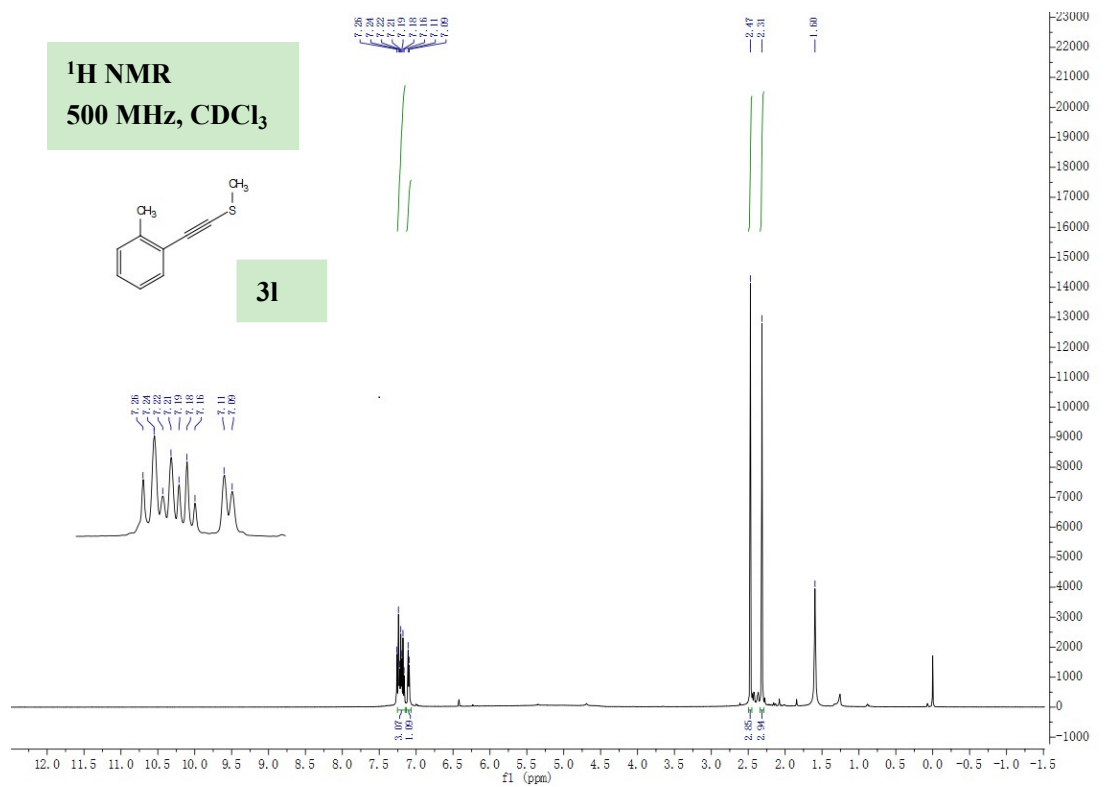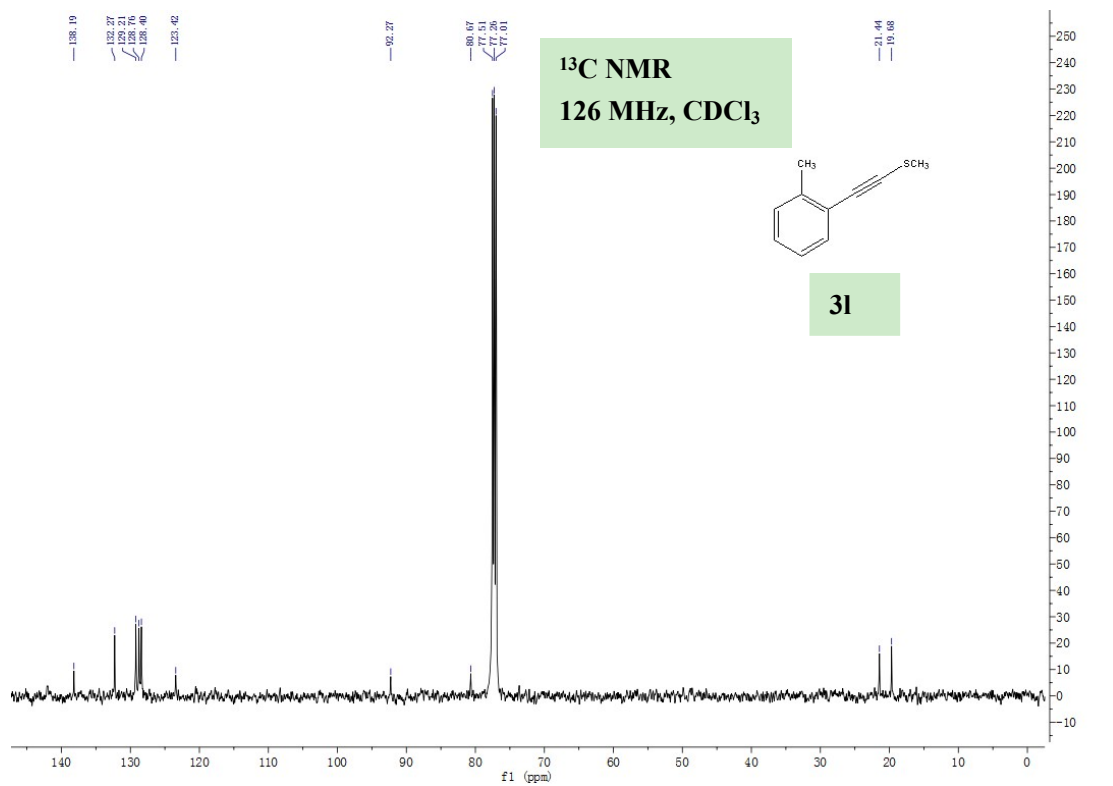

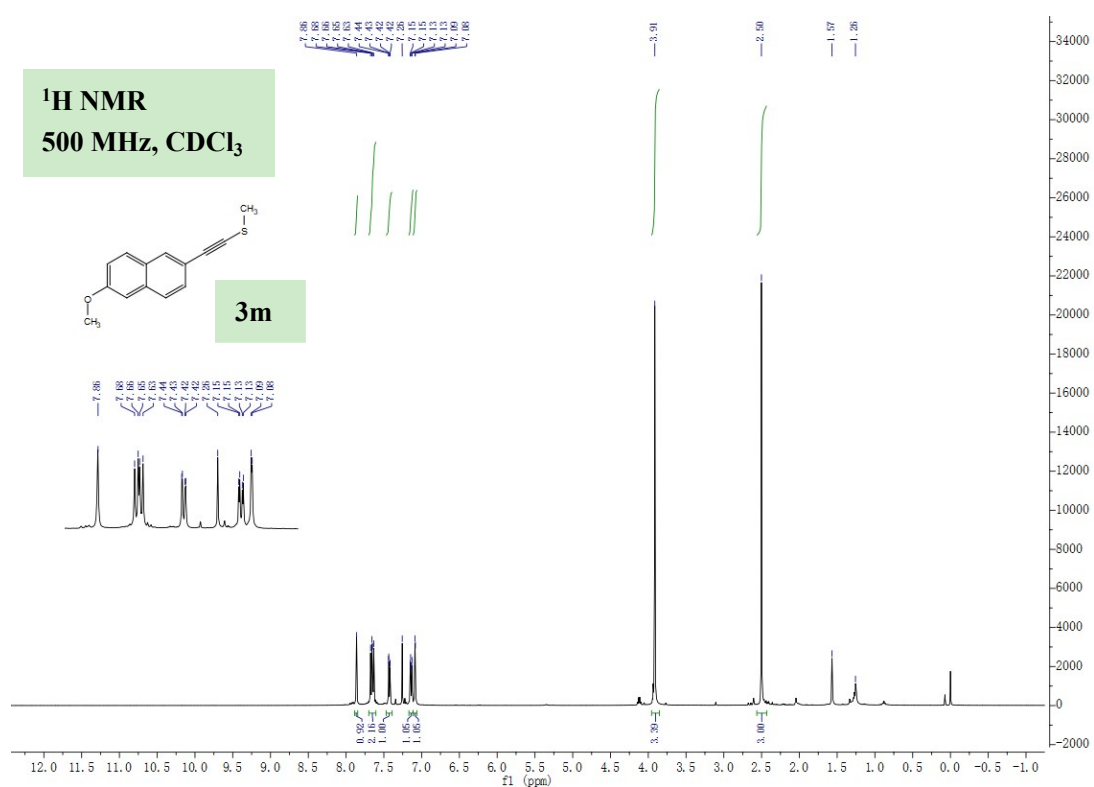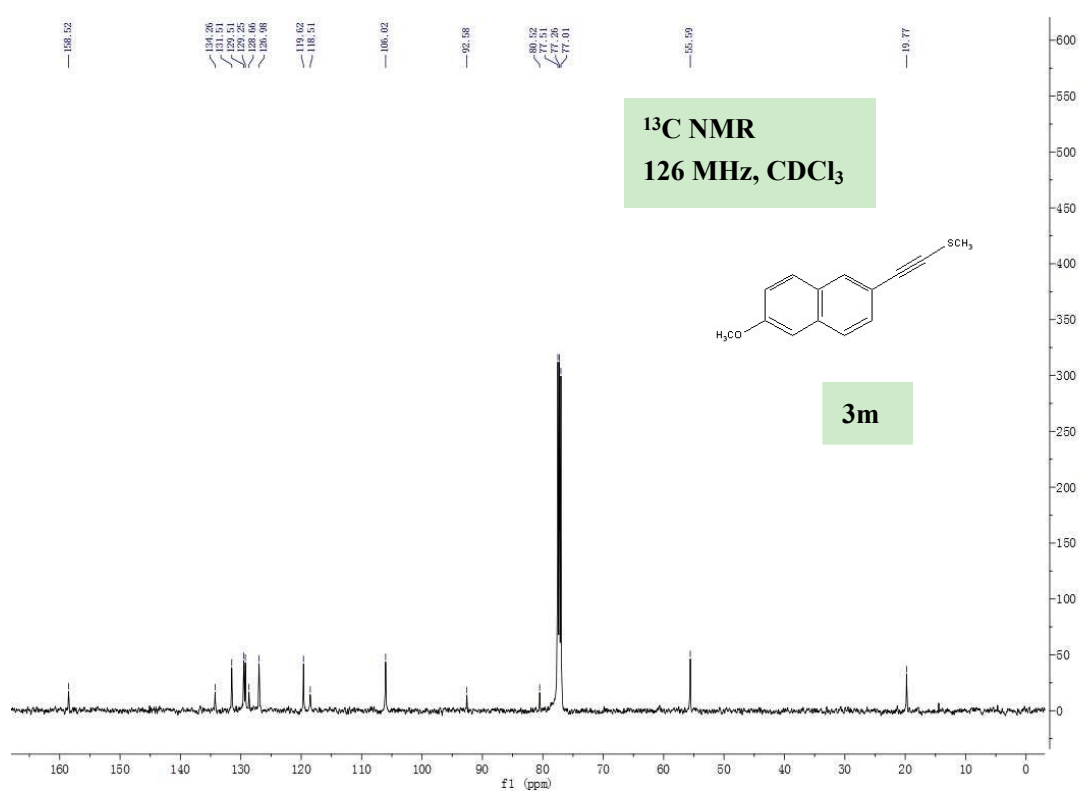

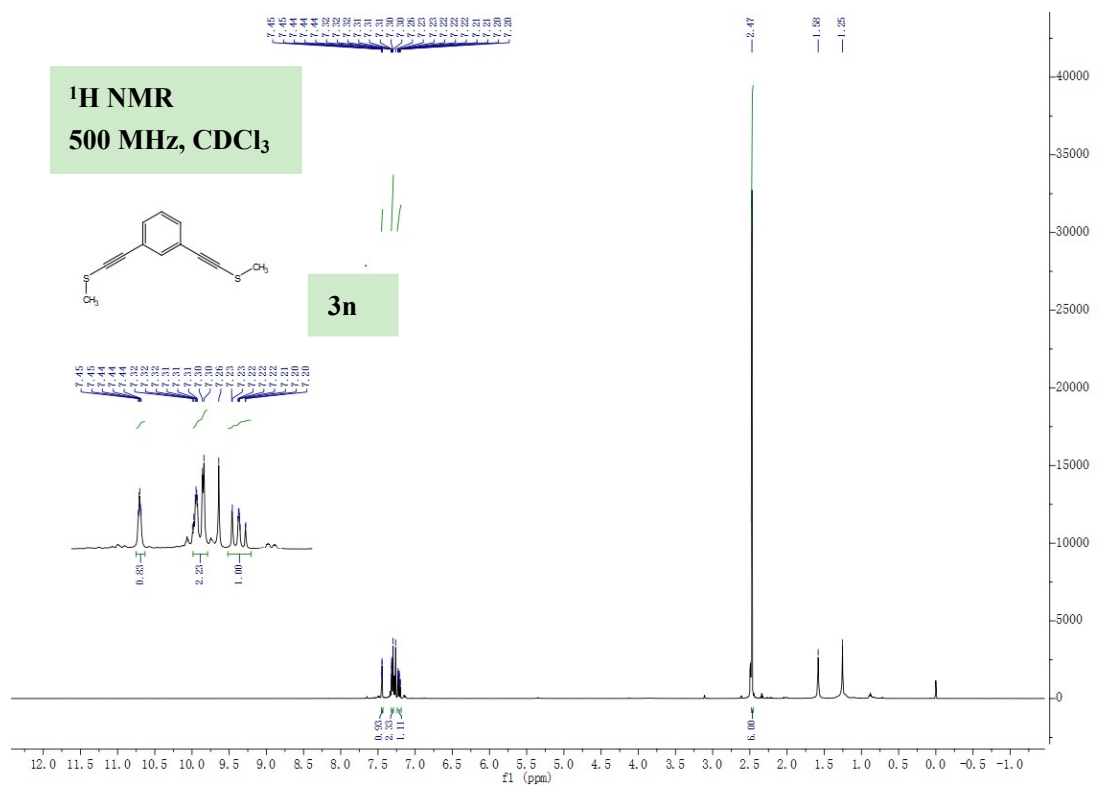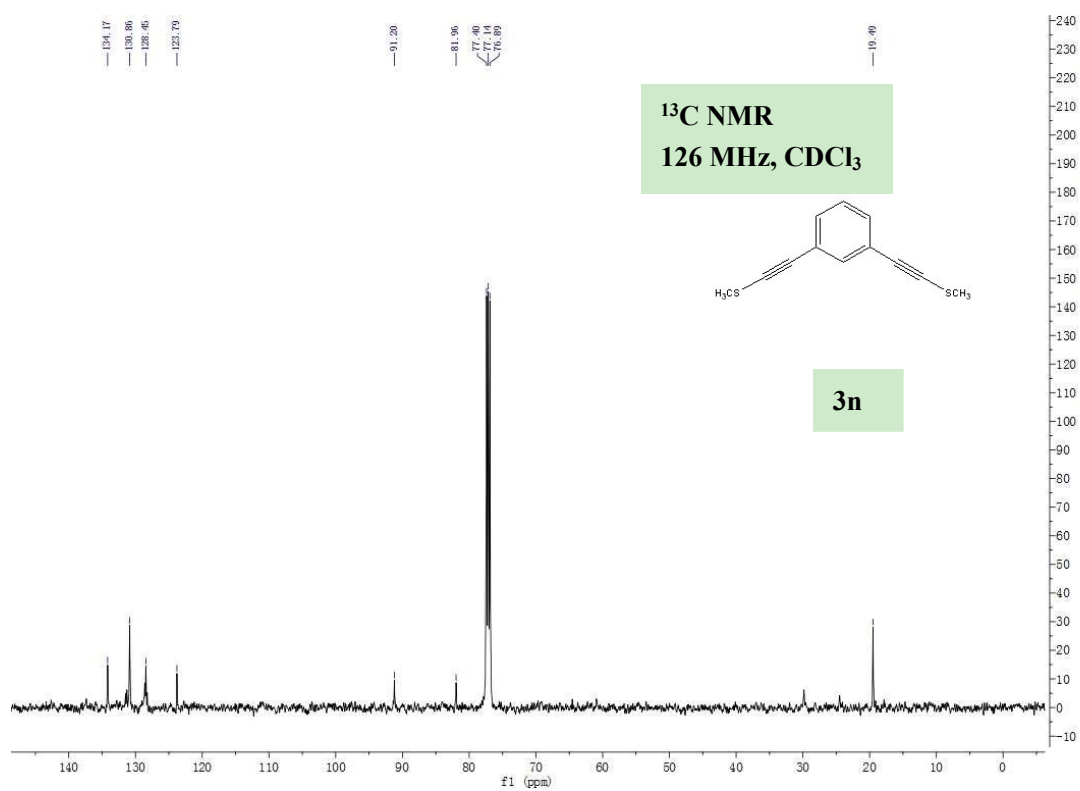

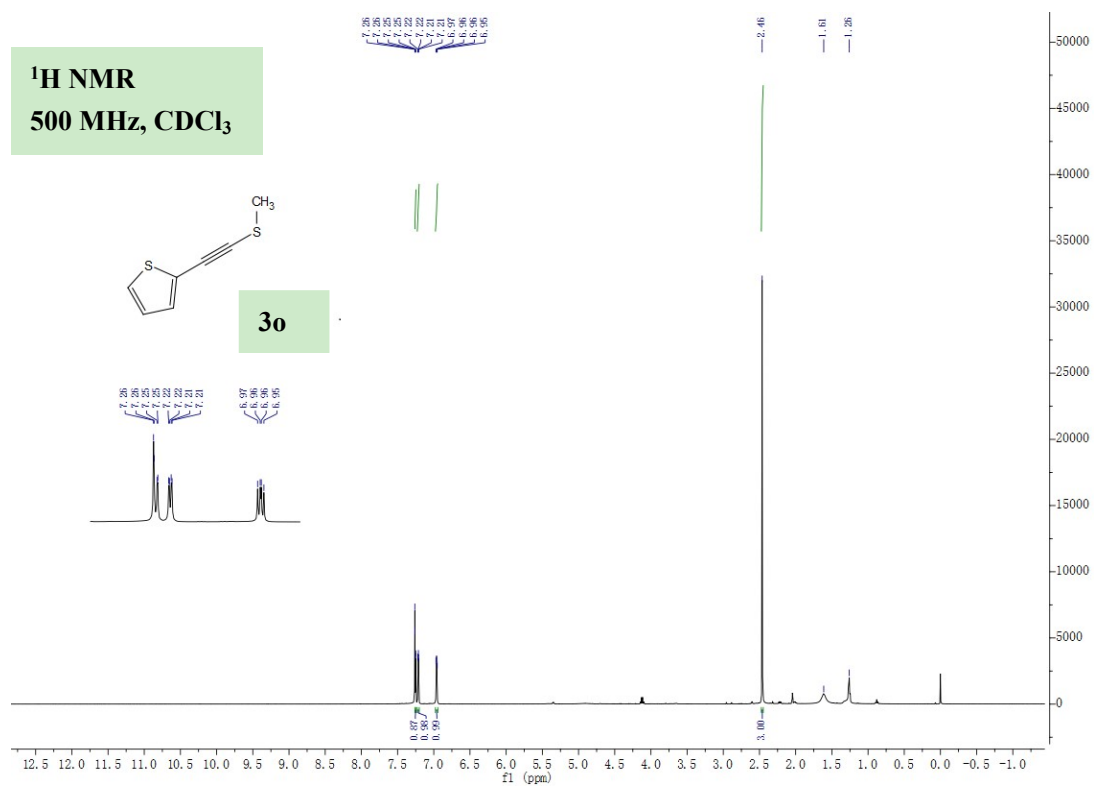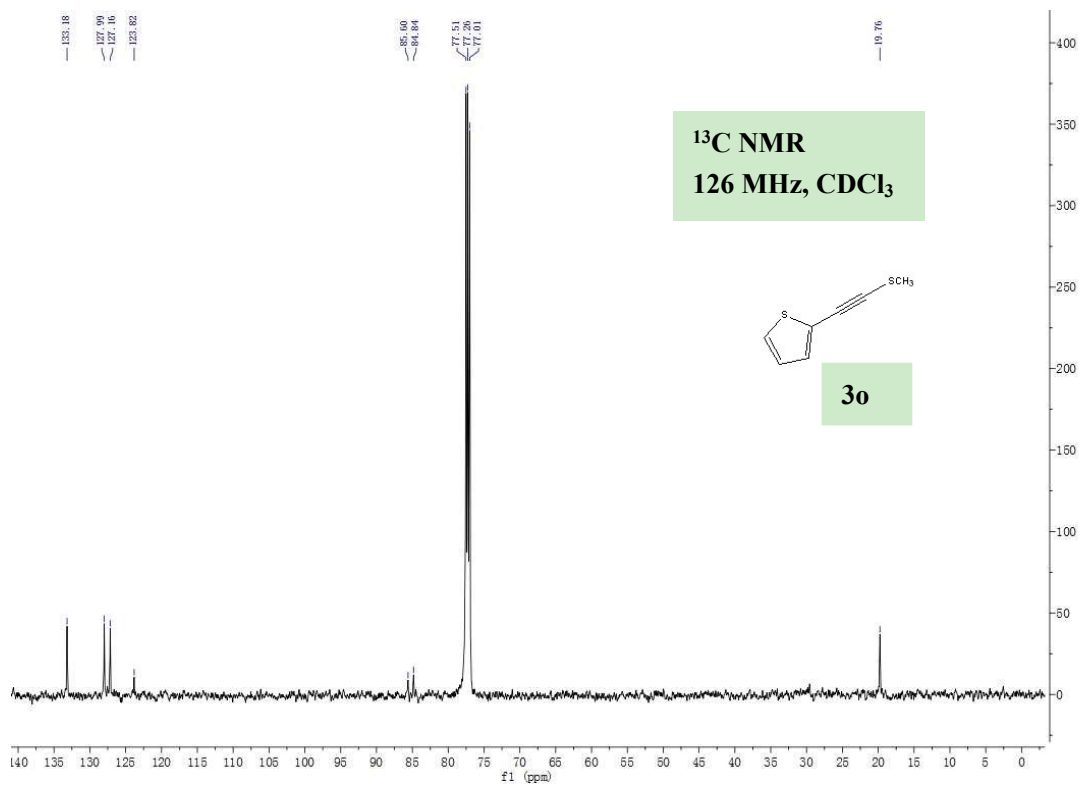



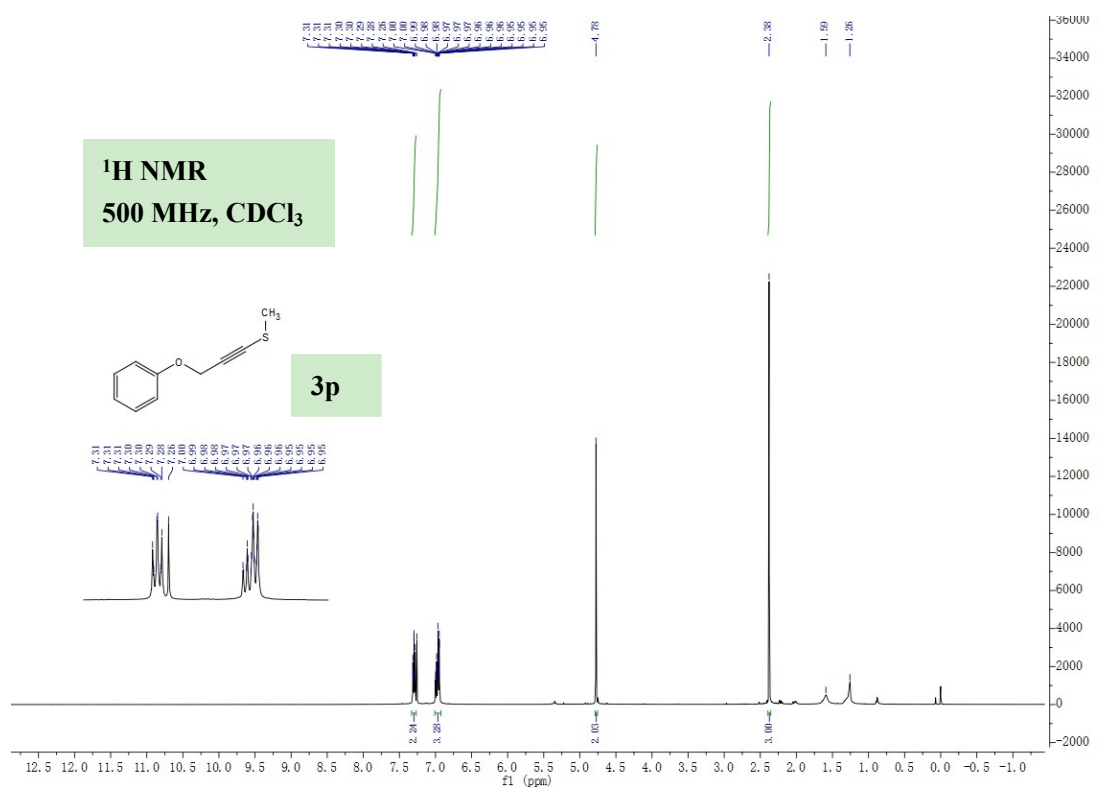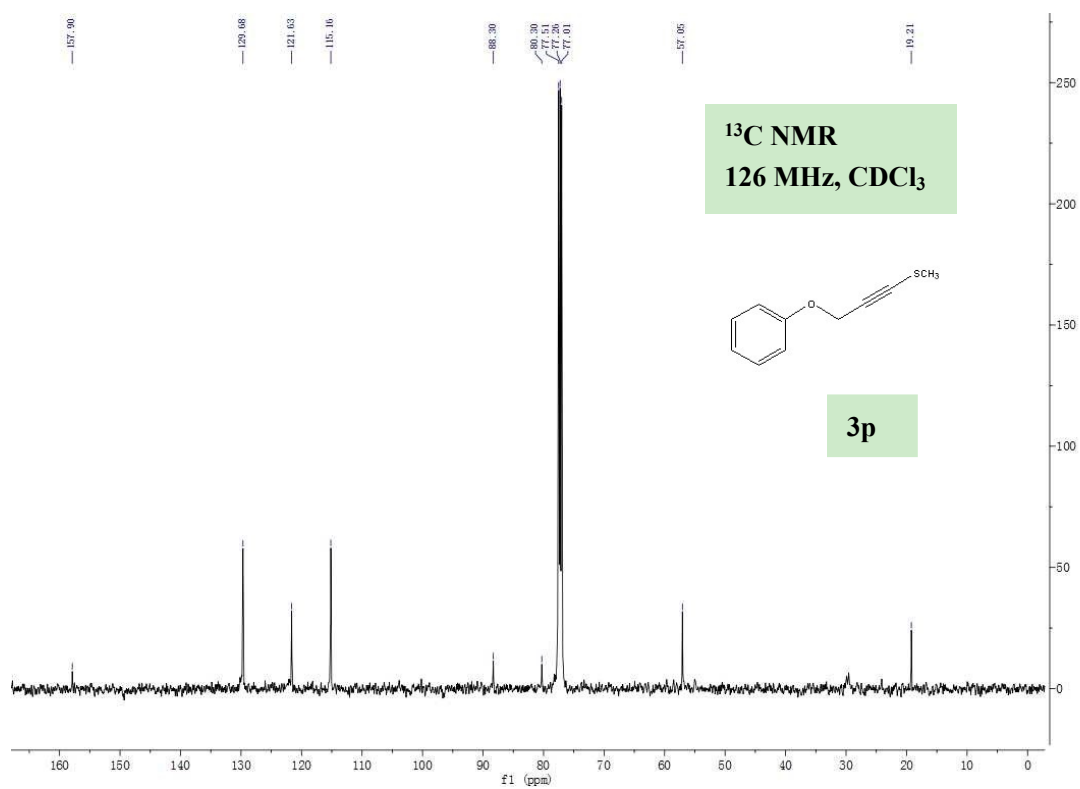



**<sup>19</sup>F NMR**  
**470 MHz, CDCl<sub>3</sub>**

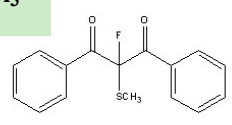

**5a**

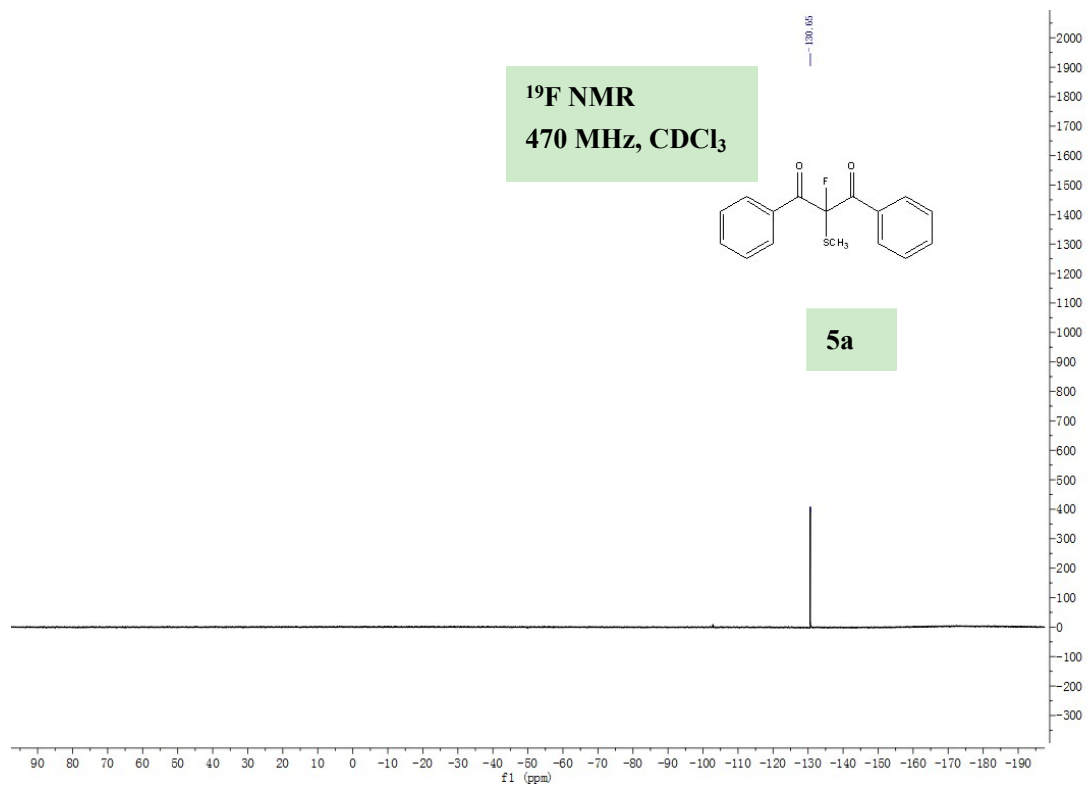



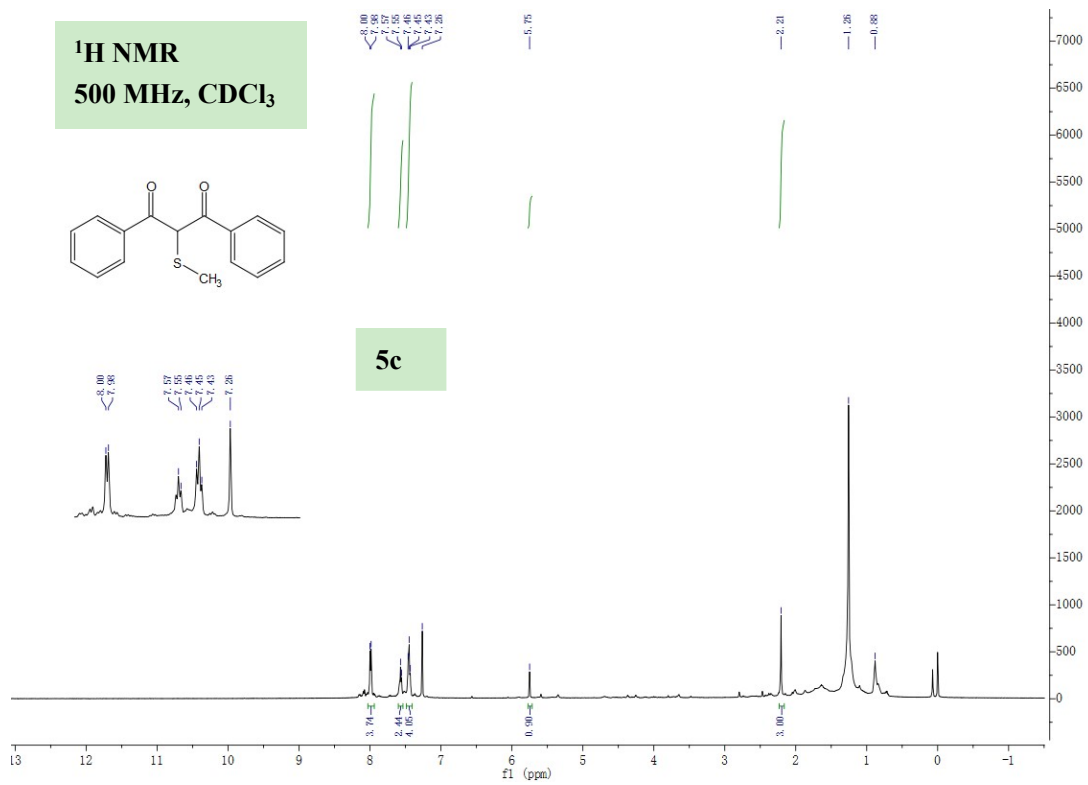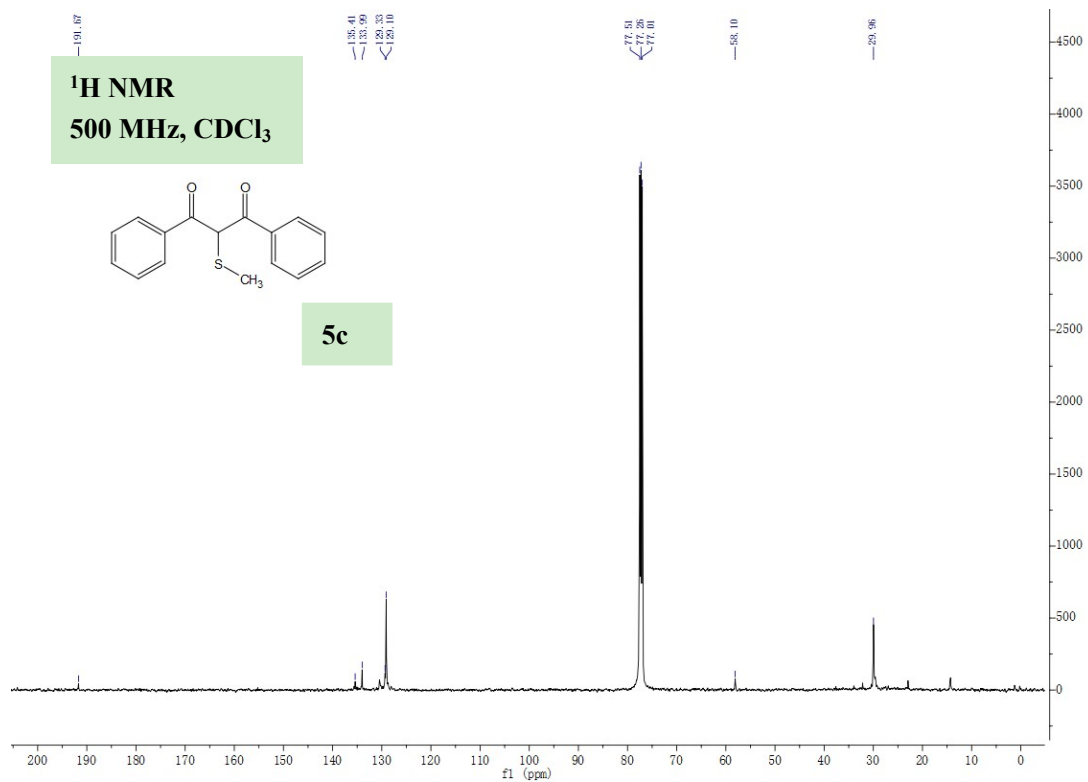

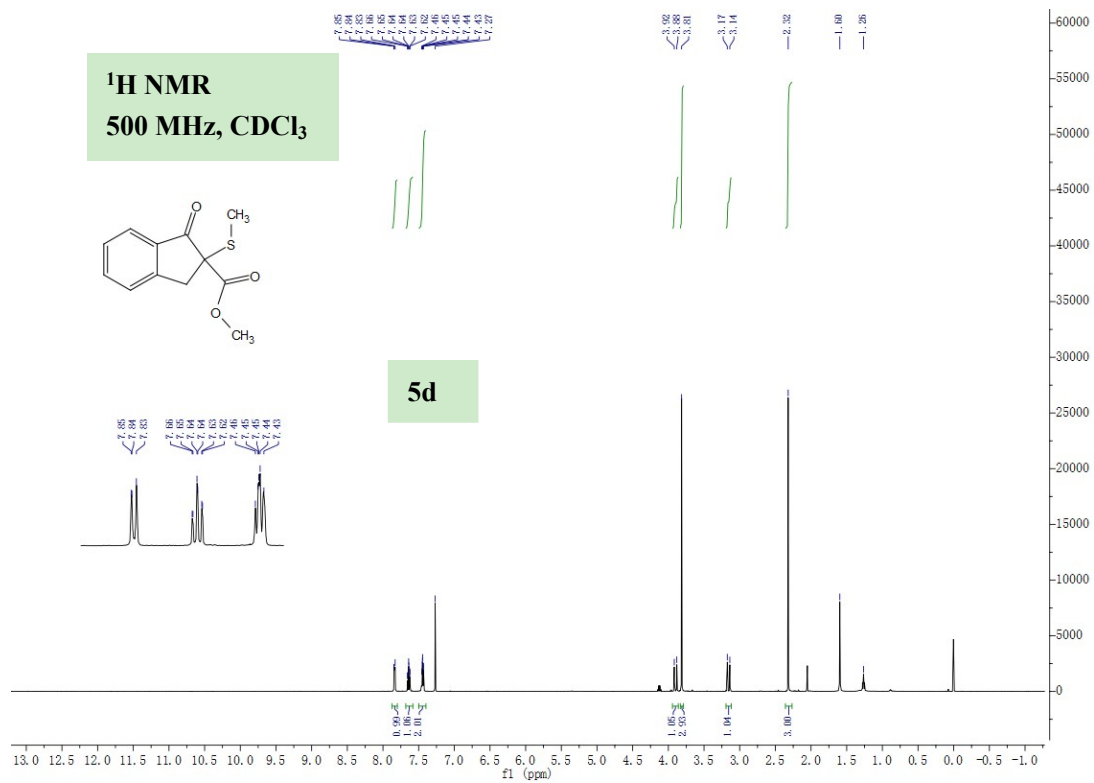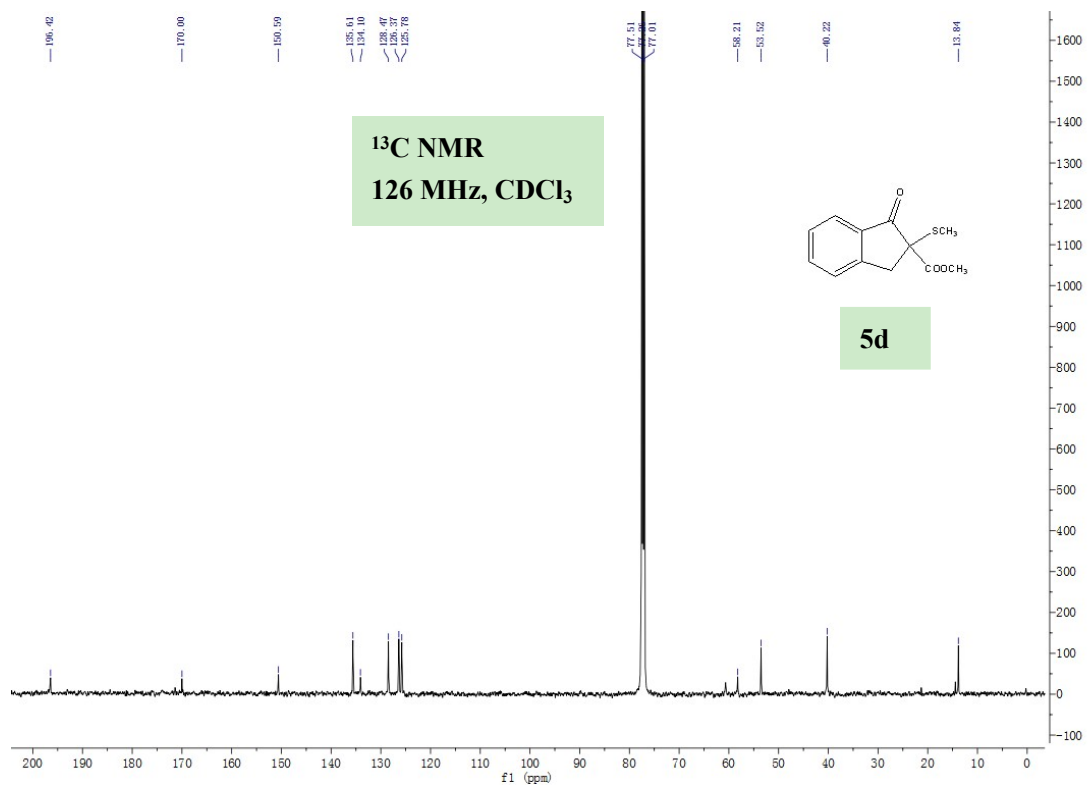

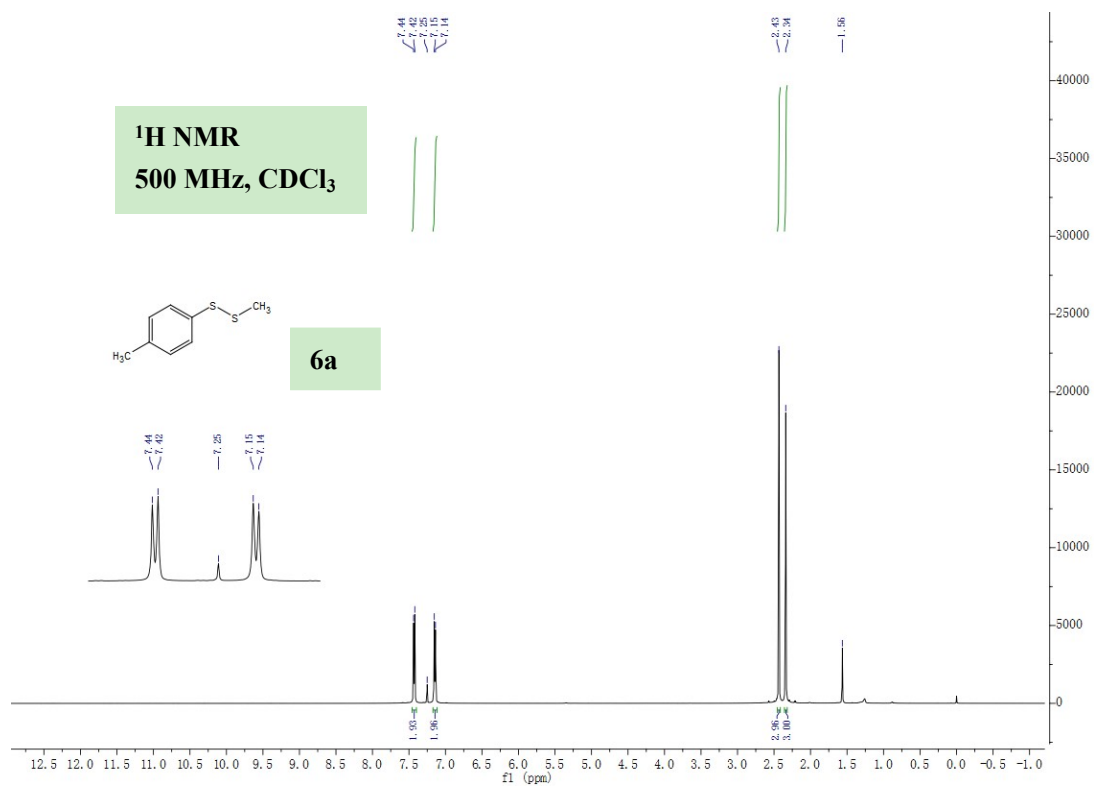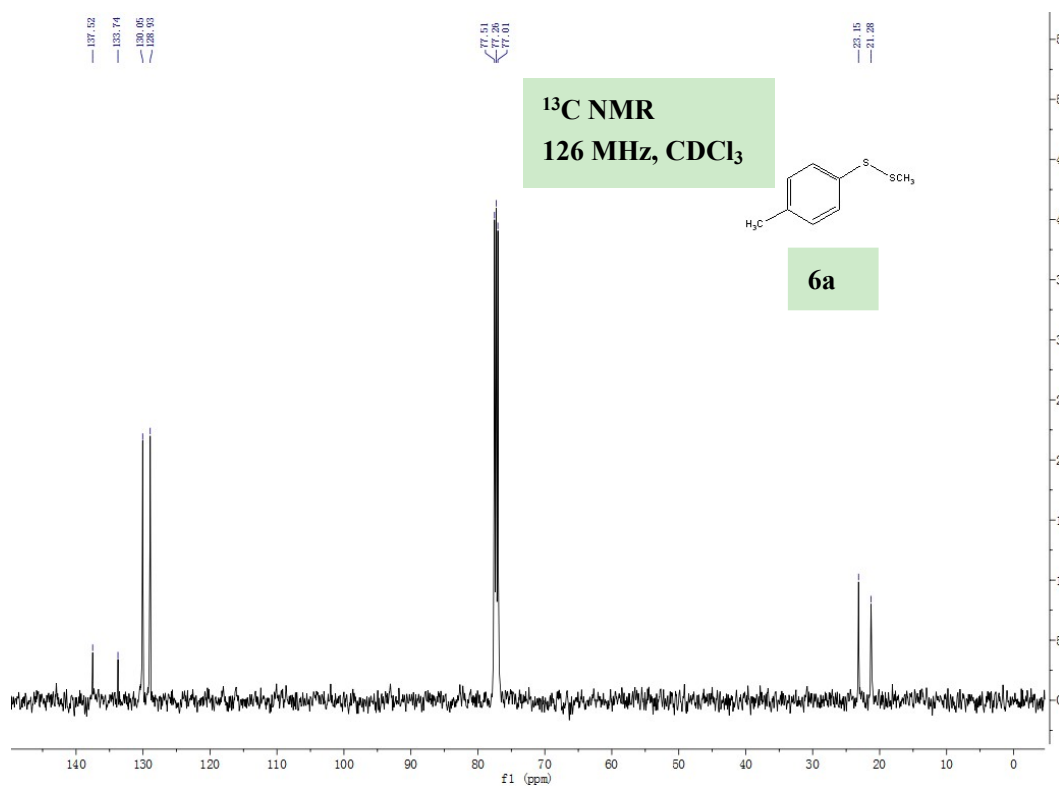

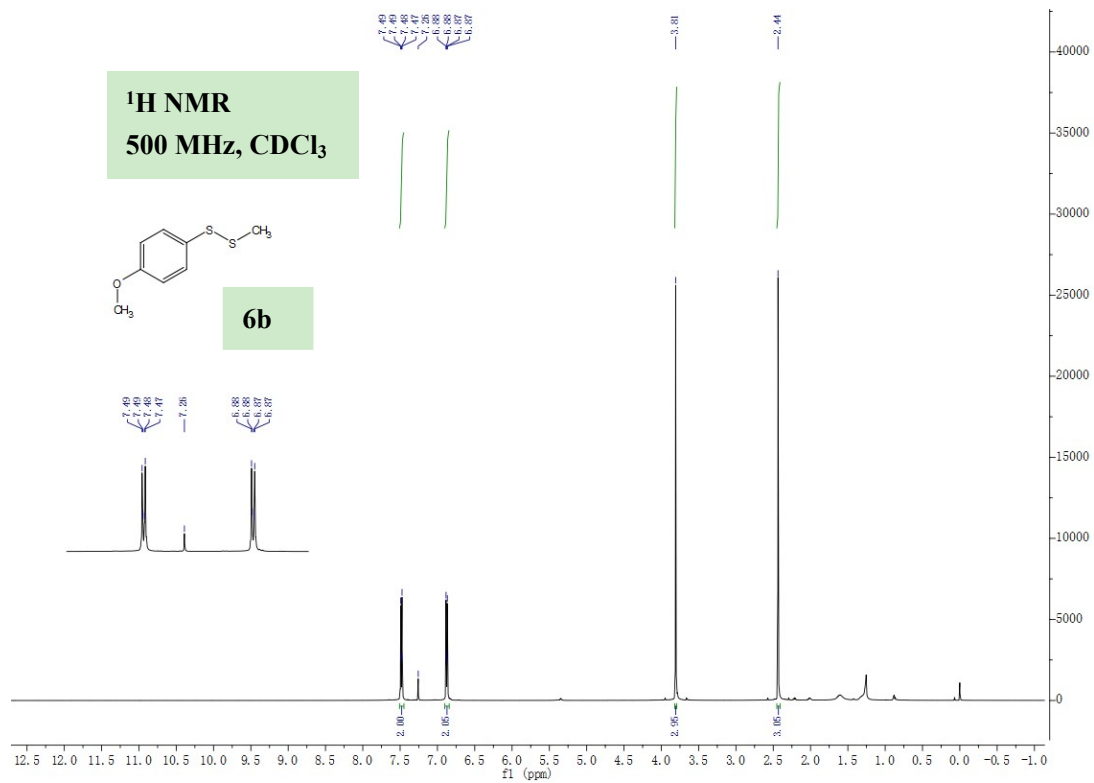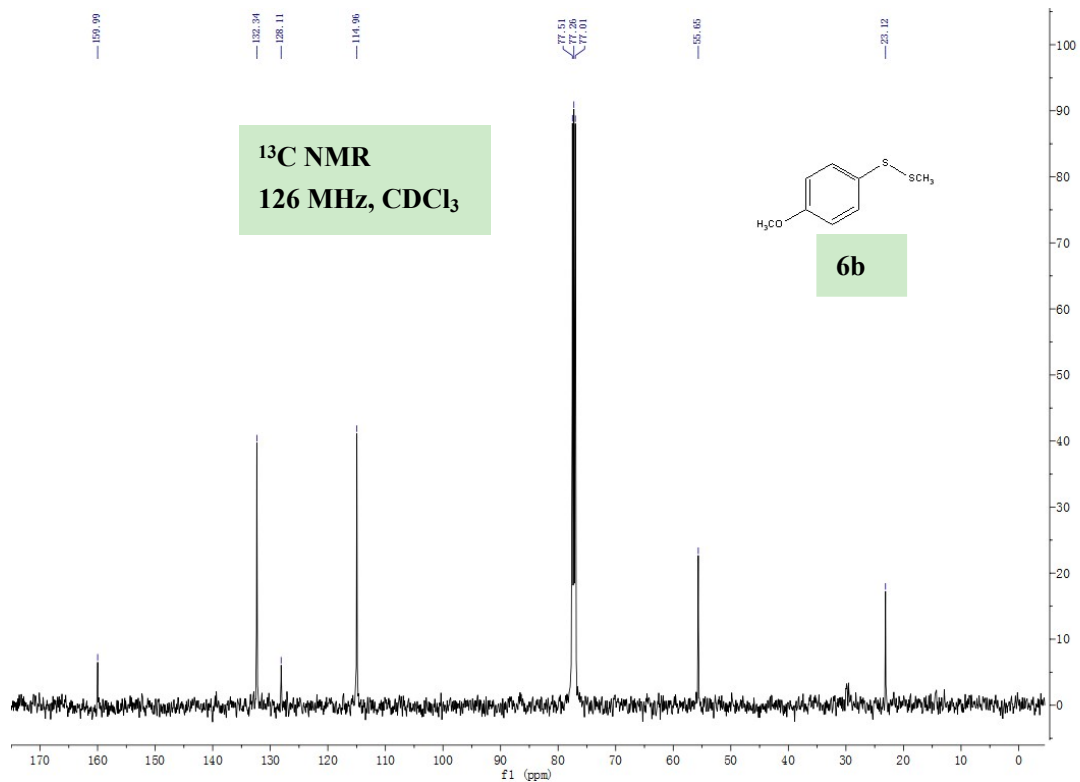



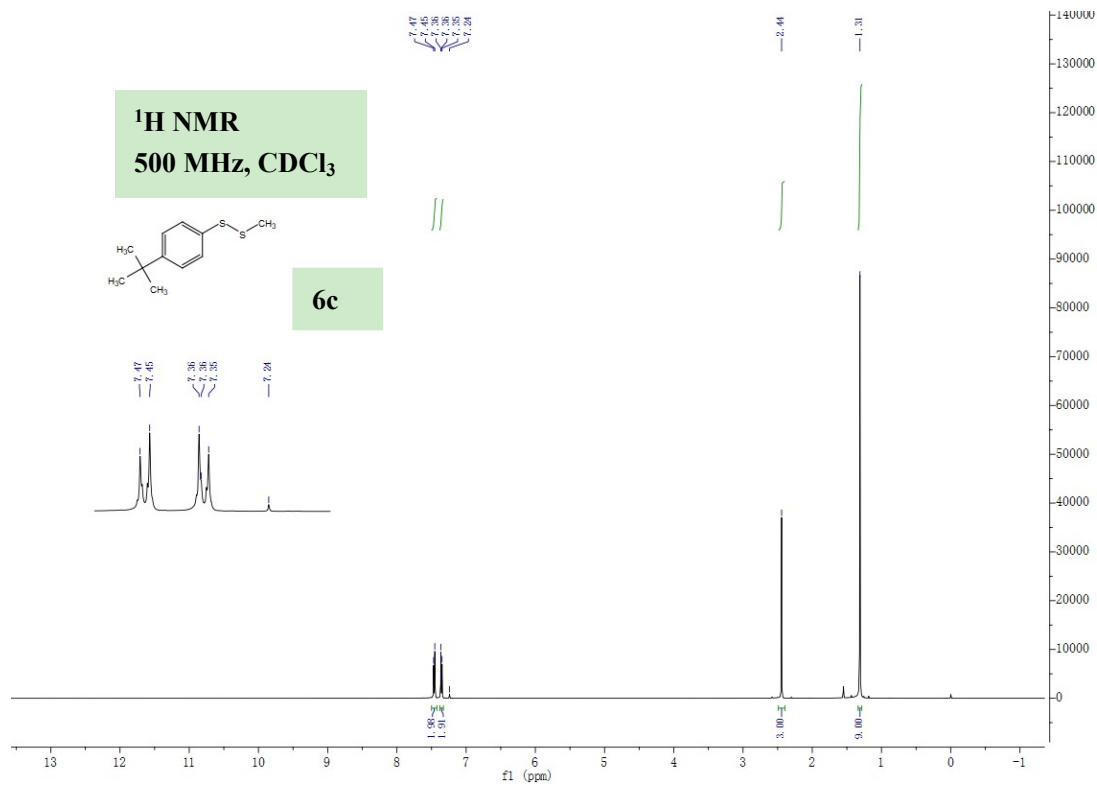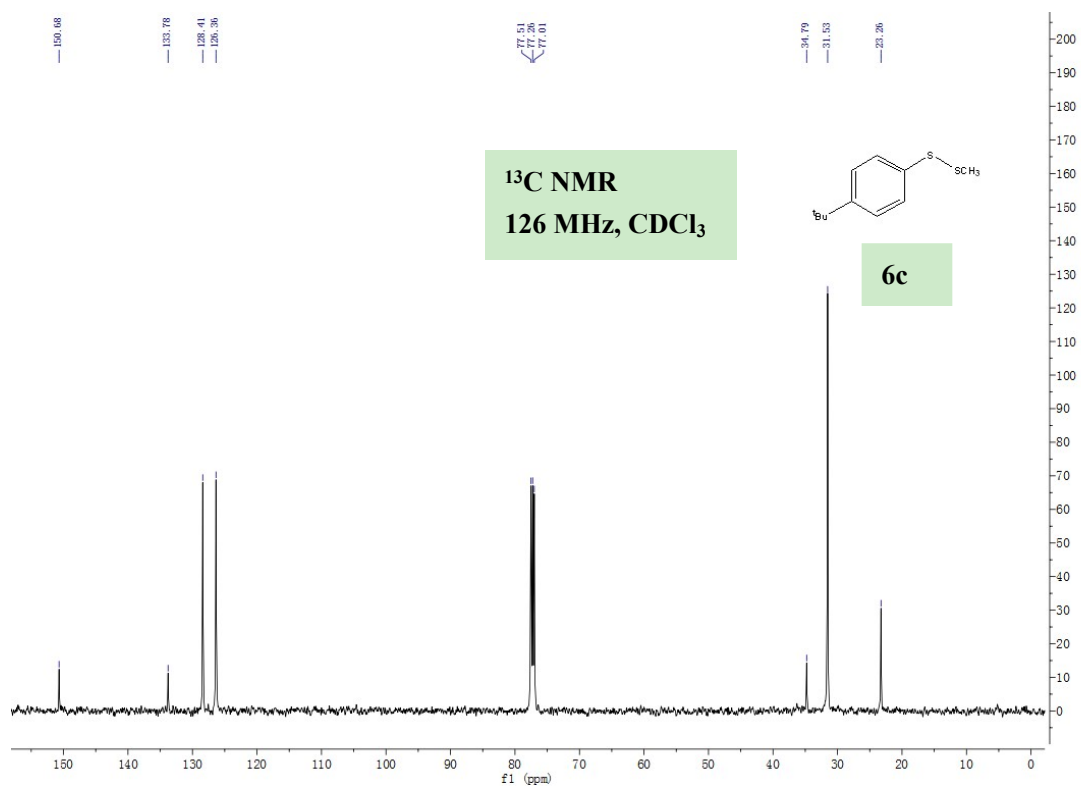

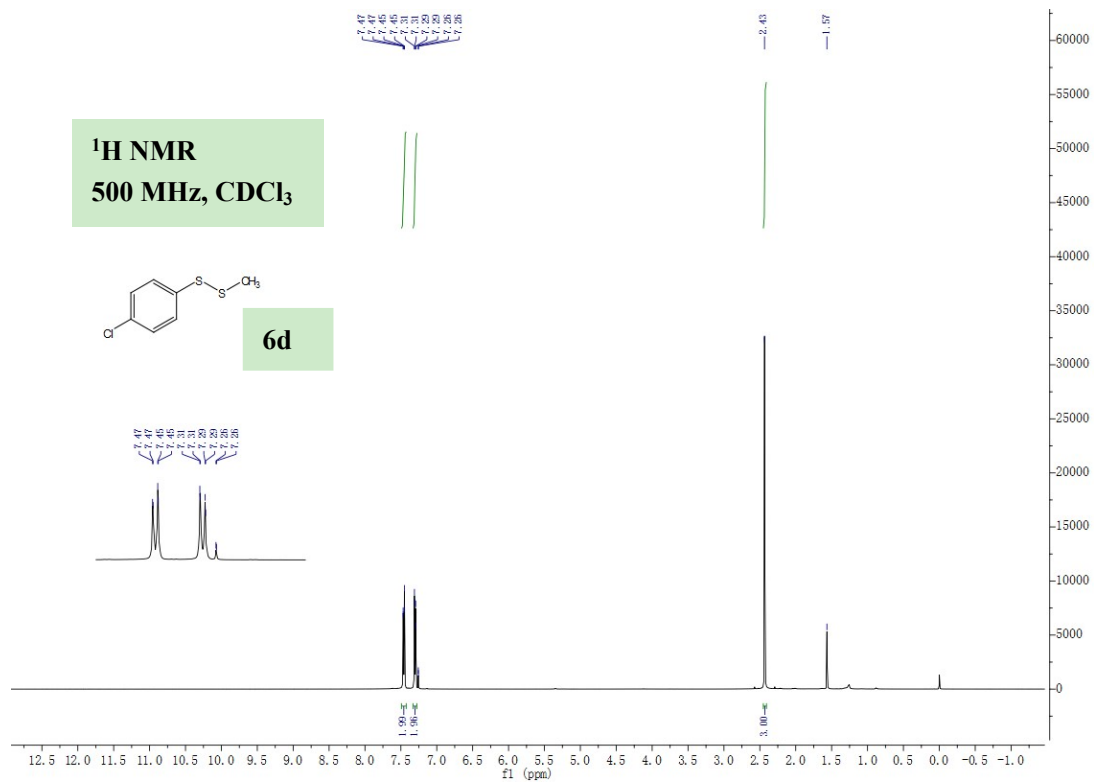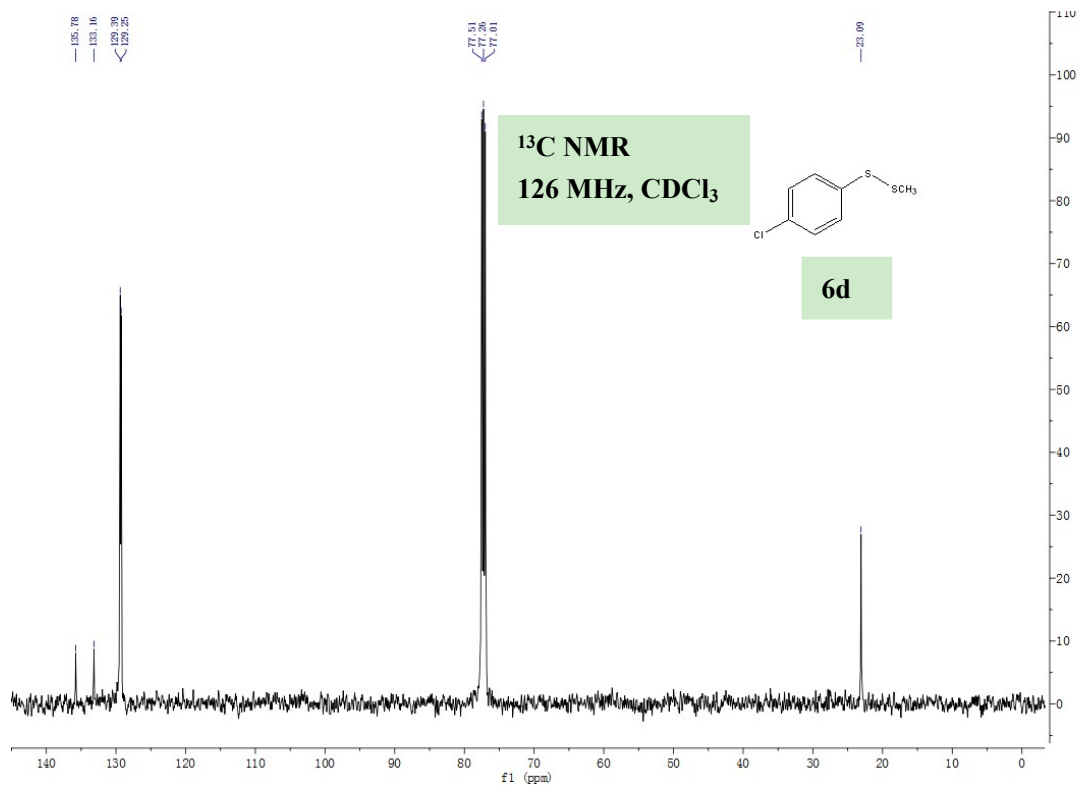

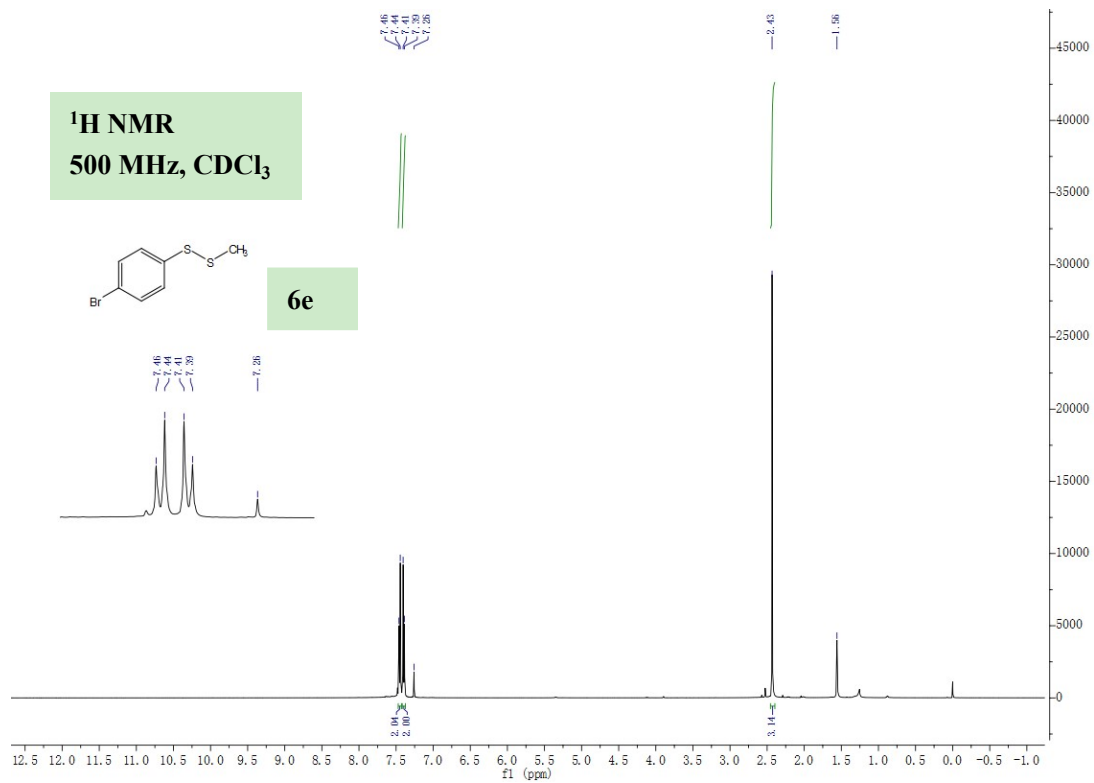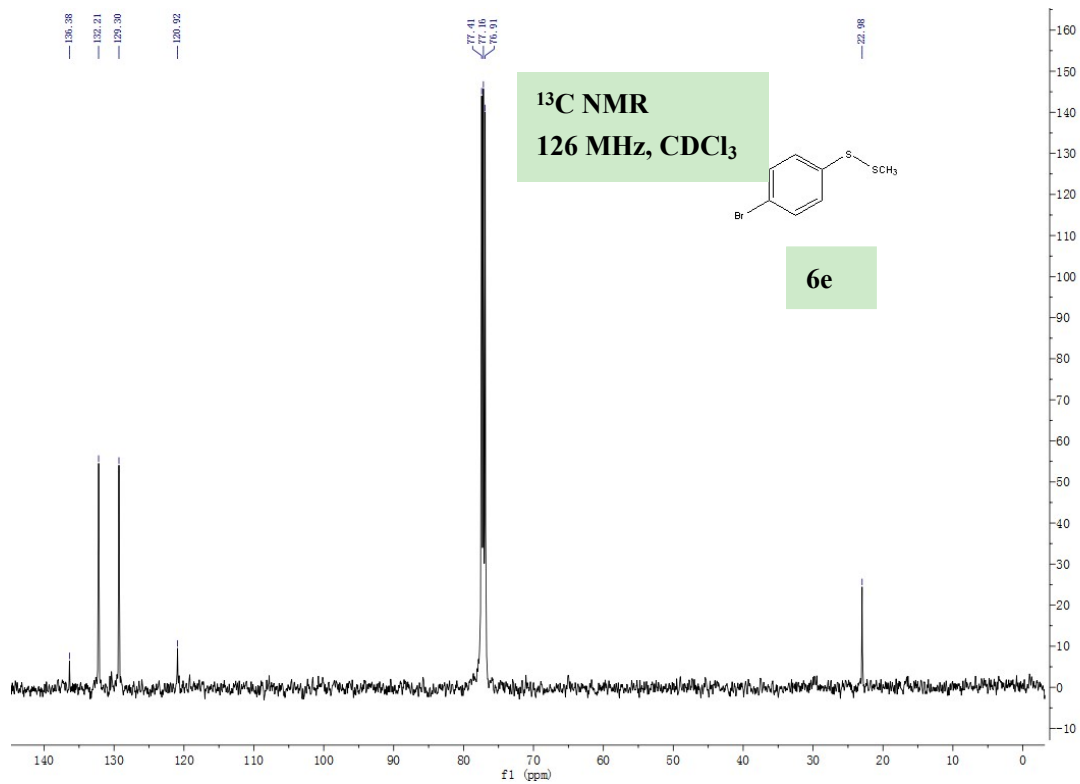

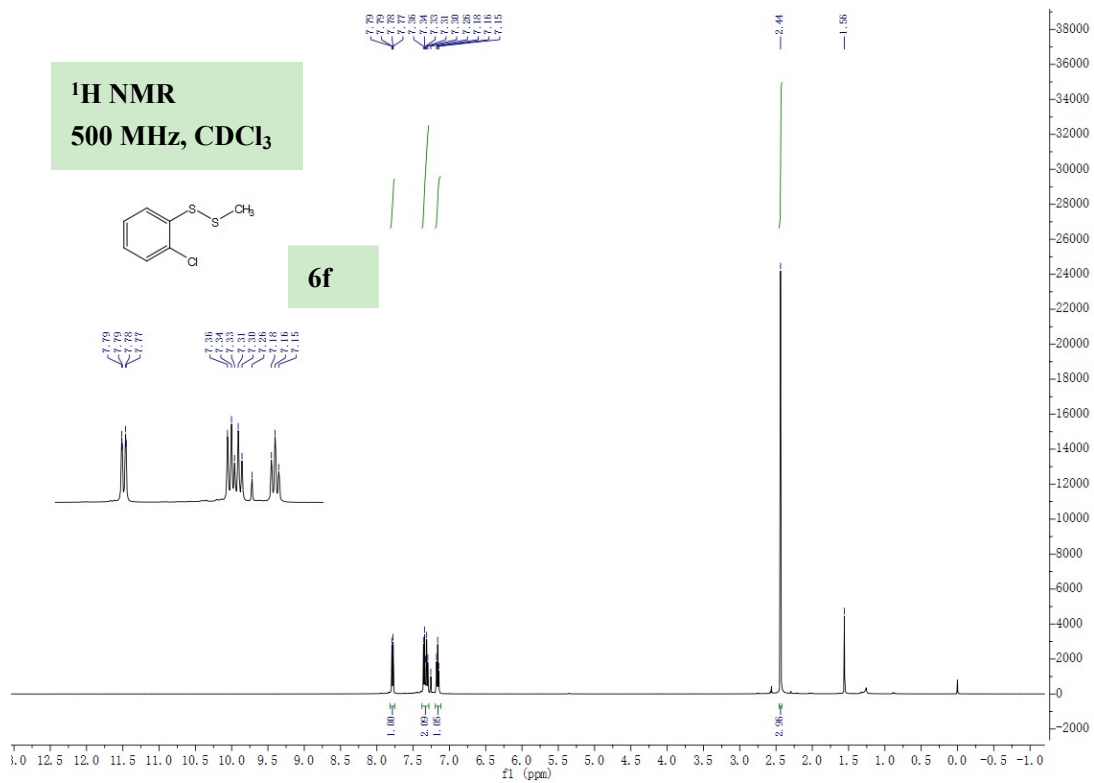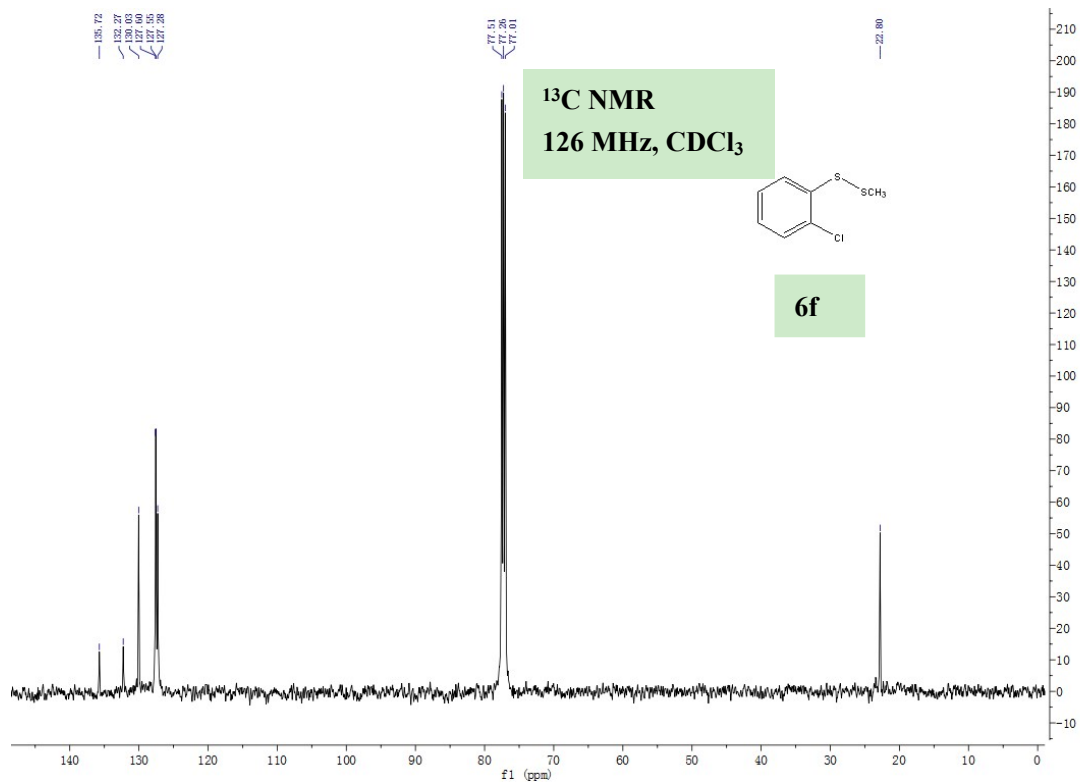

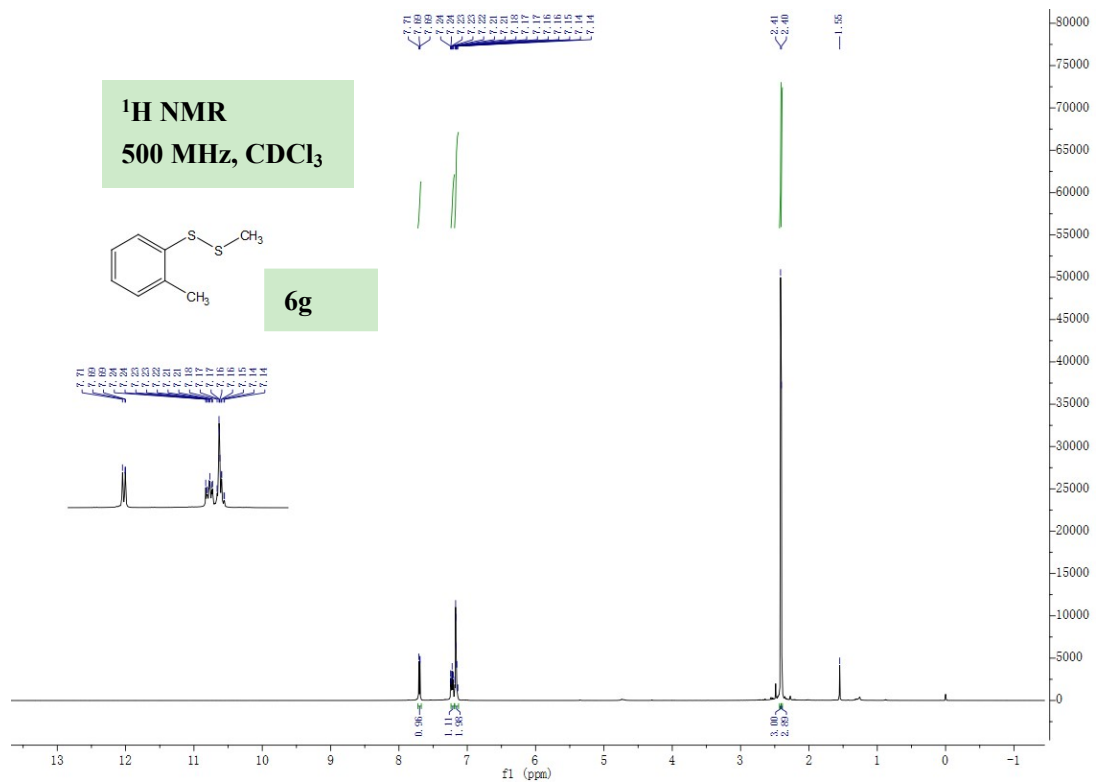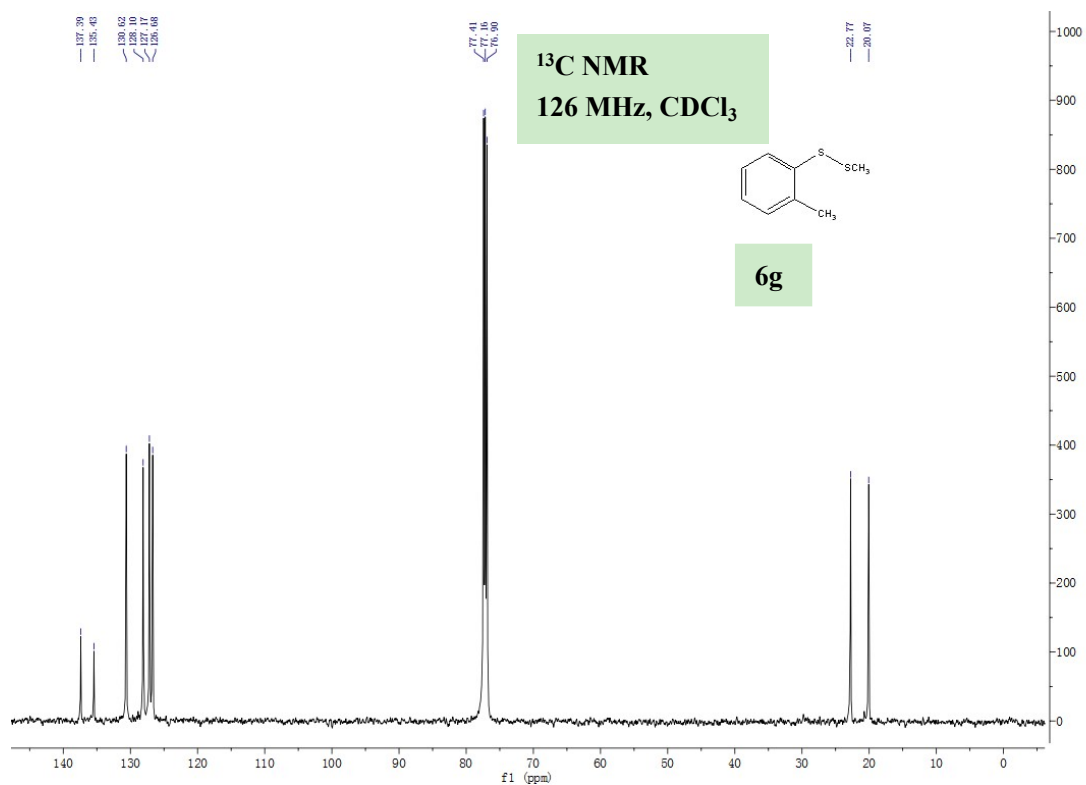

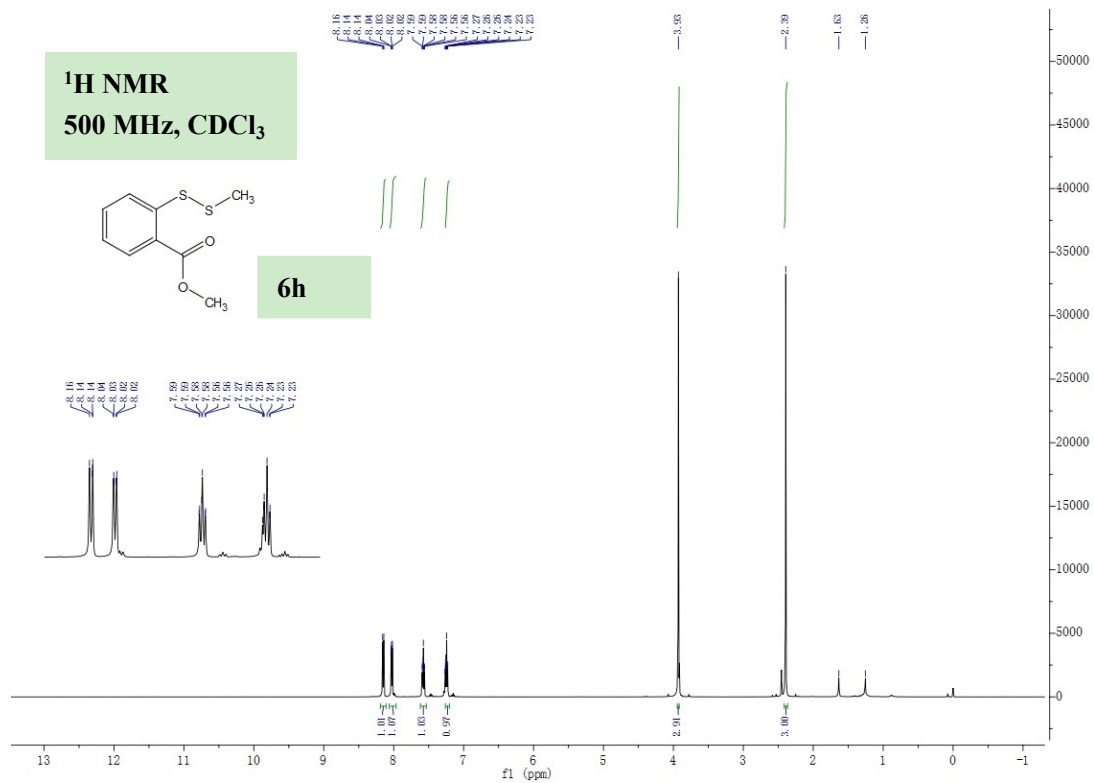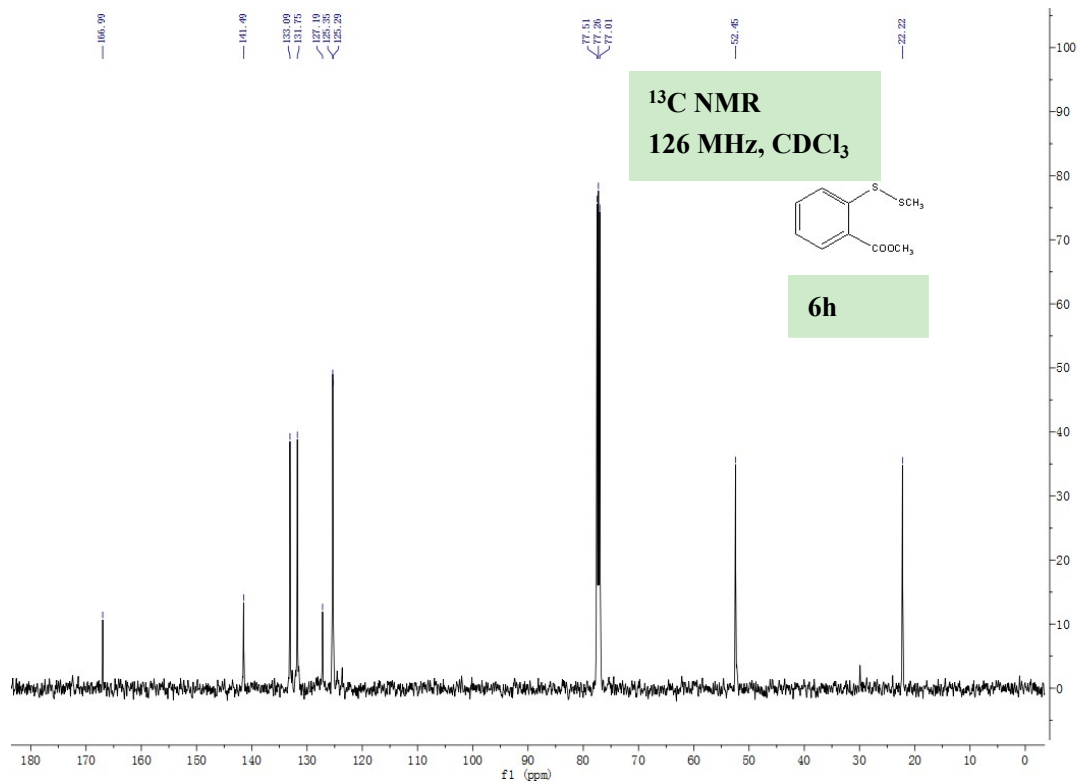

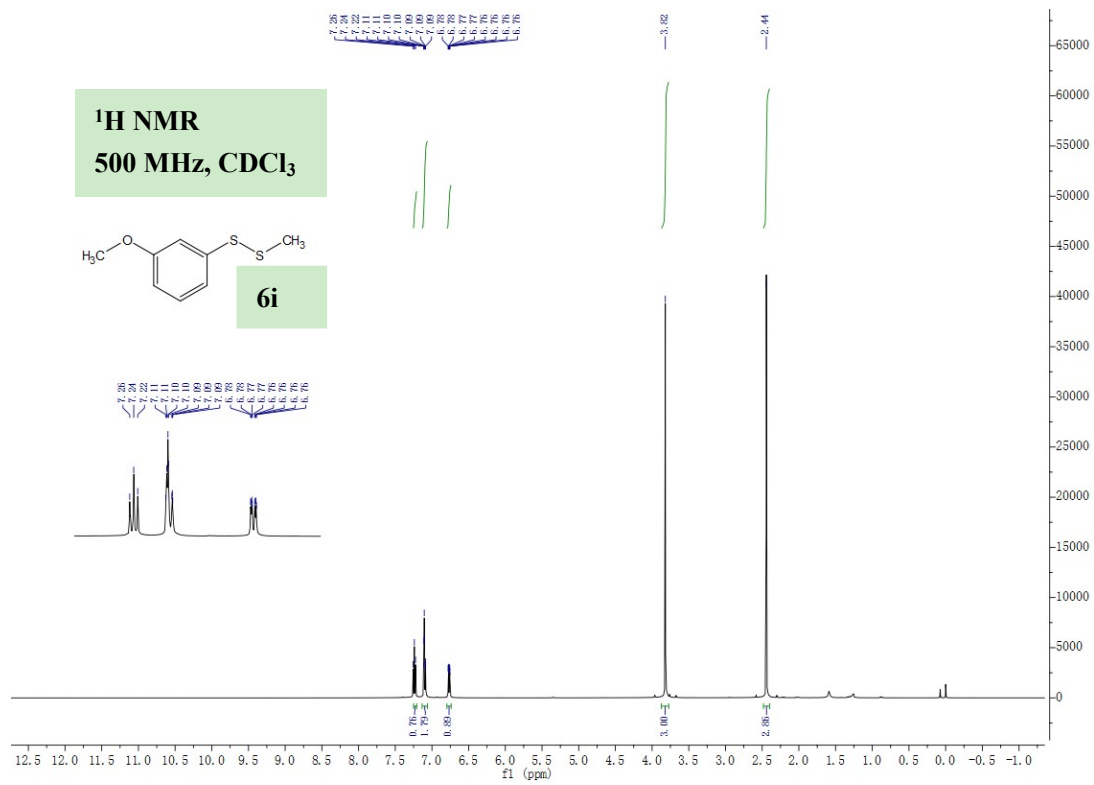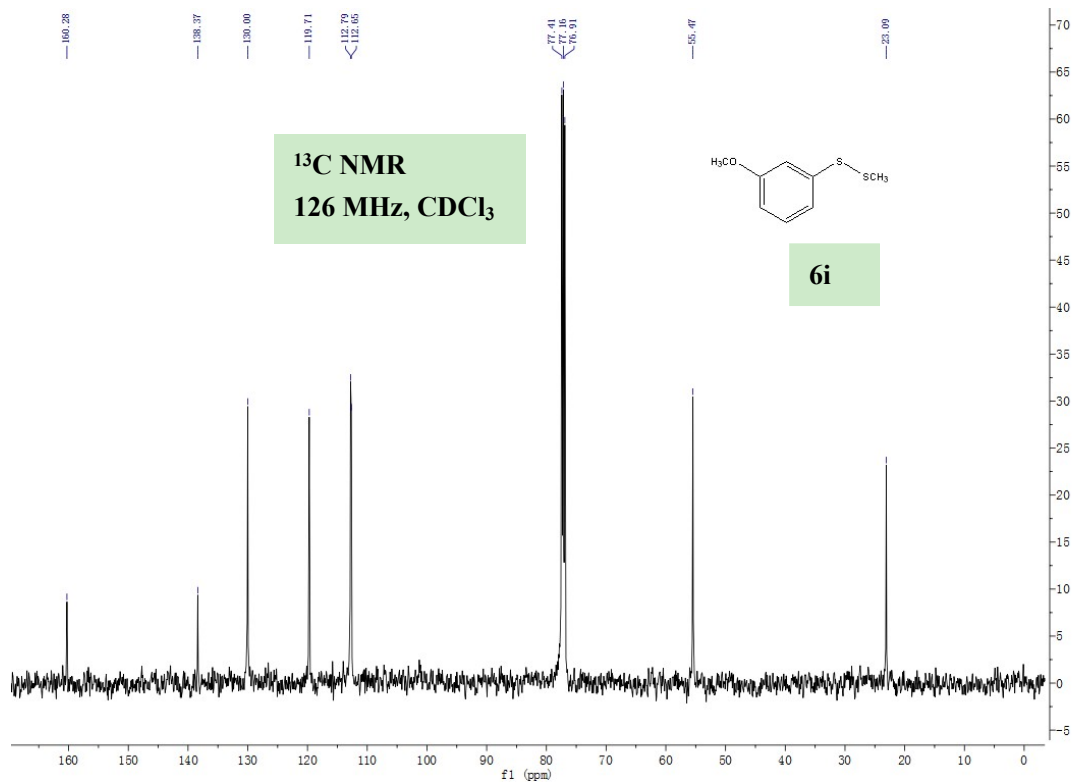

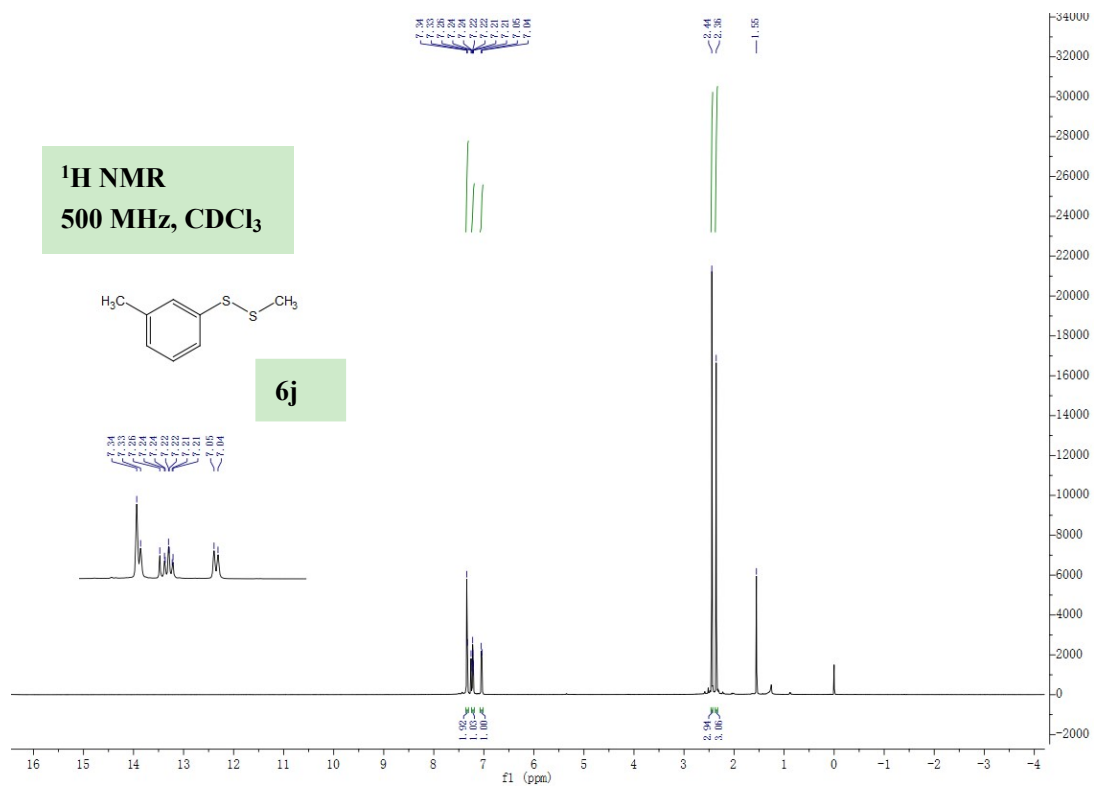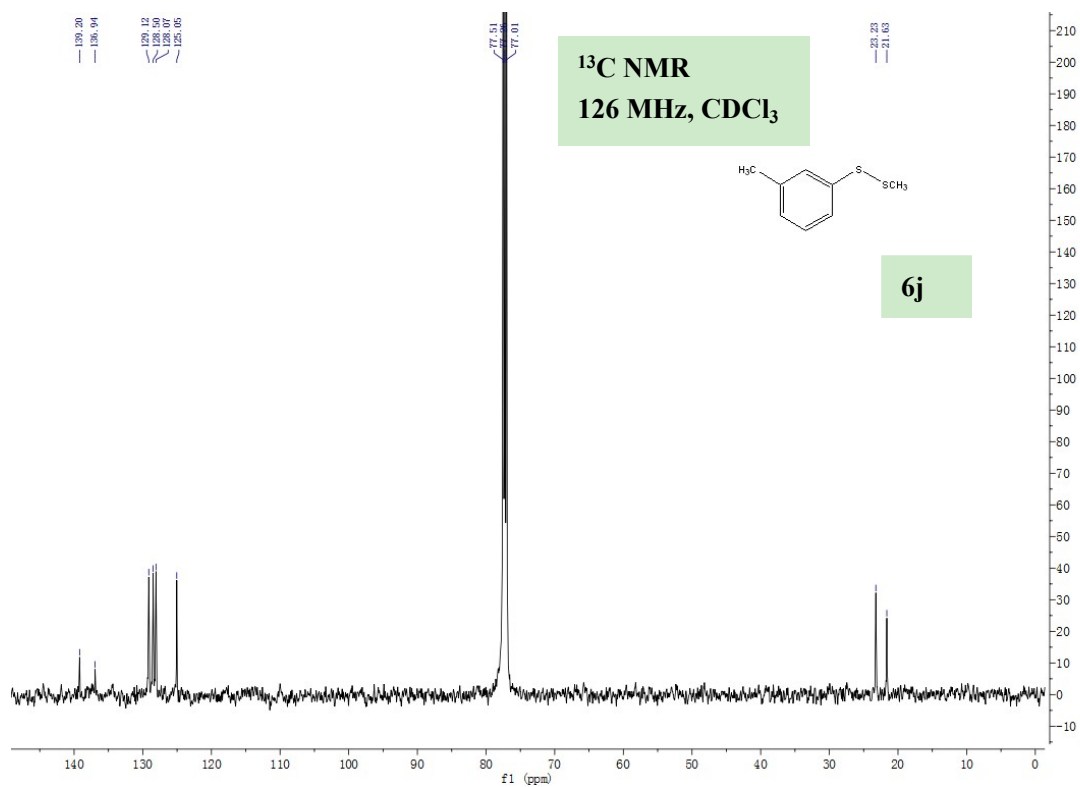



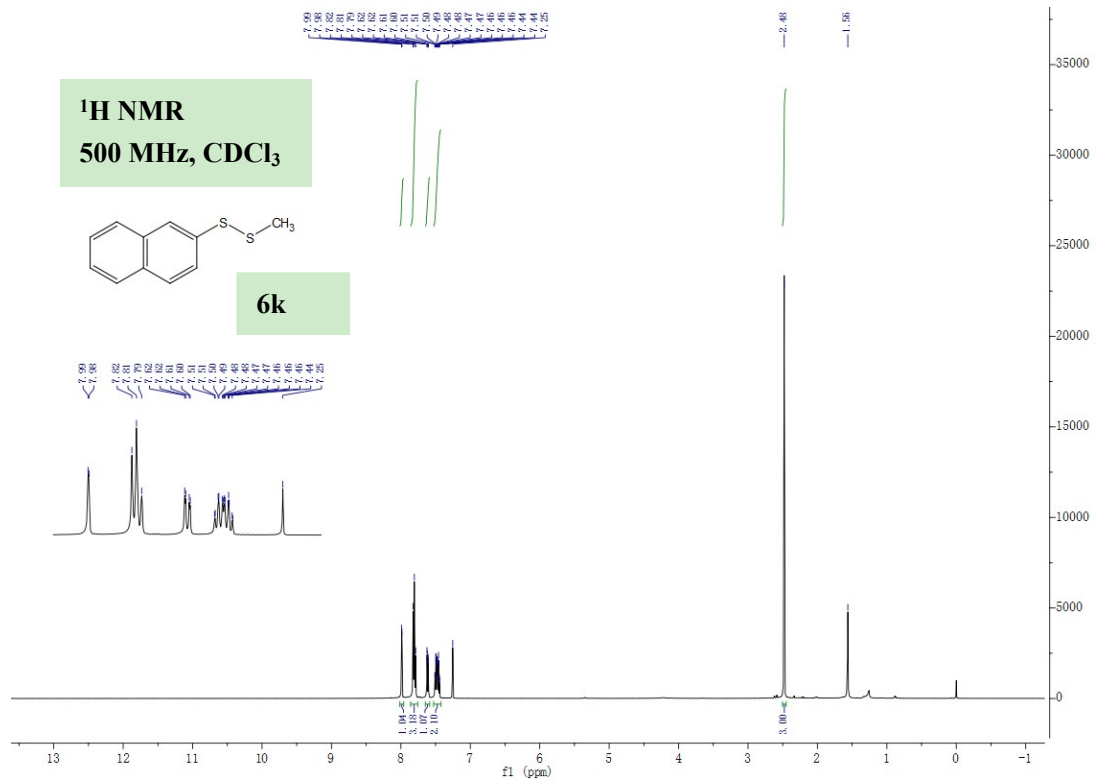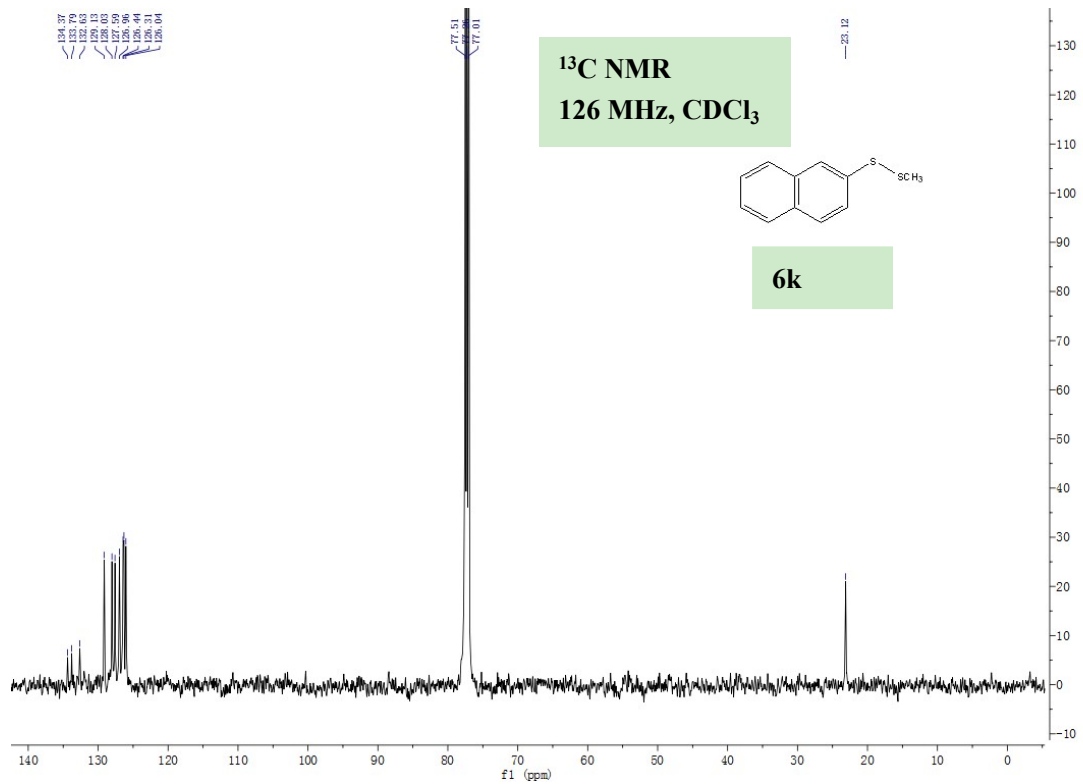

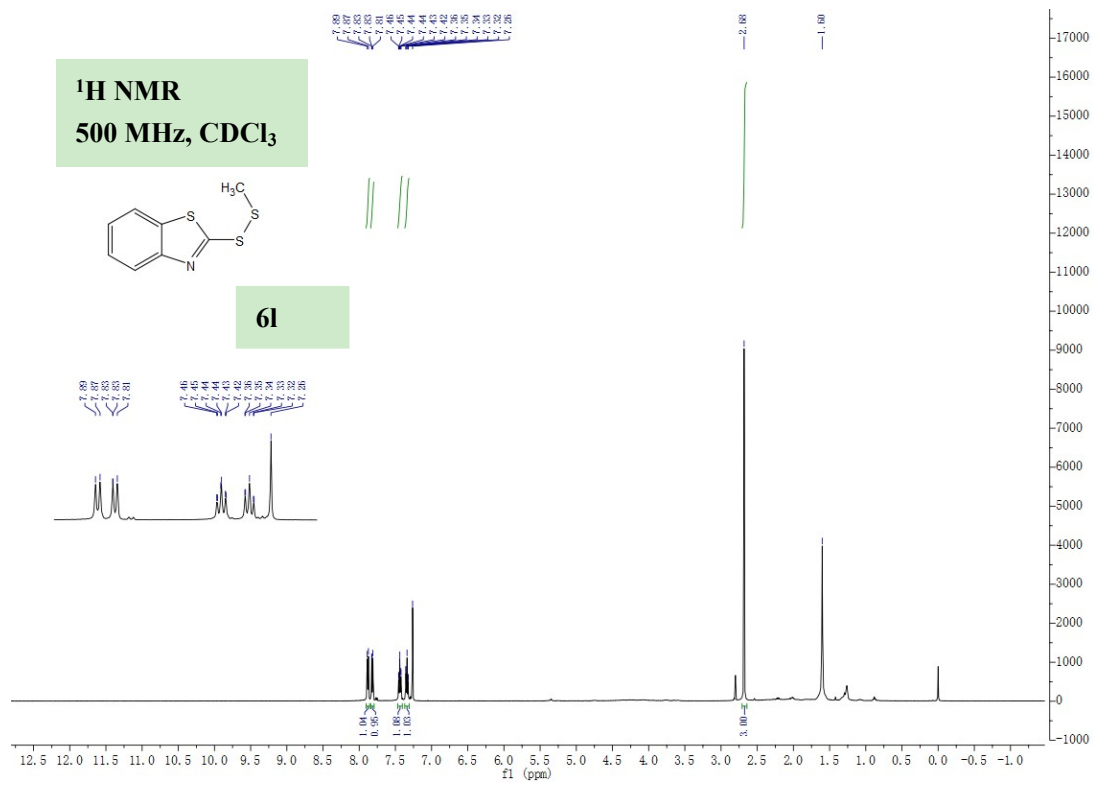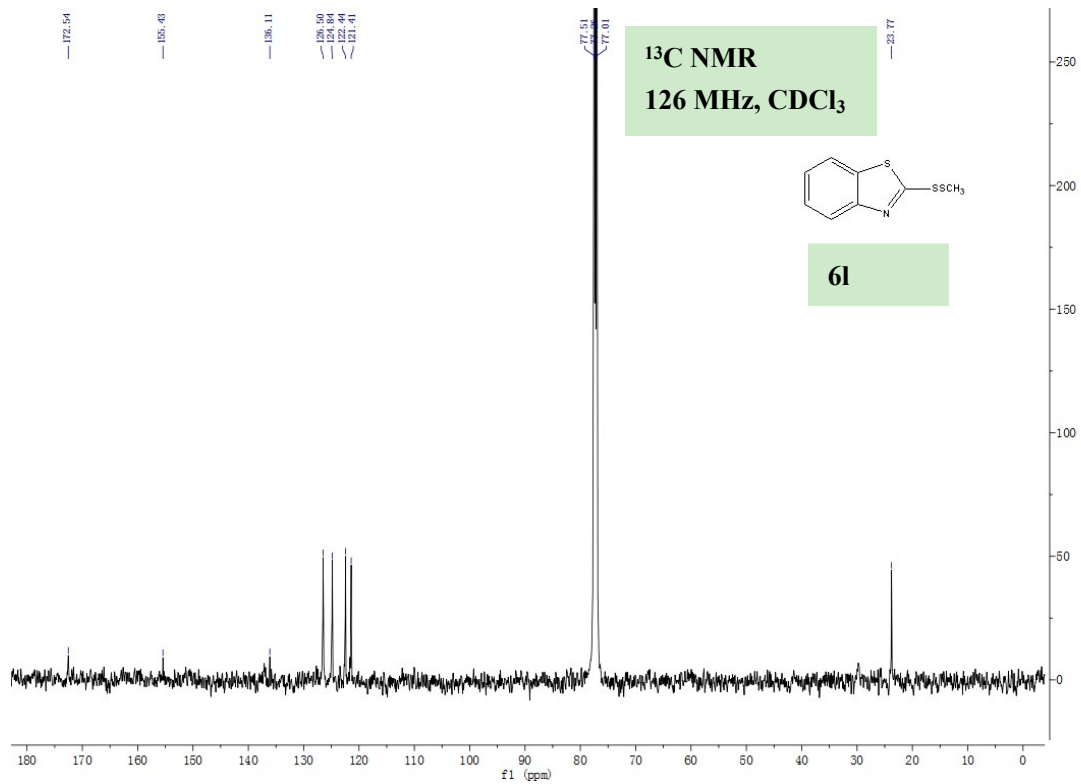

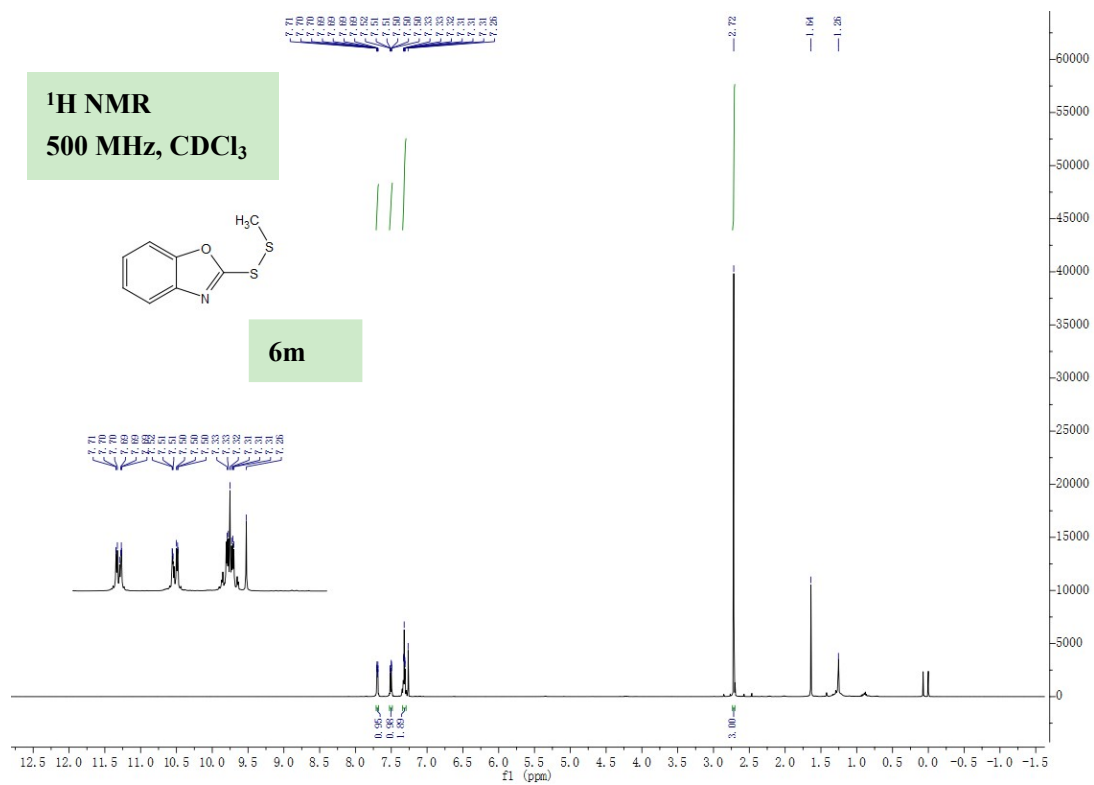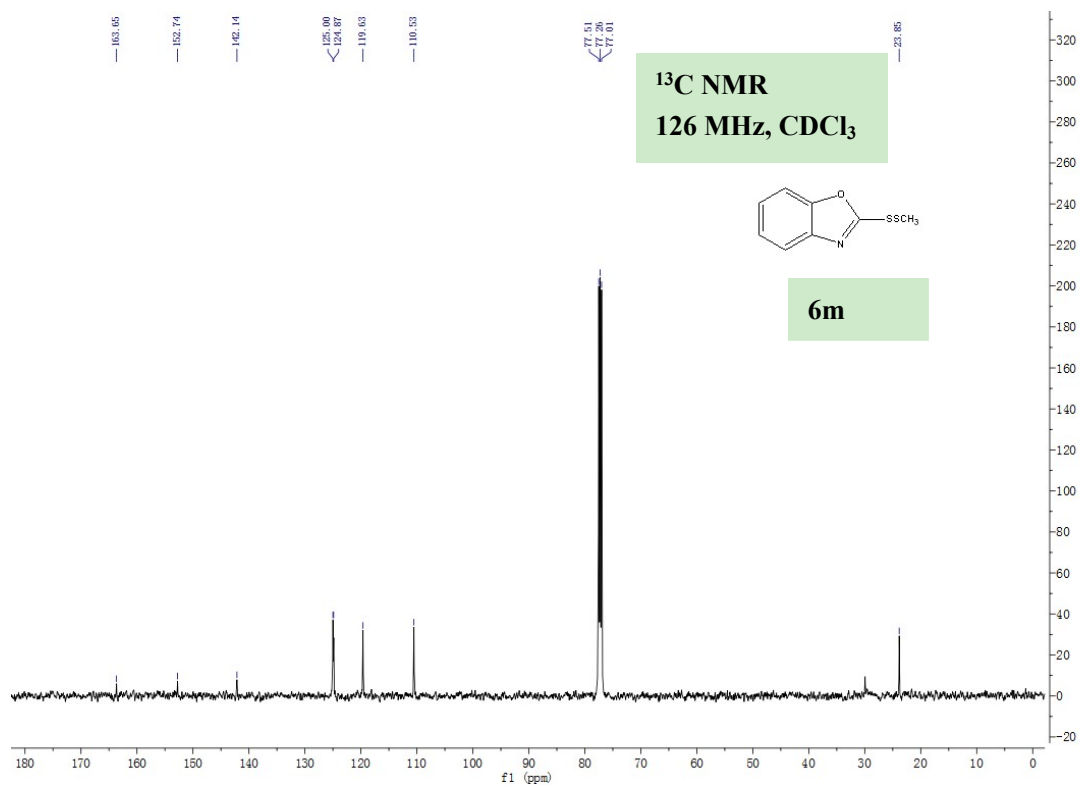

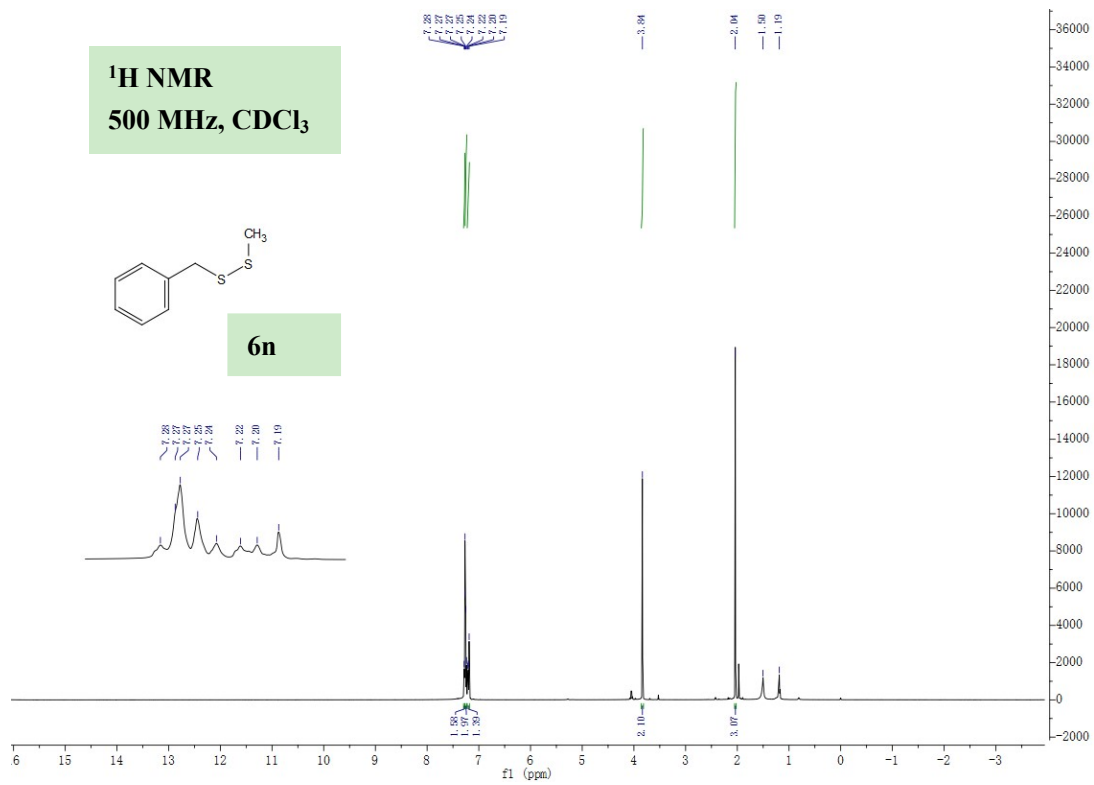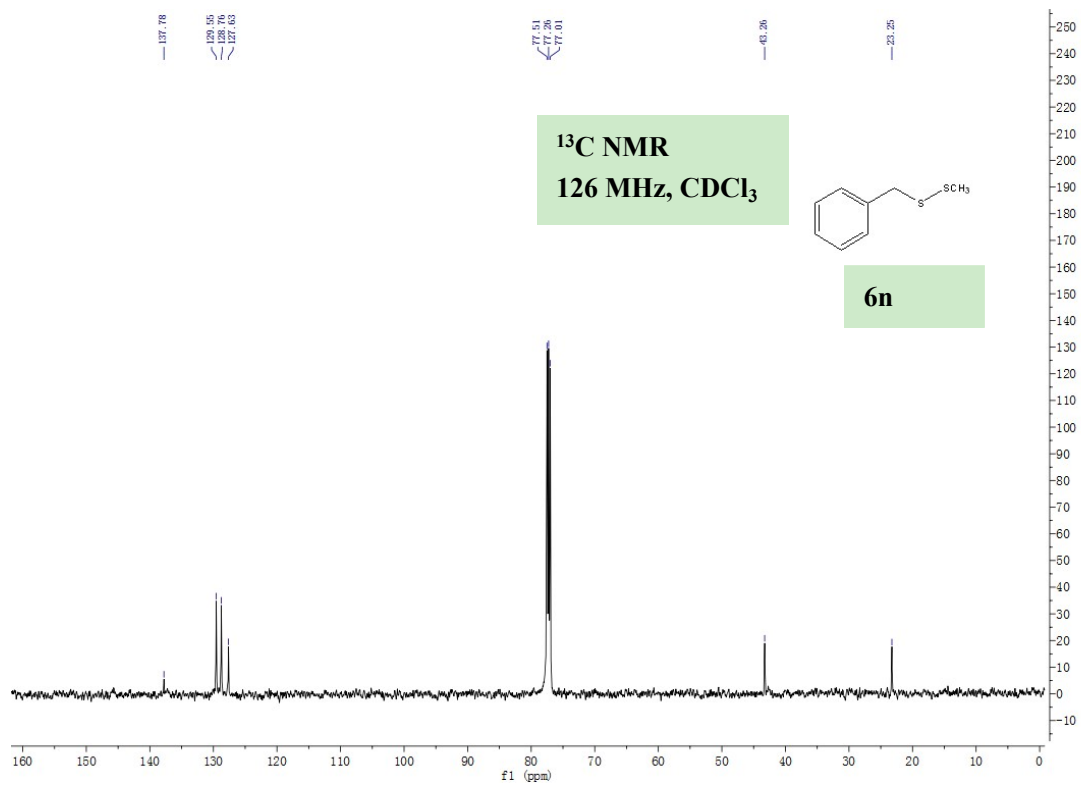

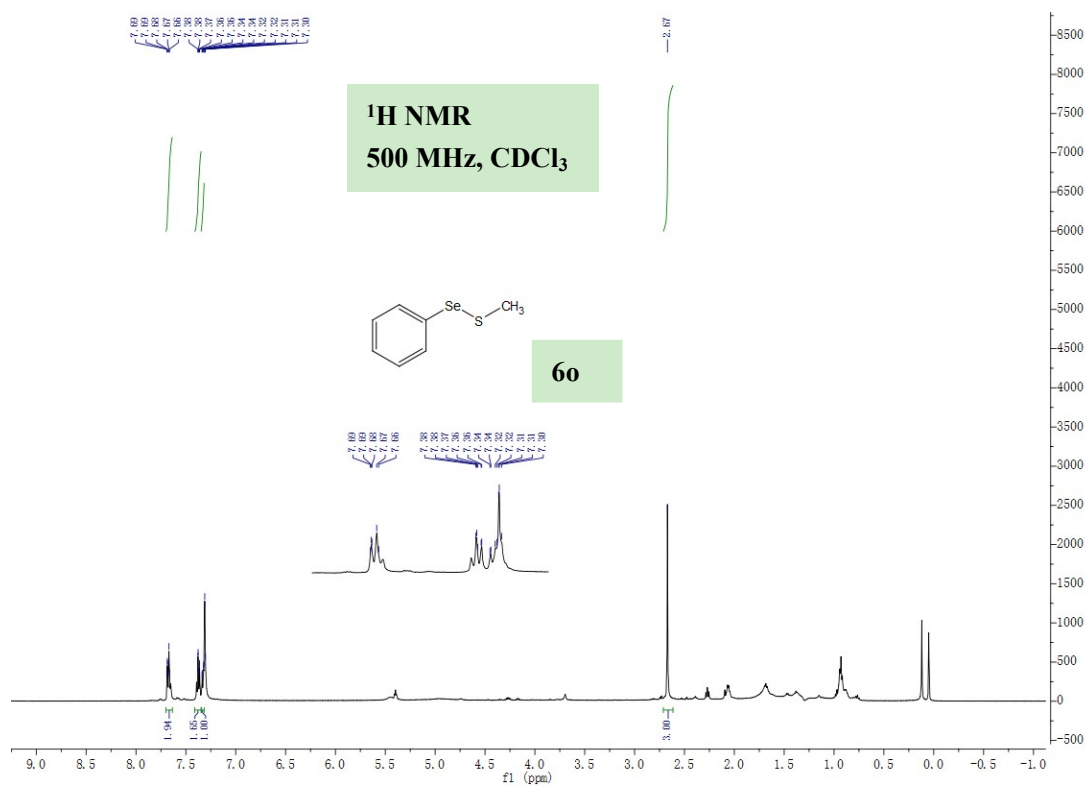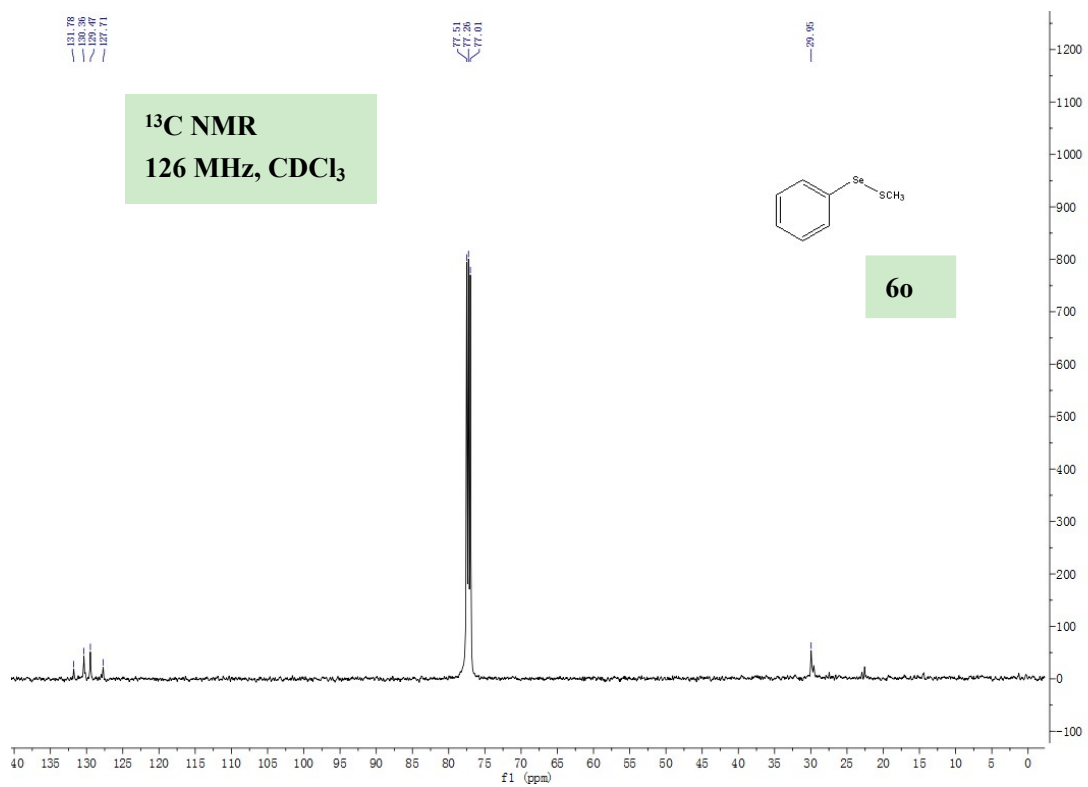



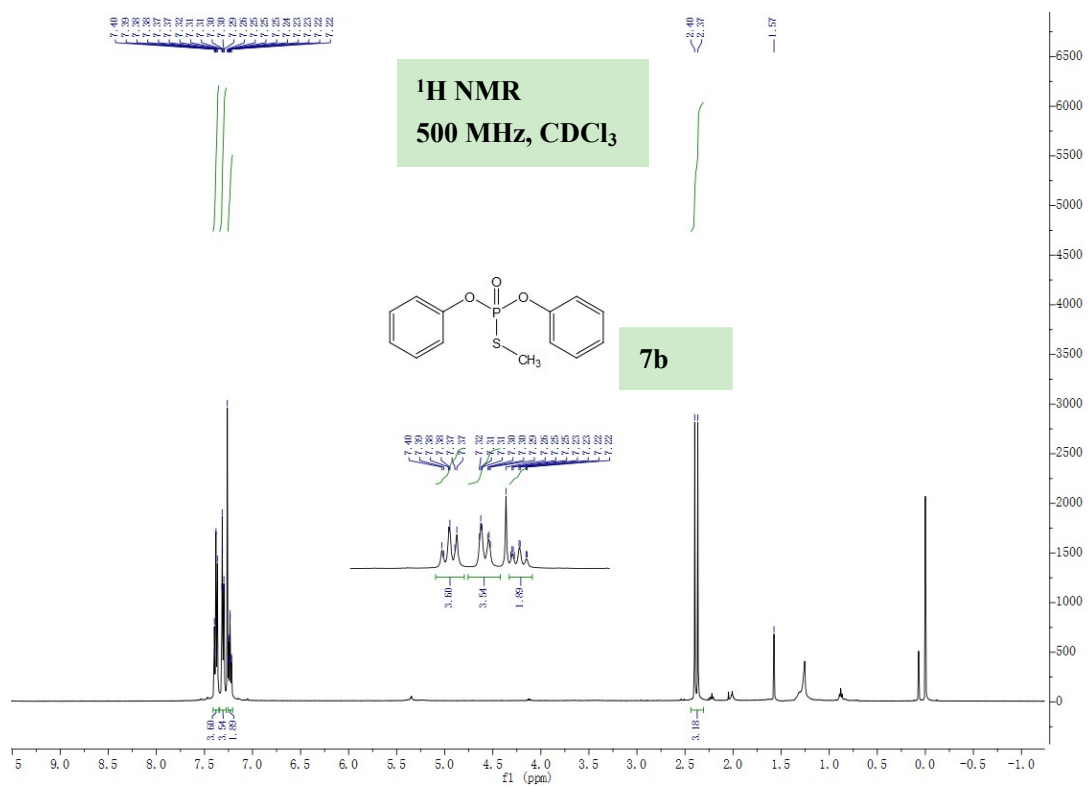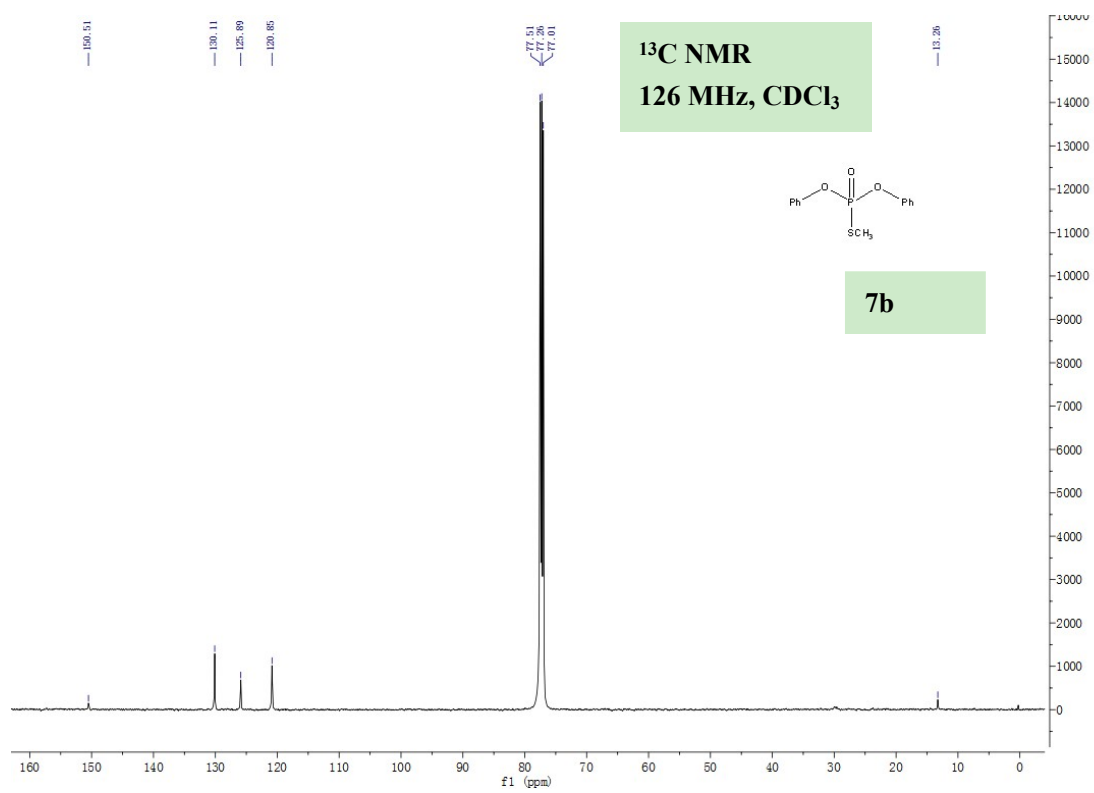

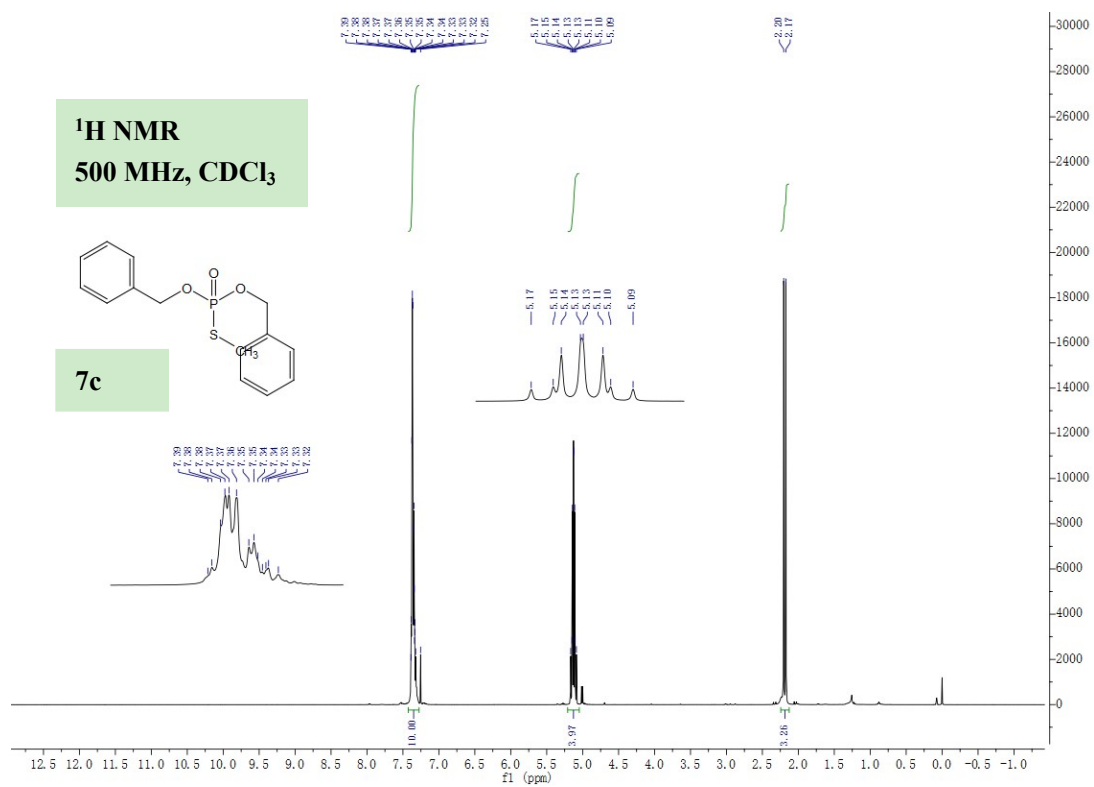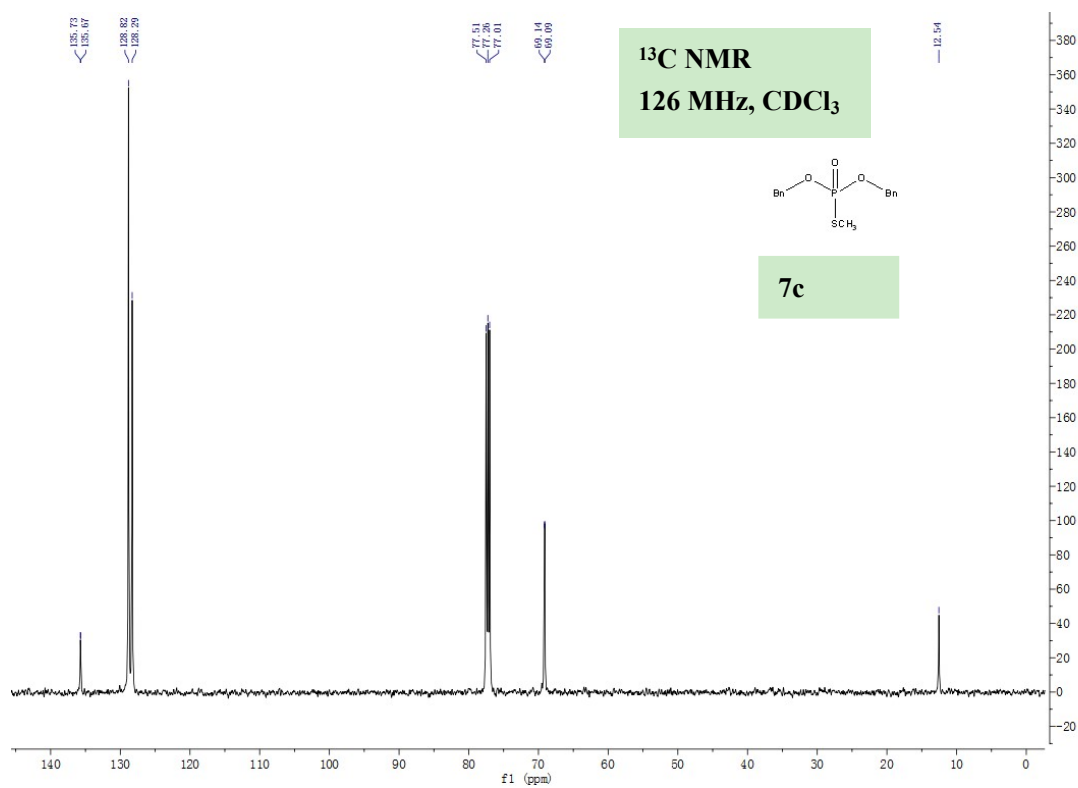



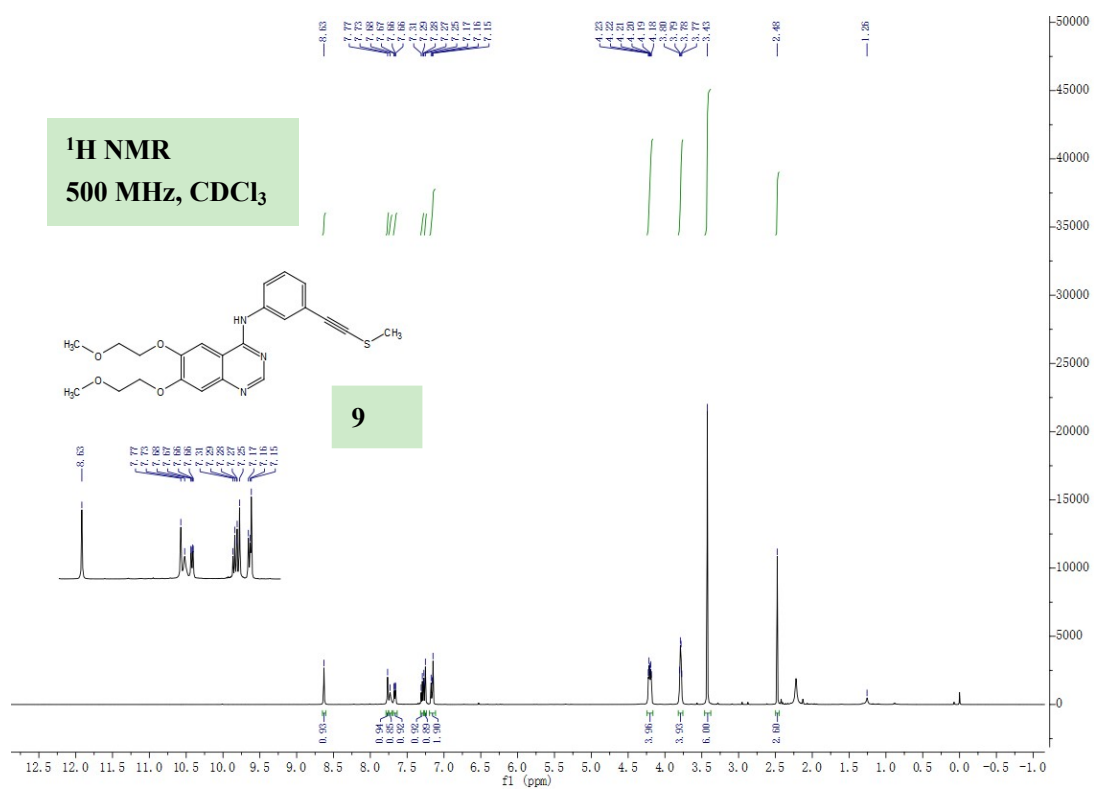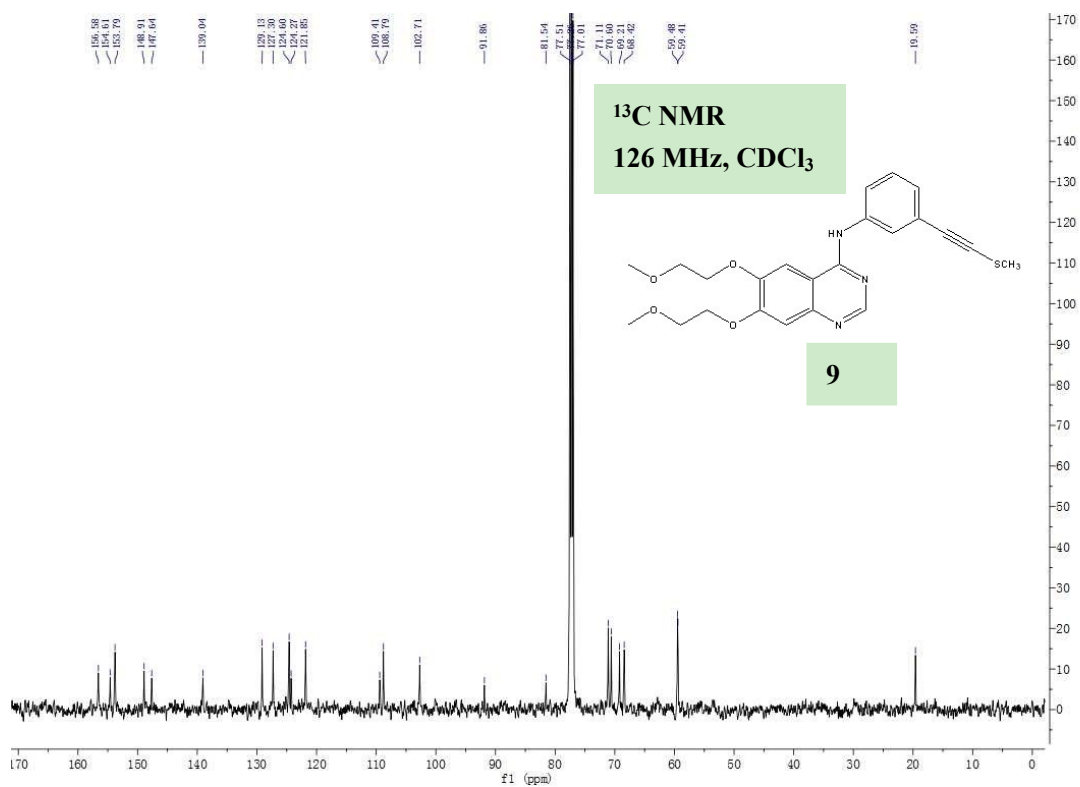

Supplement: d2ob02056d1.pdf [file d2ob02056d1.pdf]
